# Supplementary material for: Annelid adult cell type diversity and their pluripotent cellular origins
Source: PubMed Central journal article supplement (PMC11014941; doi:10.1038/s41467-024-47401-6), 2024-04-12

leiden\_1.5 cluster 0

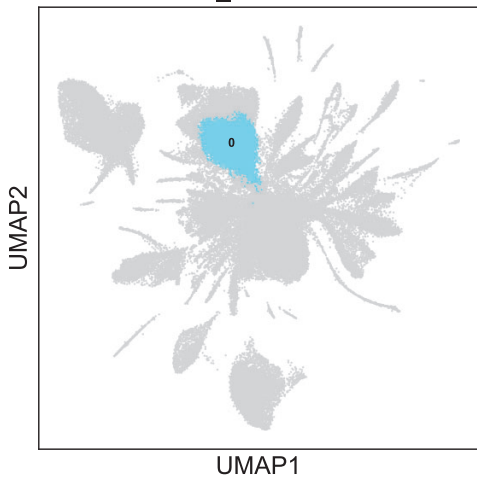

PrileiEVm001963t1

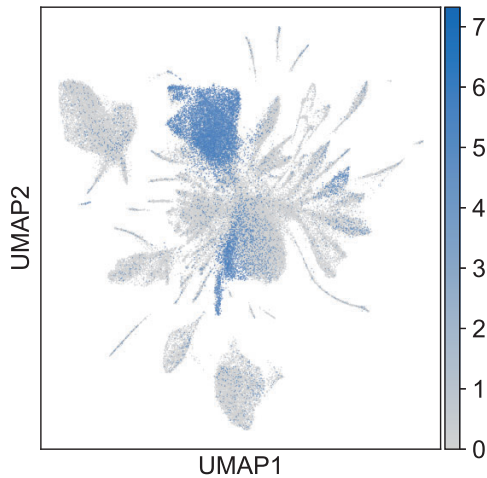

PrileiEVm008287t1

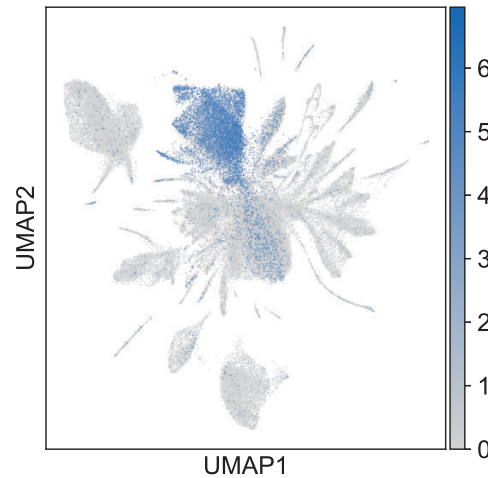

PrileiEVm000041t1

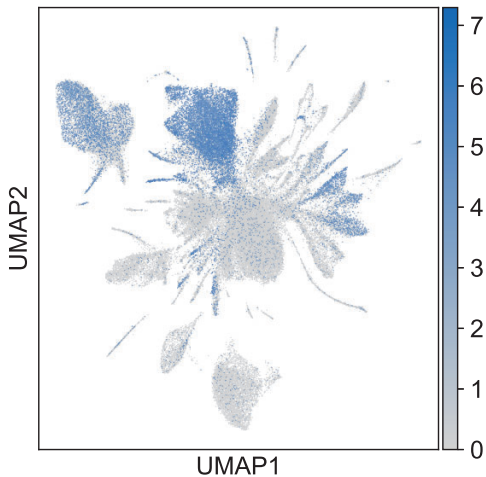

PrileiEVm008309t1

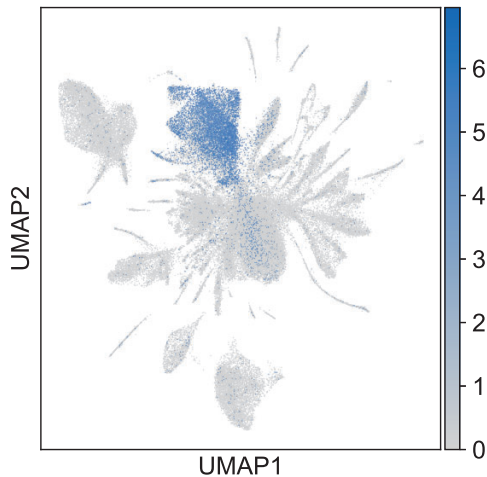

PrileiEVm021489t1

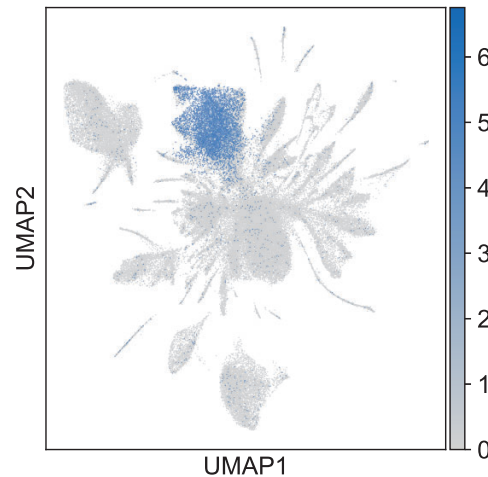

PrileiEVm017189t1

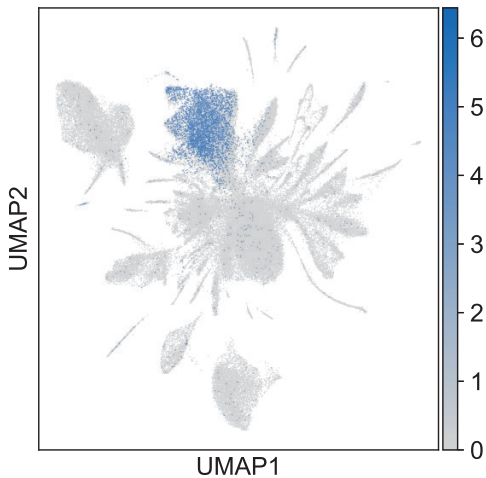

PrileiEVm016392t1

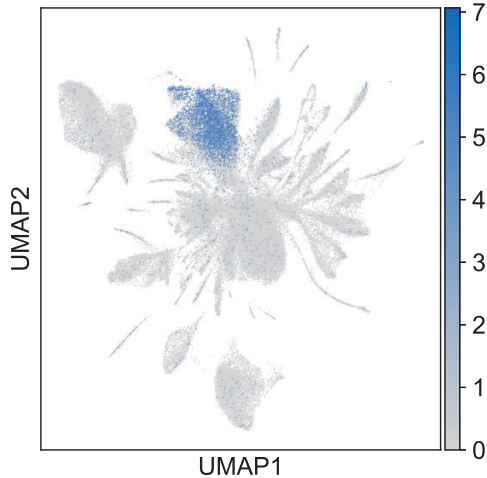

PrileiEVm022014t1

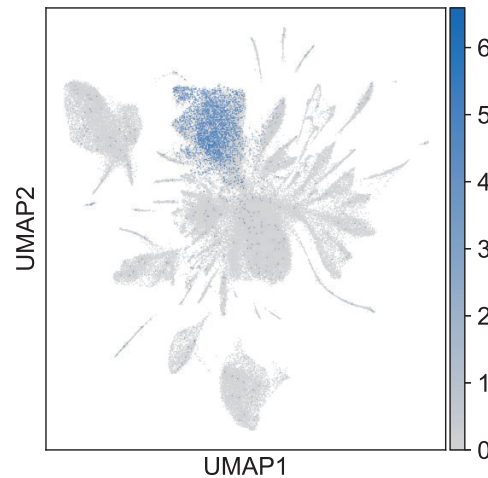

leiden\_1.5 cluster 1

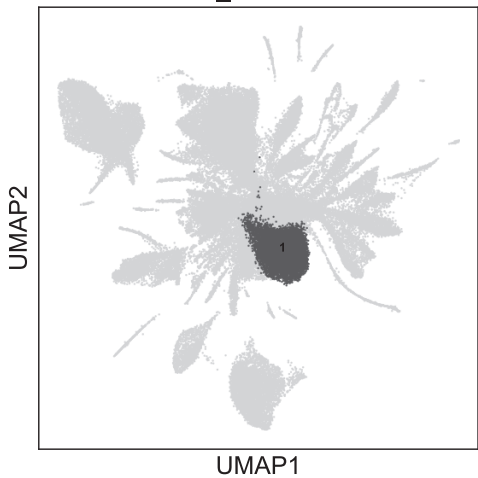

PrileiEVm023936t1

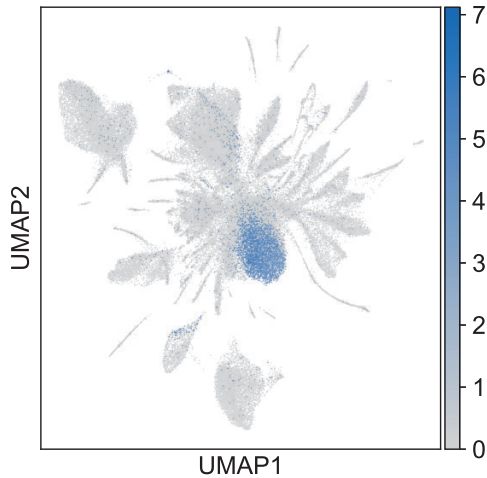

PrileiEVm030296t1

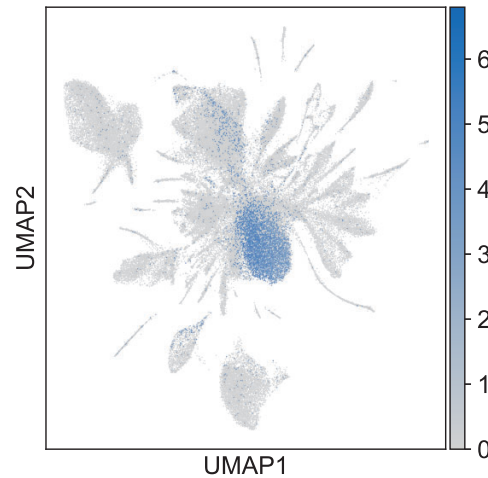

PrileiEVm018623t1

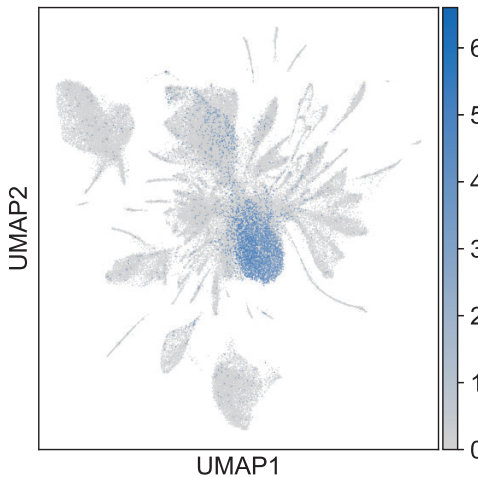

PrileiEVm022498t1

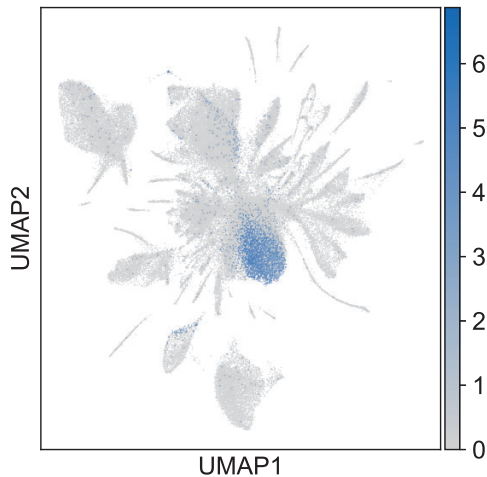

PrileiEVm001391t1

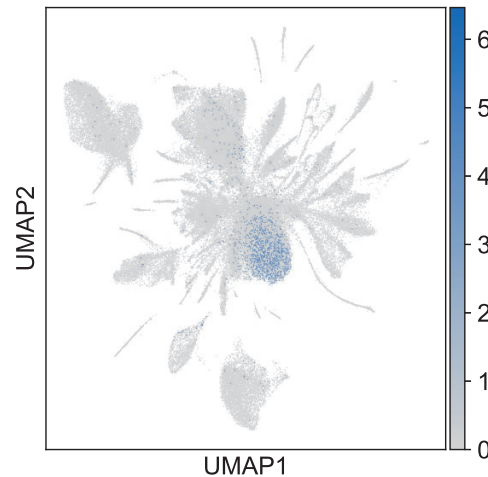

PrileiEVm000070t1

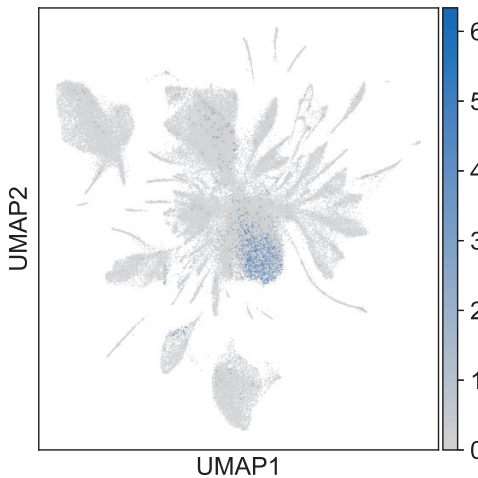

PrileiEVm000603t1

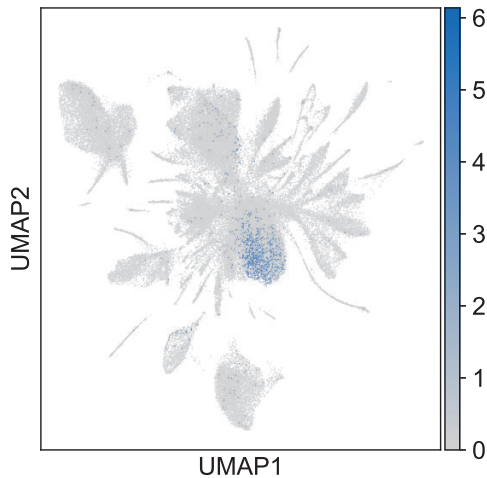

PrileiEVm025662t1

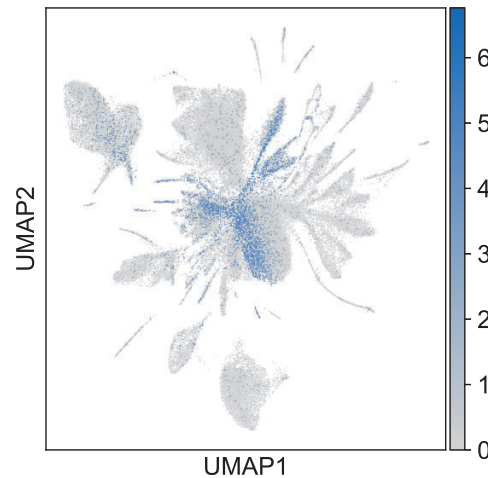

leiden\_1.5 cluster 2

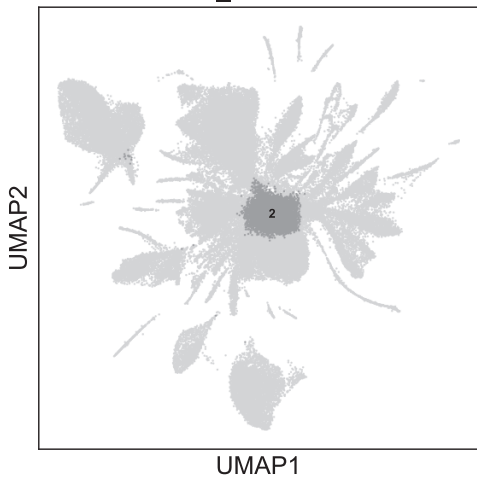

PrileiEVM023763t1

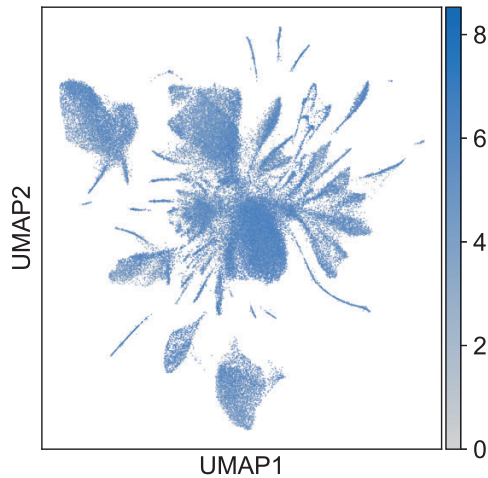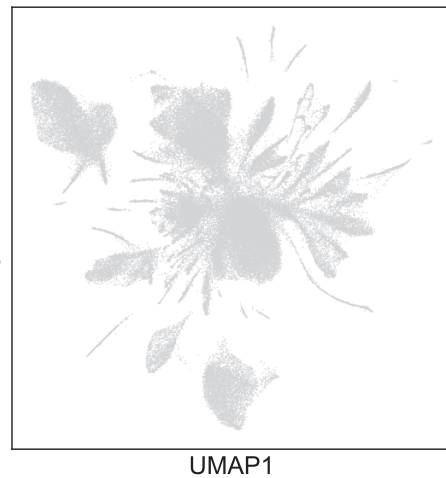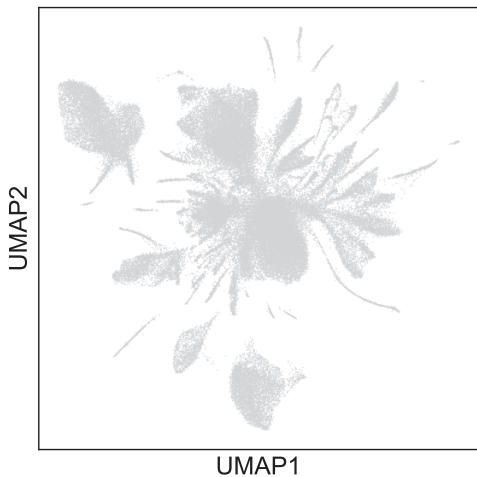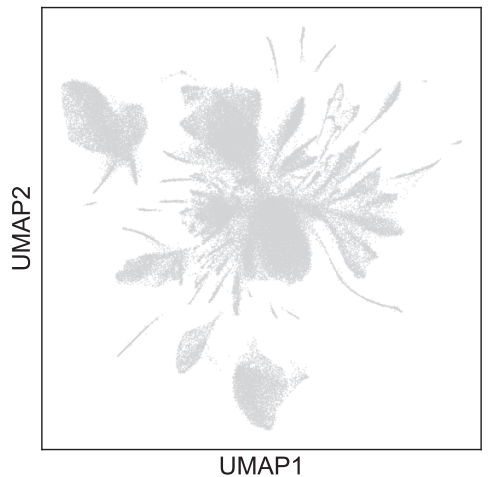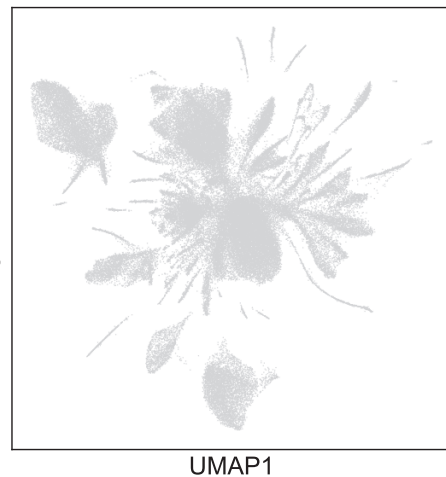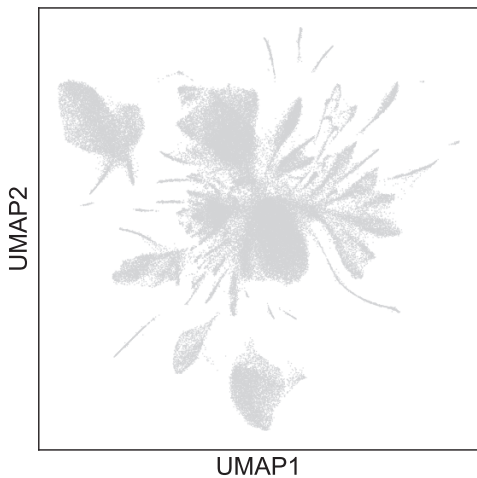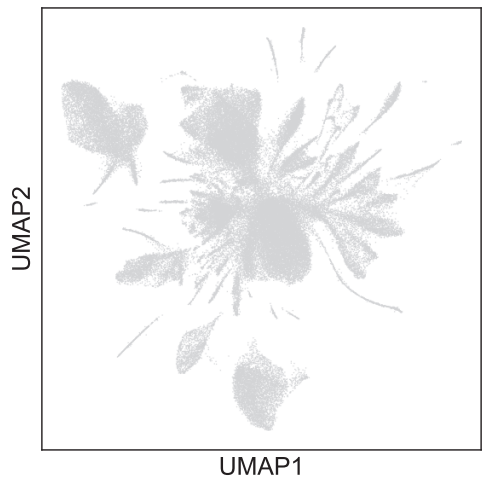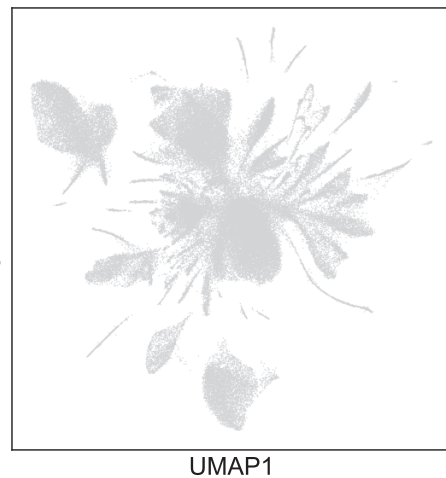

leiden\_1.5 cluster 3

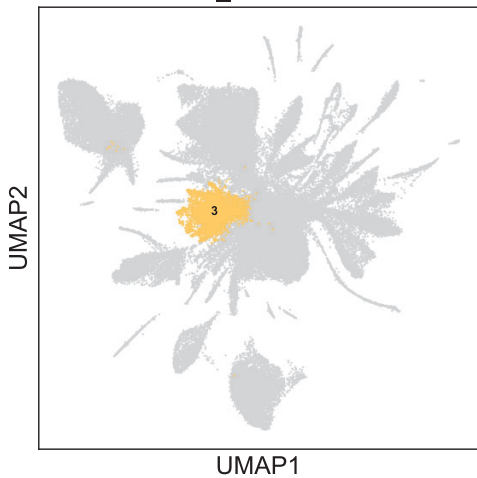

PrileiEVm015601t1

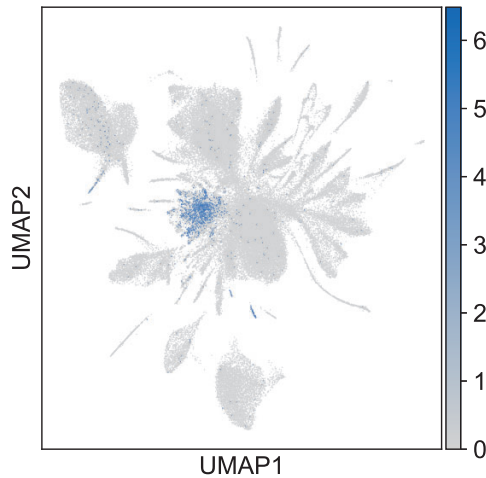

PrileiEVm009320t1

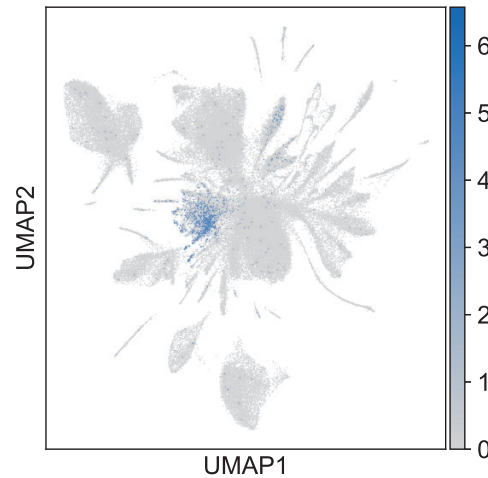

PrileiEVm006795t1

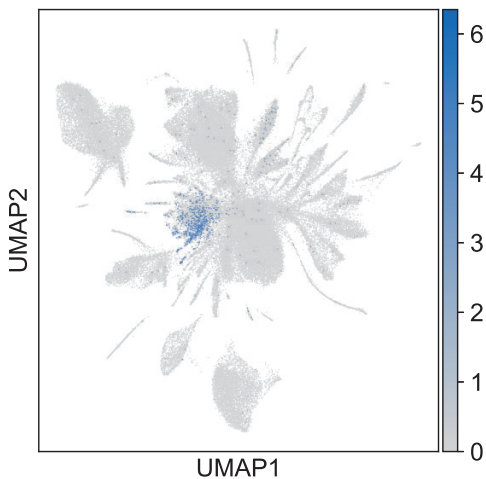

PrileiEVm011952t1

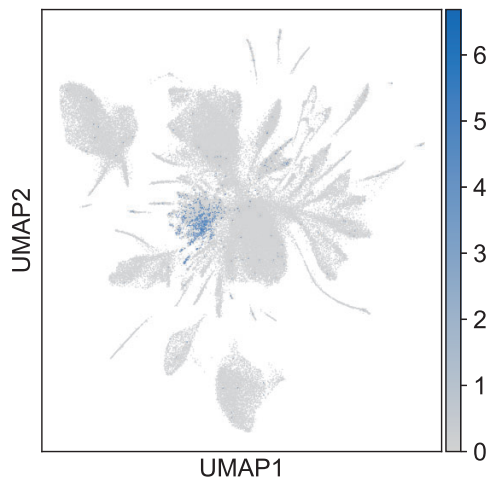

PrileiEVm000558t1

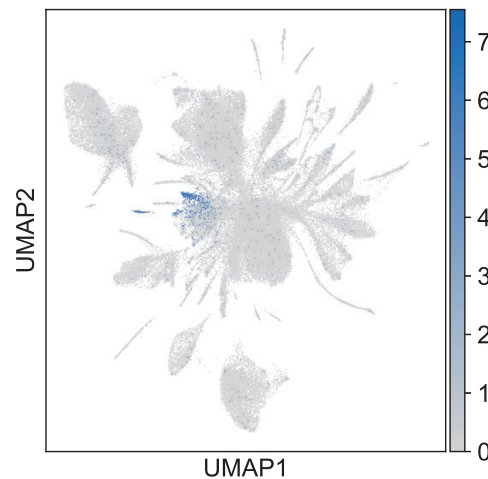

PrileiEVm000120t1

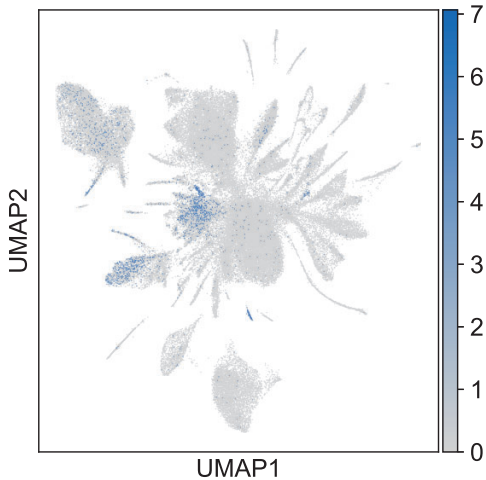

PrileiEVm020519t1

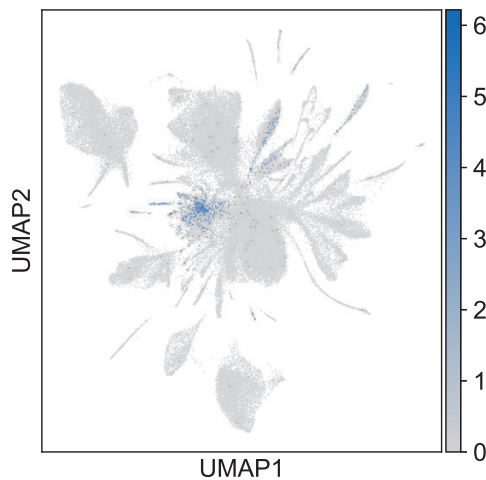

PrileiEVm017476t1

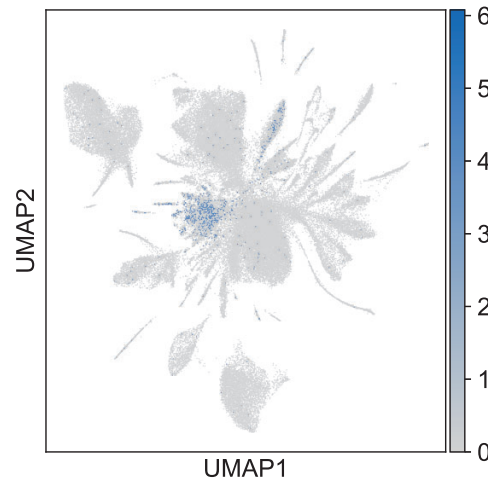



leiden\_1.5 cluster 4

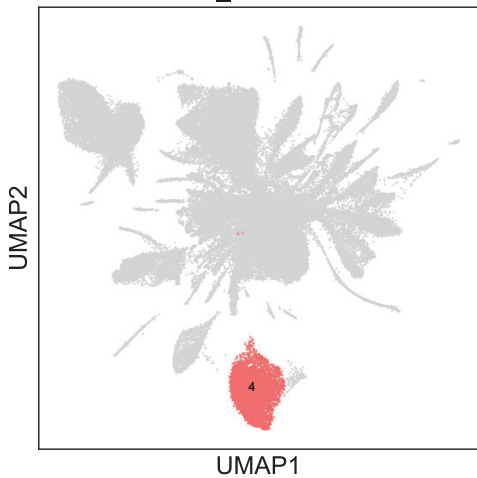

PrileiEVm020672t1

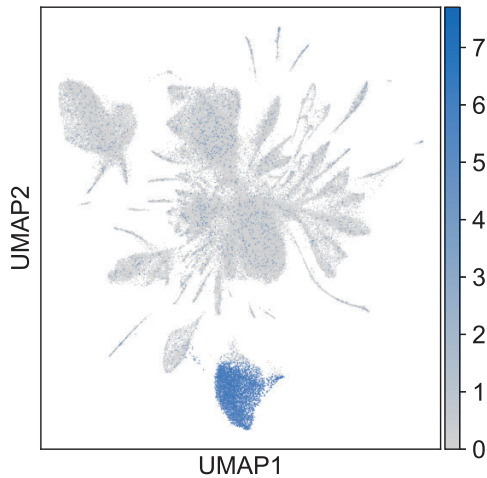

PrileiEVm018061t1

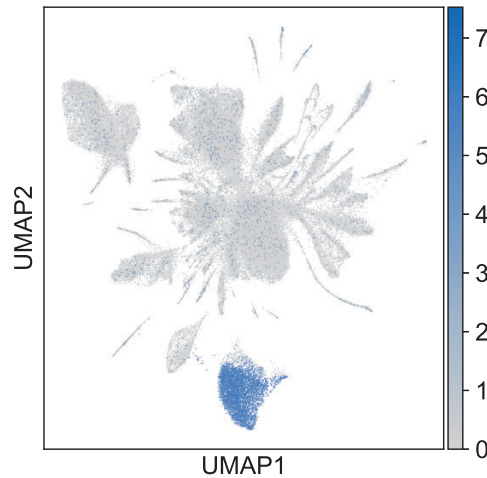

PrileiEVm000002t1

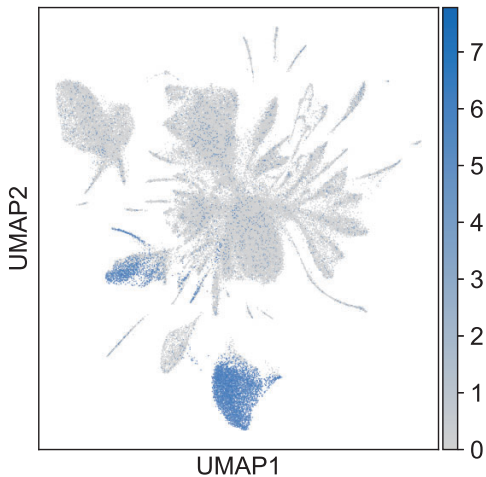

PrileiEVm015446t1

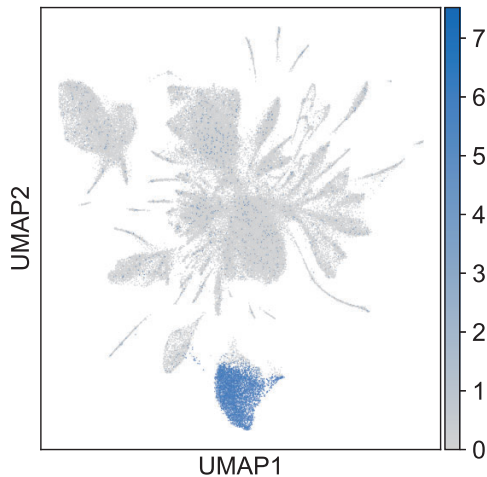

PrileiEVm020599t1

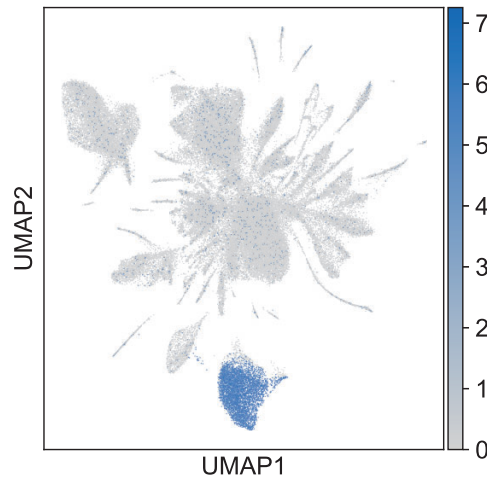

PrileiEVm028005t1

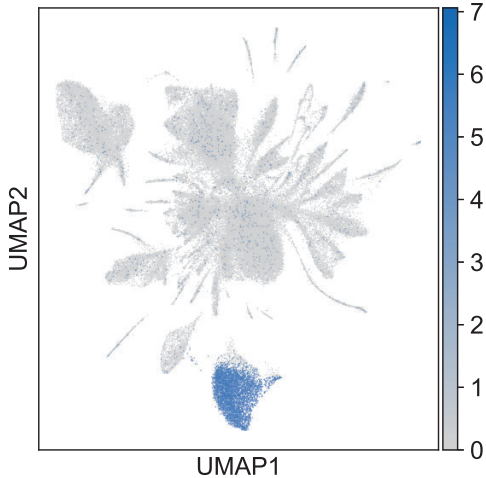

PrileiEVm020147t1

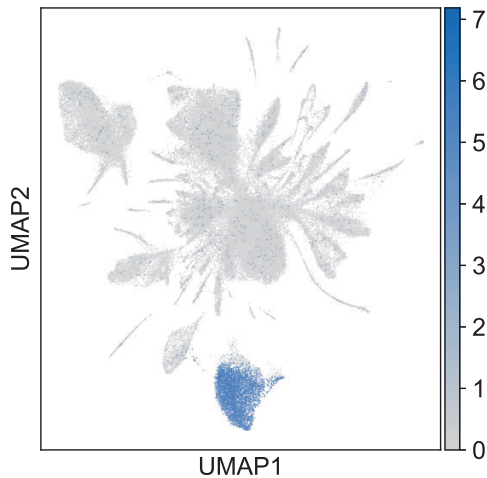

PrileiEVm017615t1

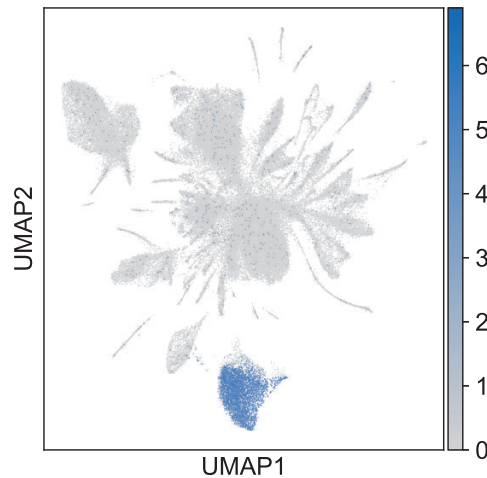

leiden\_1.5 cluster 5

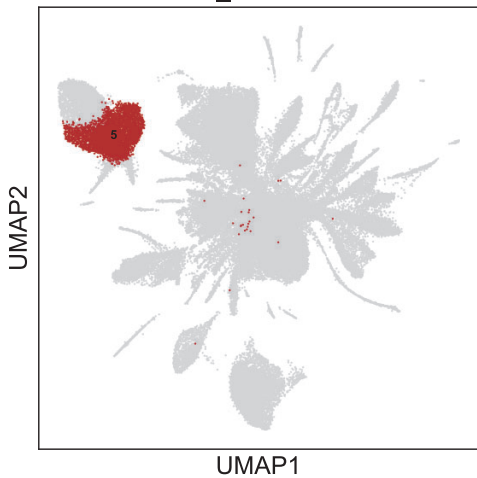

PrileiEVm011741t1

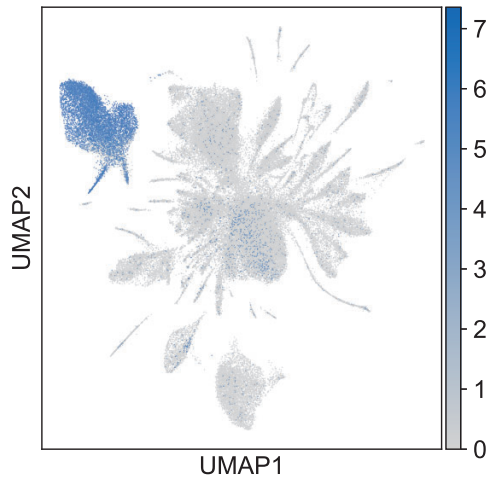

PrileiEVm000300t1

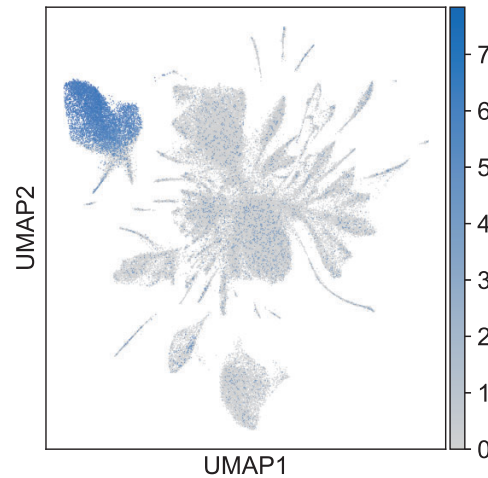

PrileiEVm016172t1

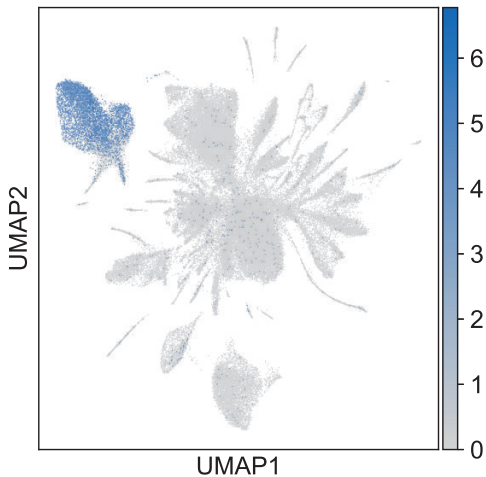

PrileiEVm016000t1

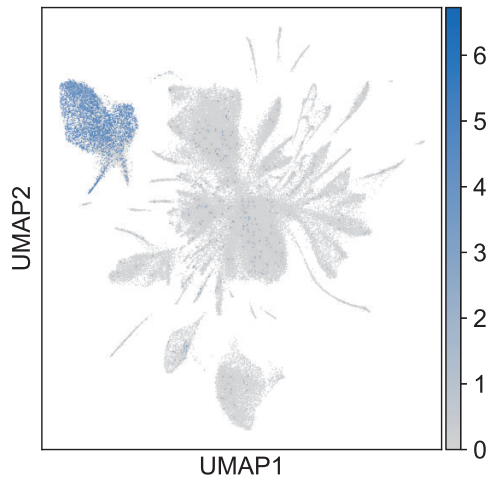

PrileiEVm012191t1

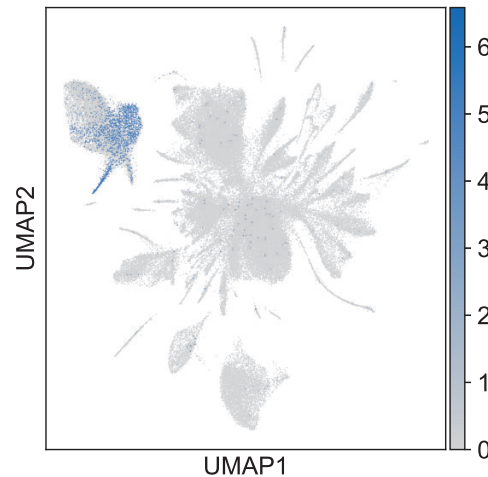

PrileiEVm018738t1

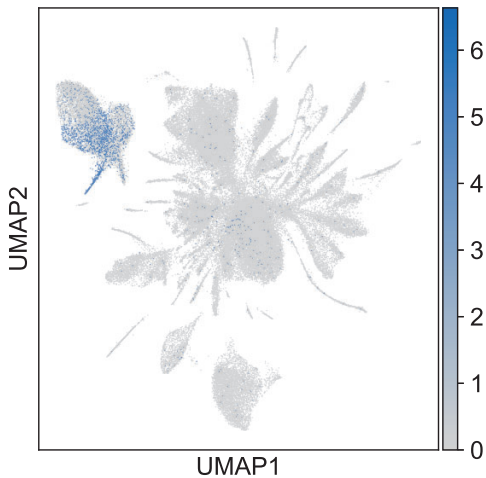

PrileiEVm000077t1

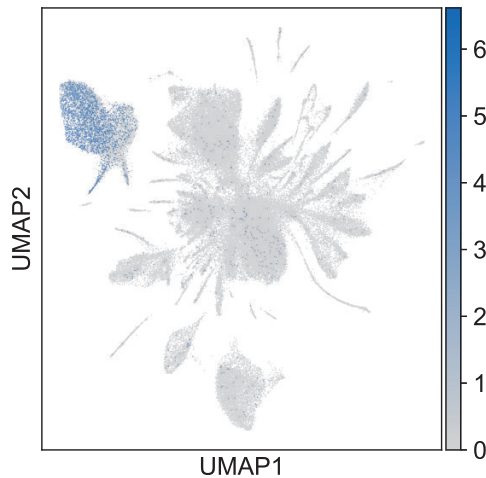

PrileiEVm003774t1

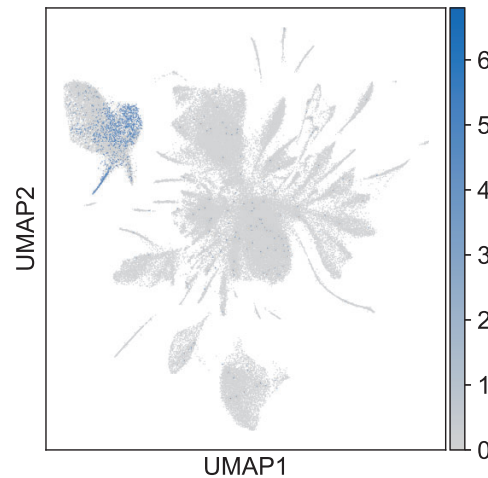

leiden\_1.5 cluster 6

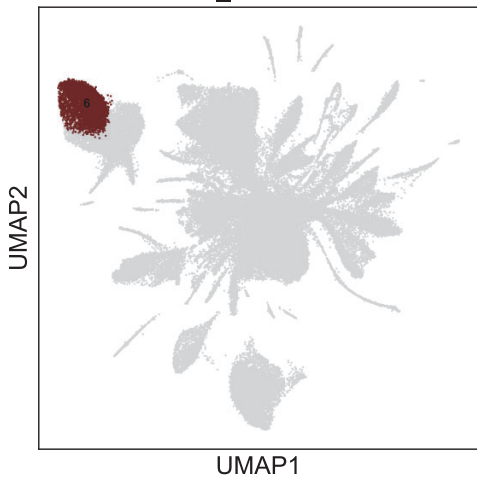

PrileiEVm019310t1

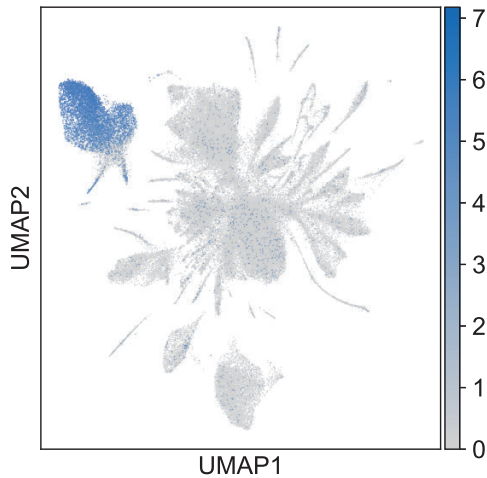

PrileiEVm019924t1

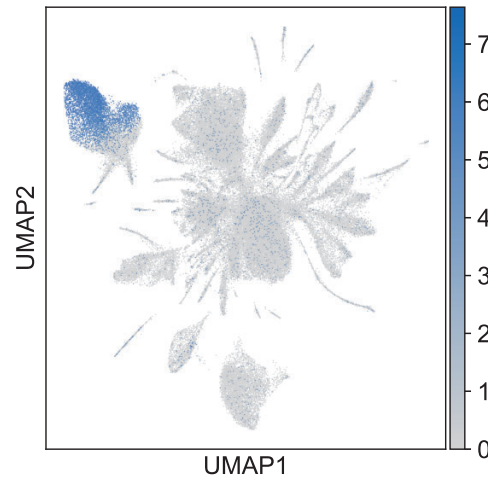

PrileiEVm014978t1

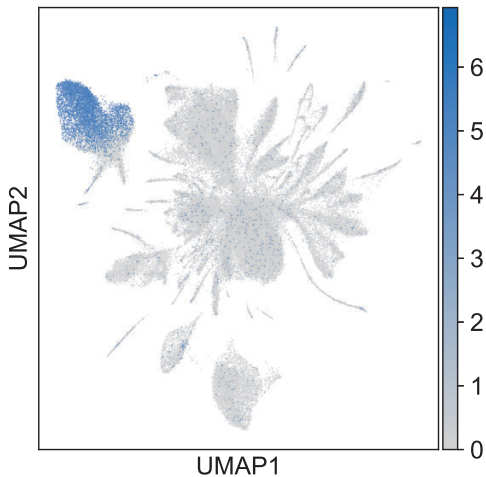

PrileiEVm005323t1

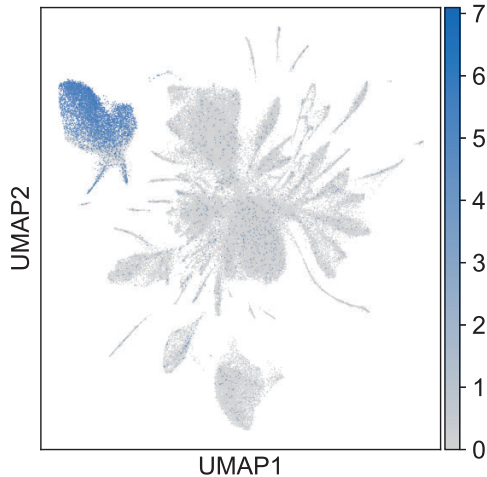

PrileiEVm020932t1

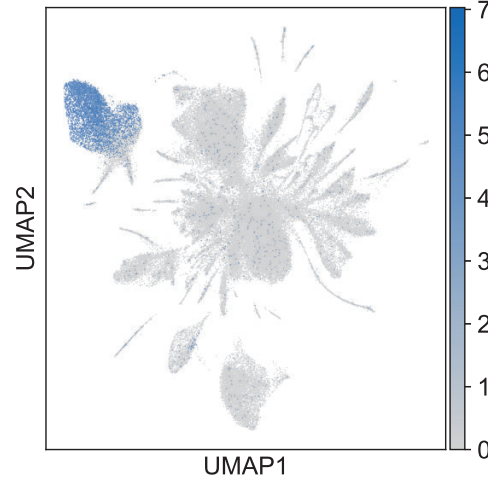

PrileiEVm001199t1

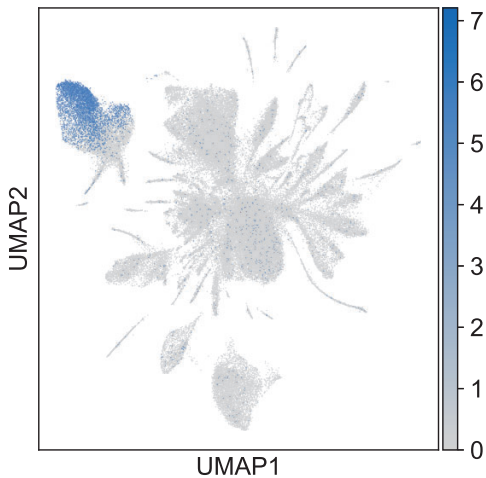

PrileiEVm019293t1

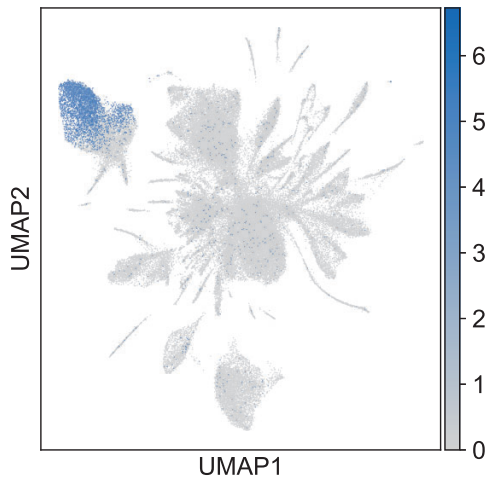

PrileiEVm015106t1

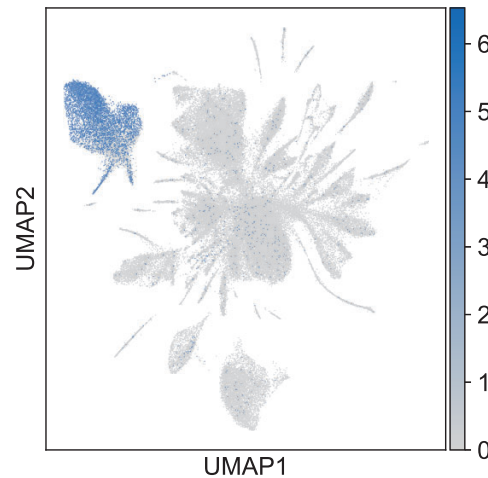



leiden\_1.5 cluster 7

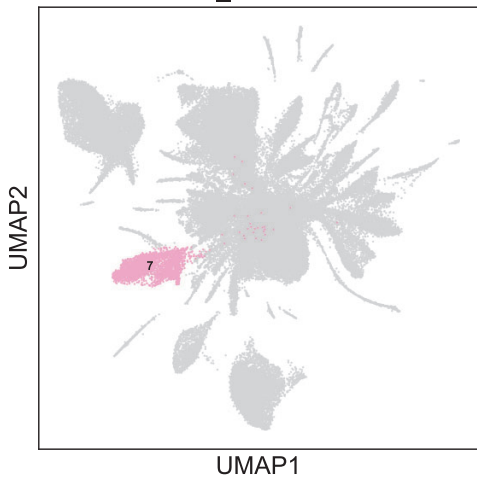

PrileiEVm013699t1

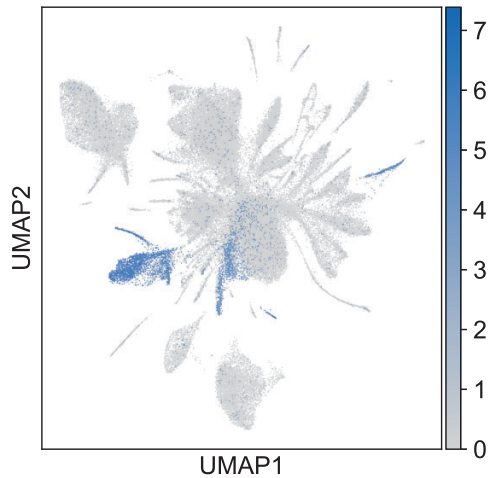

PrileiEVm011349t1

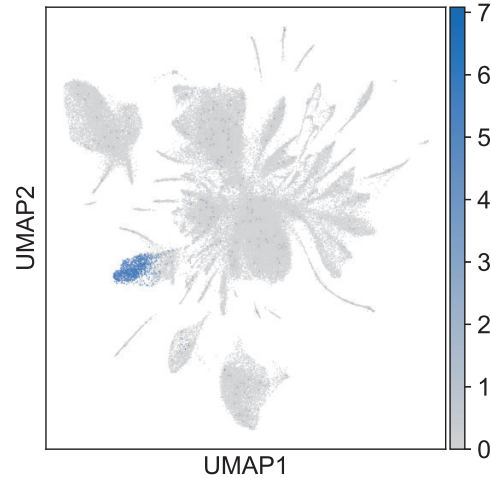

PrileiEVm016309t1

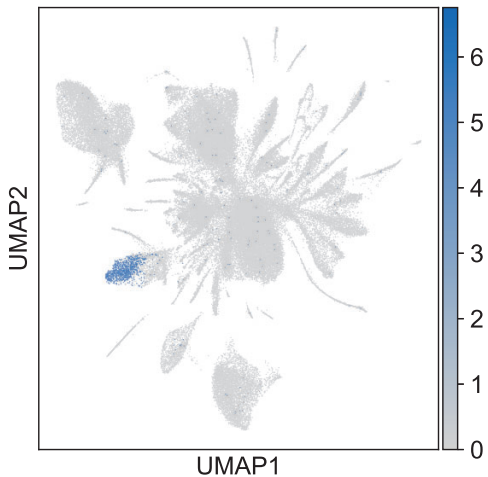

PrileiEVm021038t1

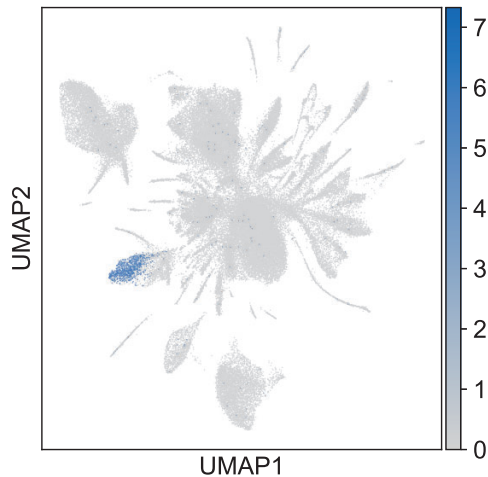

PrileiEVm000002t1

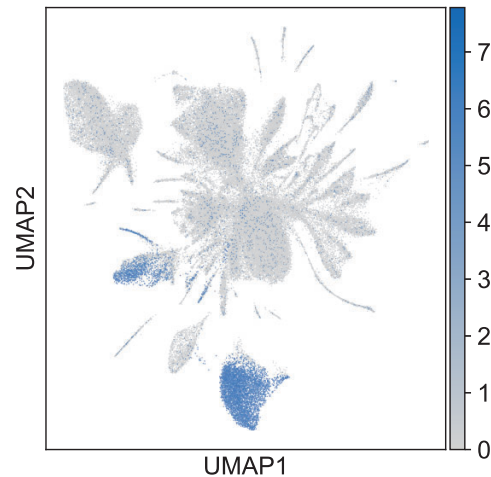

PrileiEVm015466t1

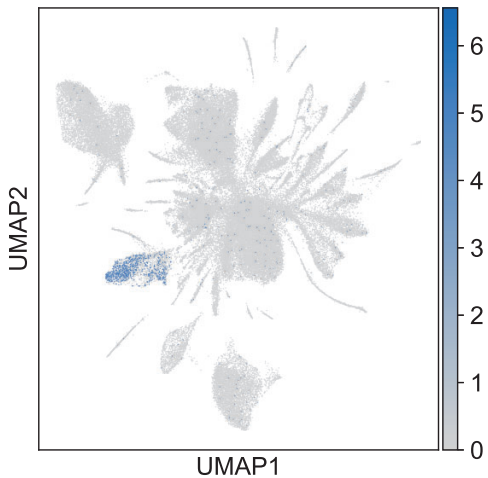

PrileiEVm009033t1

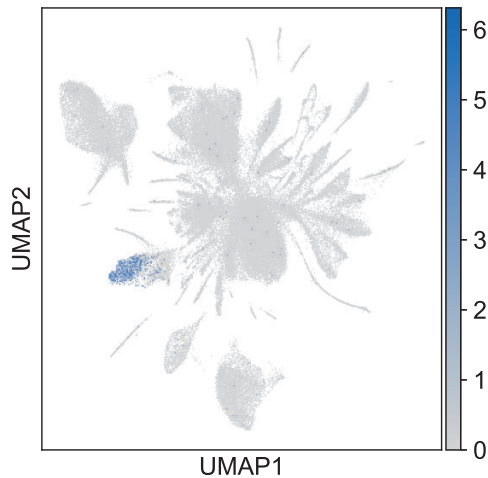

PrileiEVm015958t1

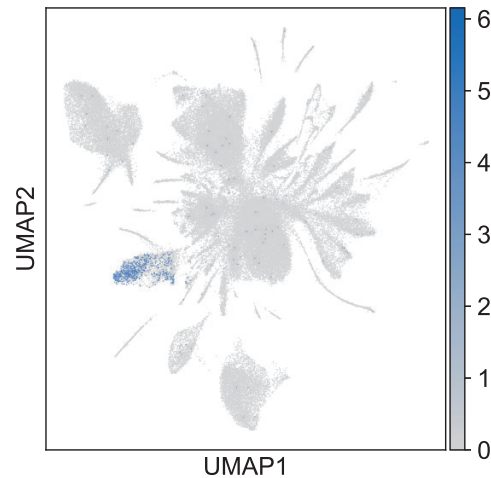



leiden\_1.5 cluster 8

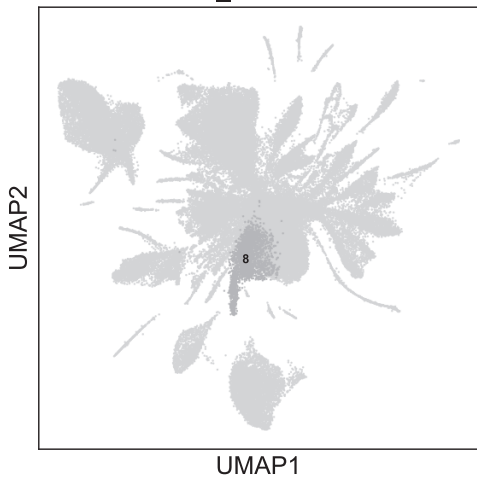

PrileiEVm001963t1

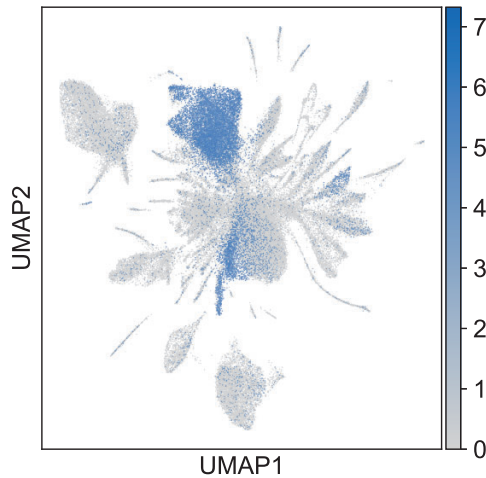

PrileiEVm013699t1

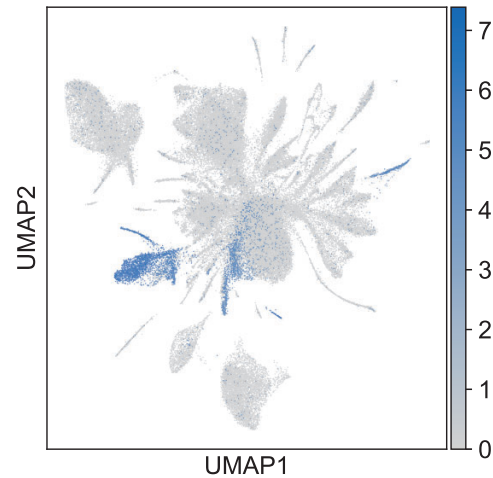

PrileiEVm006872t1

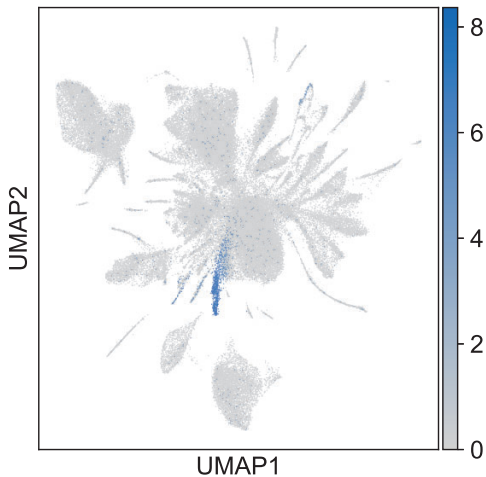

PrileiEVm008973t1

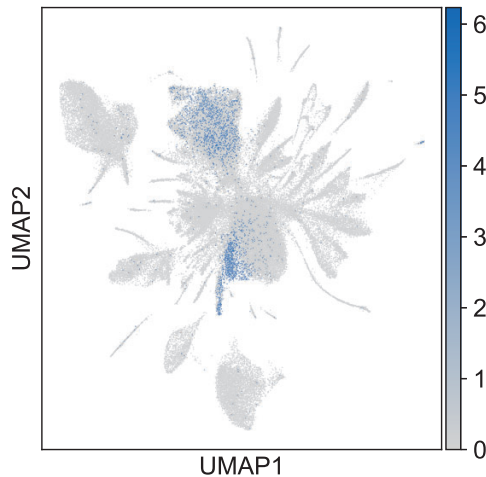

PrileiEVm000106t1

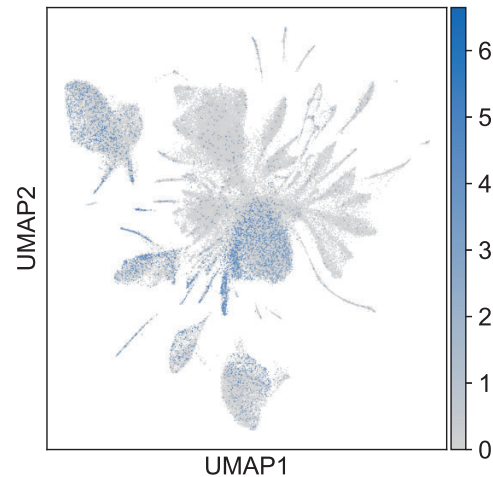

PrileiEVm005442t1

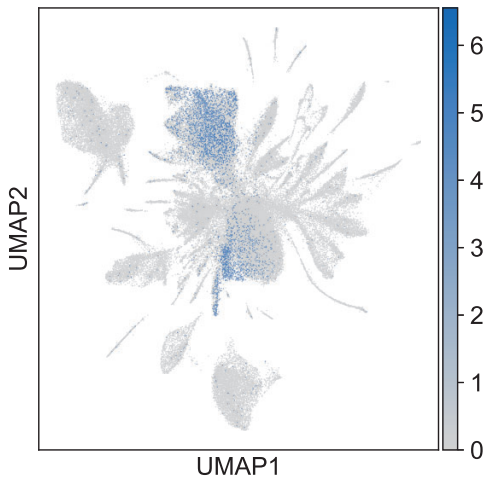

PrileiEVm002280t1

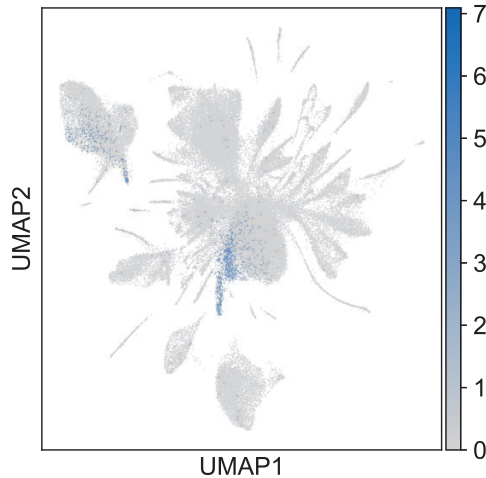

PrileiEVm005681t1

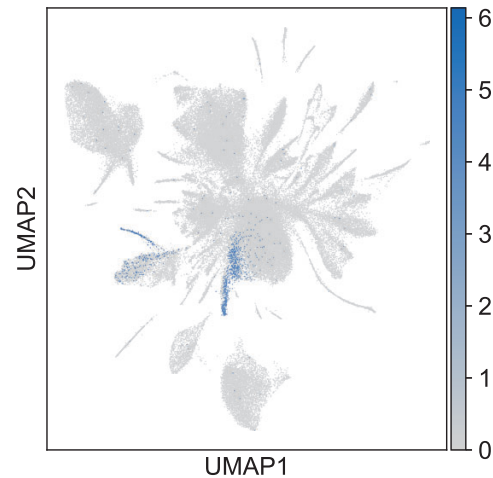

leiden\_1.5 cluster 9

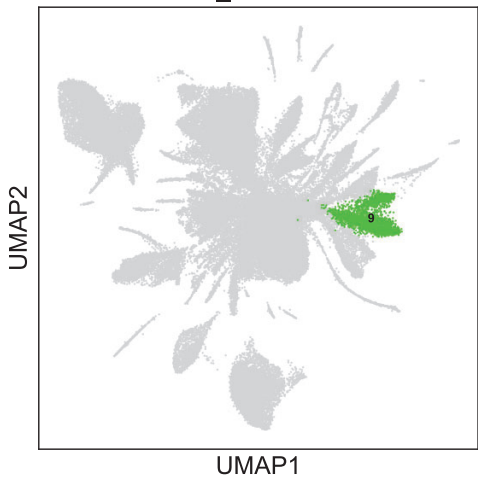

PrileiEVm010571t1

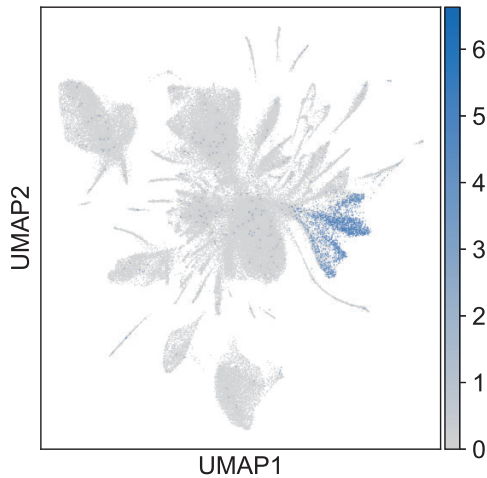

PrileiEVm019930t1

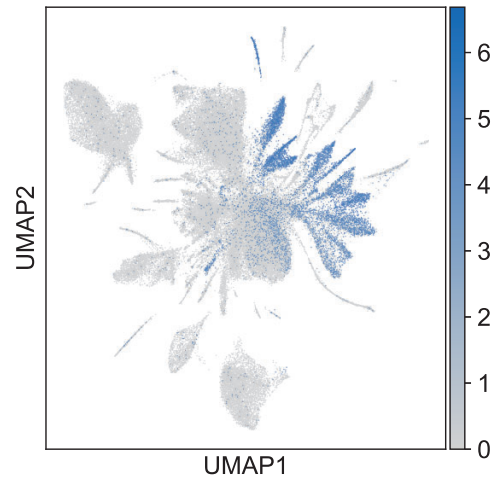

PrileiEVm010941t1

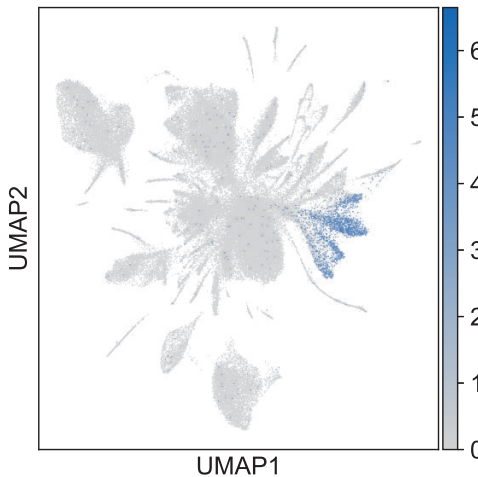

PrileiEVm010132t1

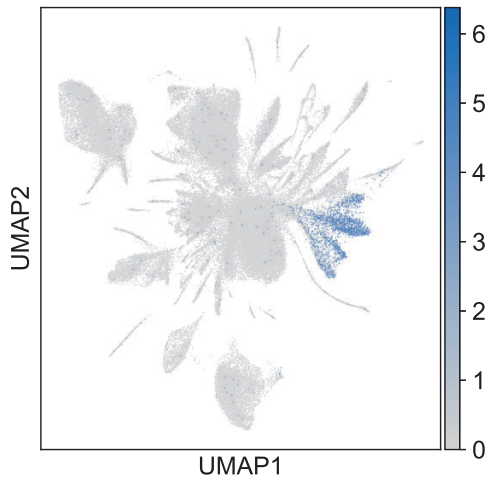

PrileiEVm010637t1

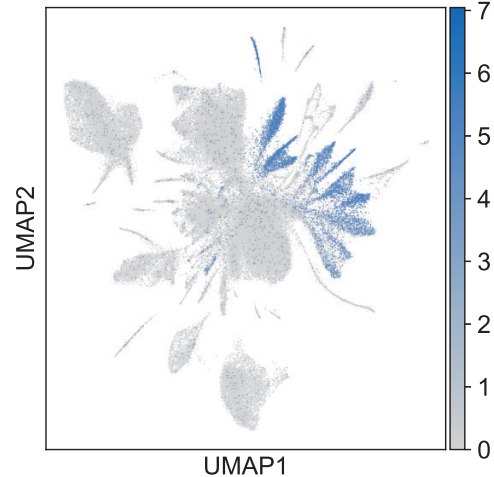

PrileiEVm010617t1

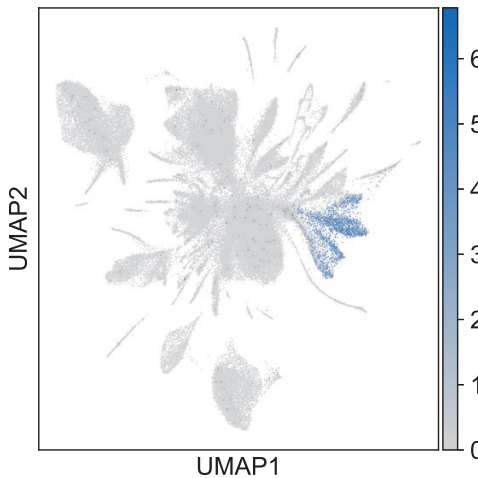

PrileiEVm013722t1

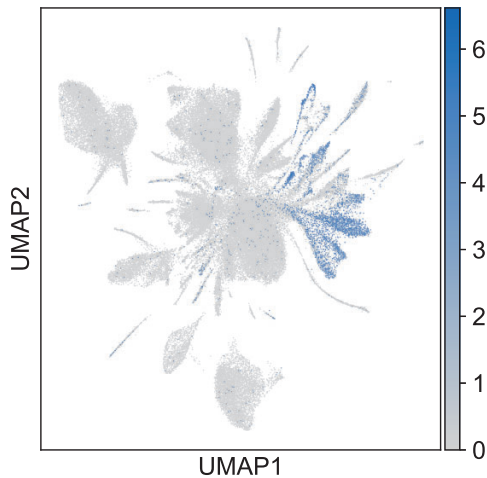

PrileiEVm000530t1

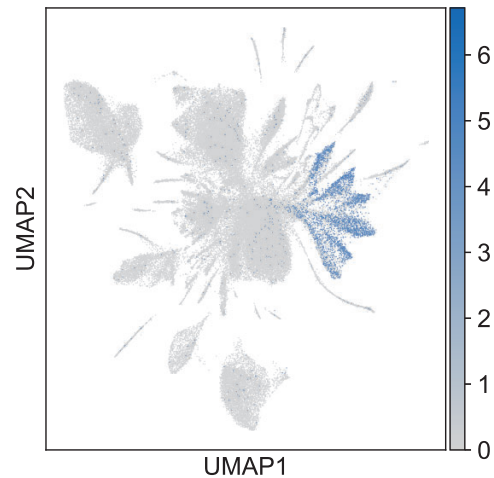

leiden\_1.5 cluster 10

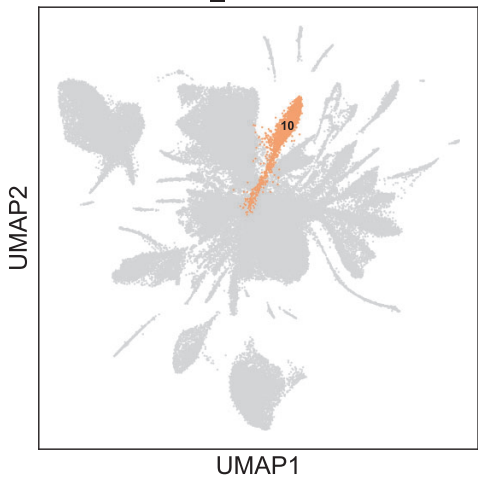

PrileiEVm005033t1

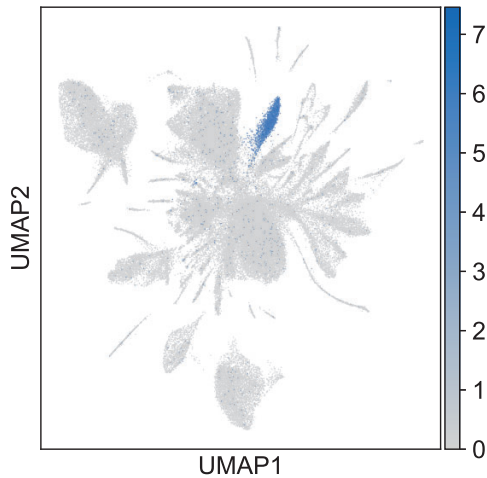

PrileiEVm000036t1

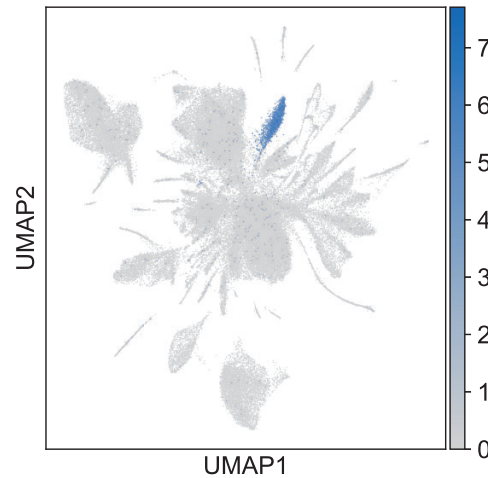

PrileiEVm000151t1

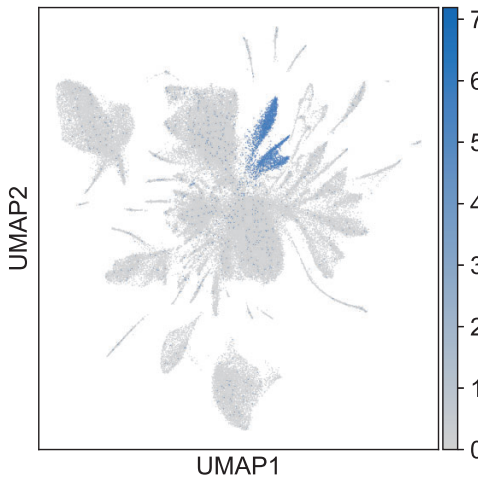

PrileiEVm010637t1

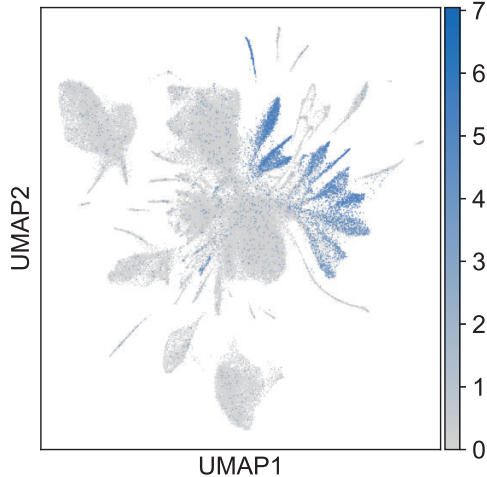

PrileiEVm001103t1

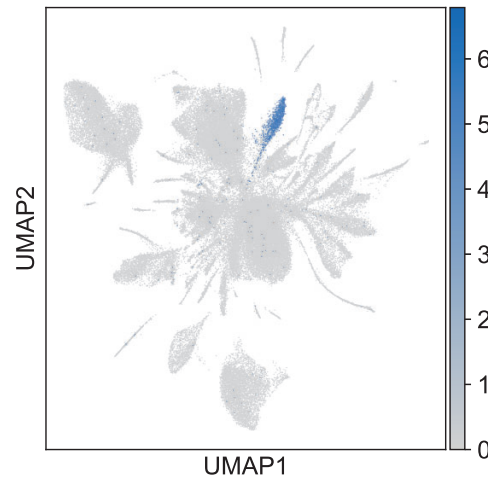

PrileiEVm019889t1

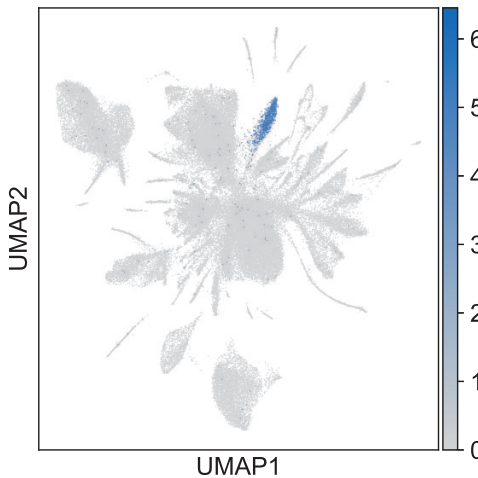

PrileiEVm019930t1

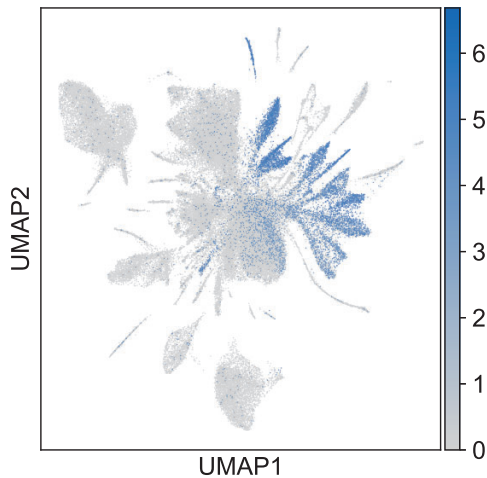

PrileiEVm021478t1

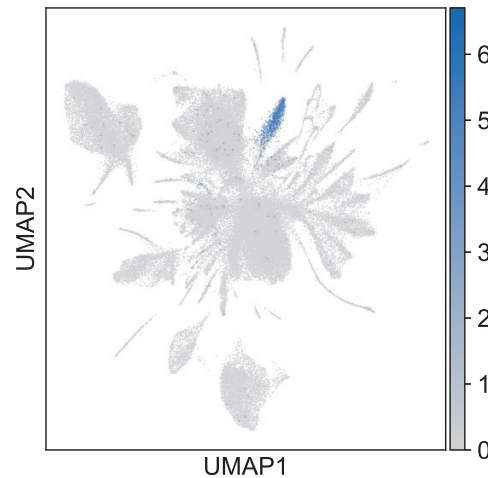



leiden\_1.5 cluster 11

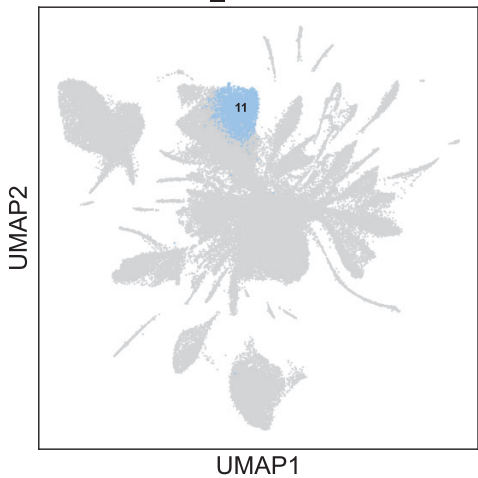

PrileiEVm002200t1

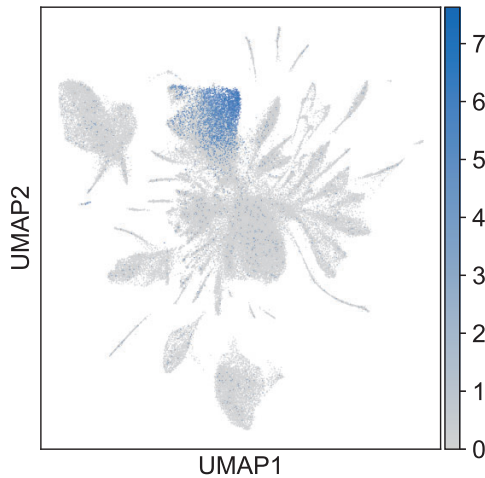

PrileiEVm001963t1

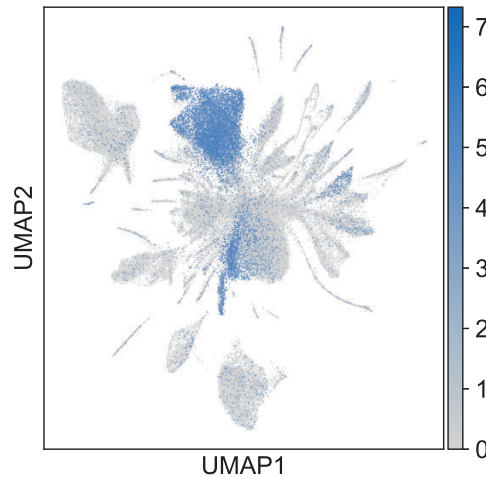

PrileiEVm003697t1

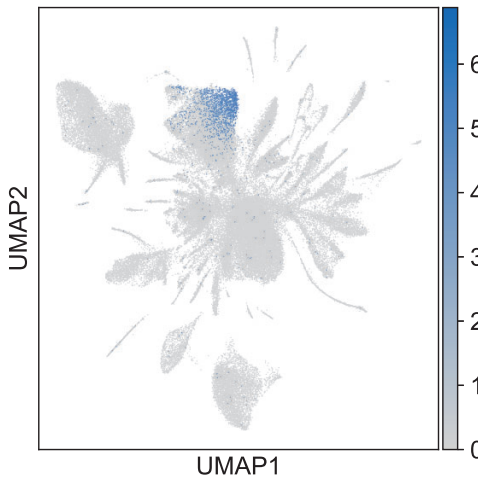

PrileiEVm000041t1

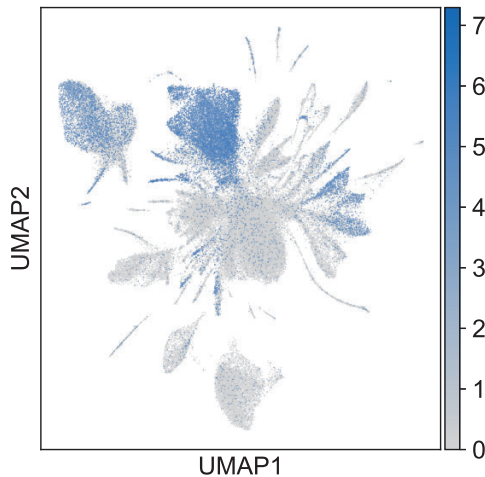

PrileiEVm003653t1

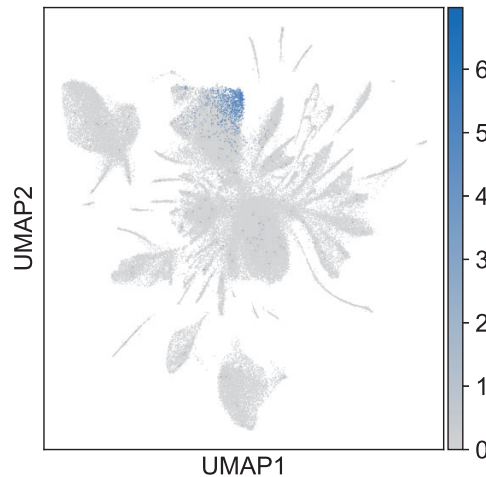

PrileiEVm023496t1

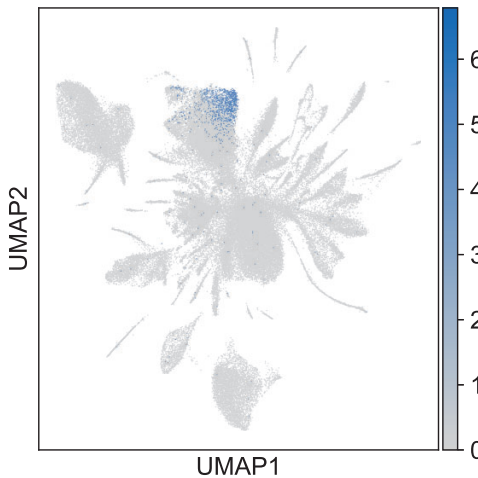

PrileiEVm008309t1

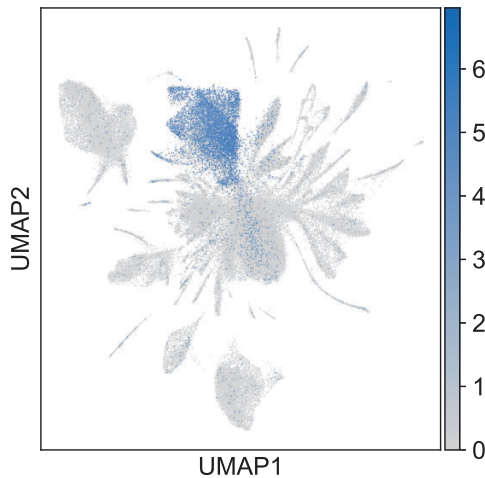

PrileiEVm017556t1

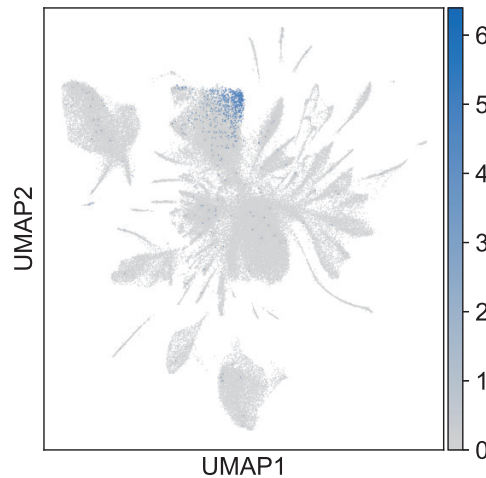



leiden\_1.5 cluster 12

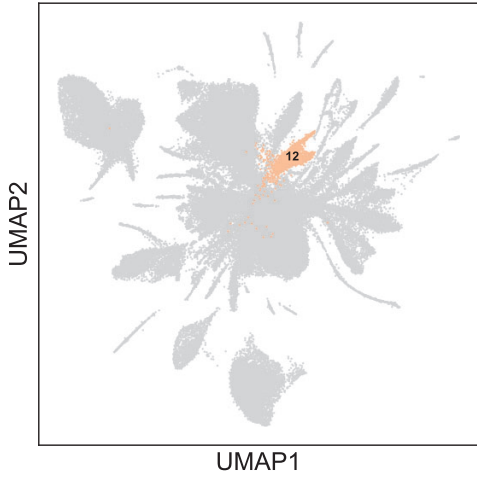

PrileiEVm000151t1

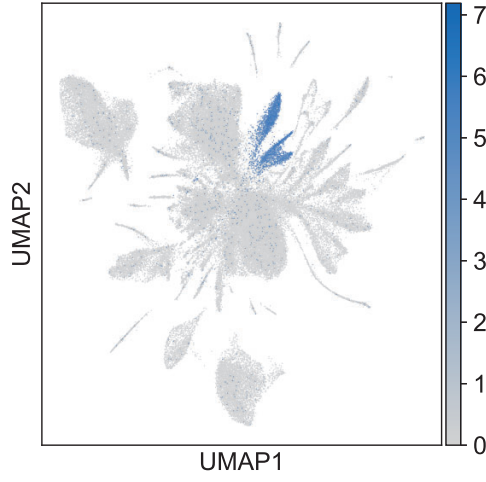

PrileiEVm010637t1

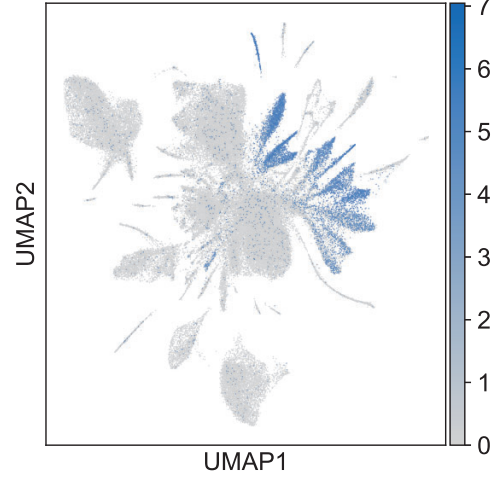

PrileiEVm019930t1

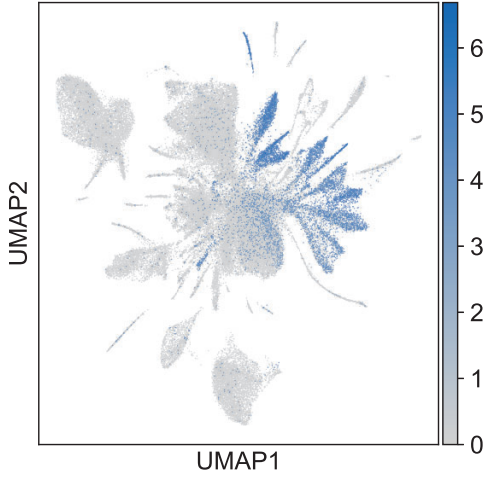

PrileiEVm020788t1

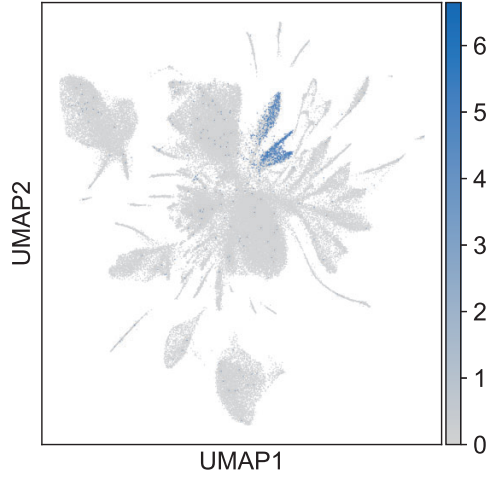

PrileiEVm000006t1

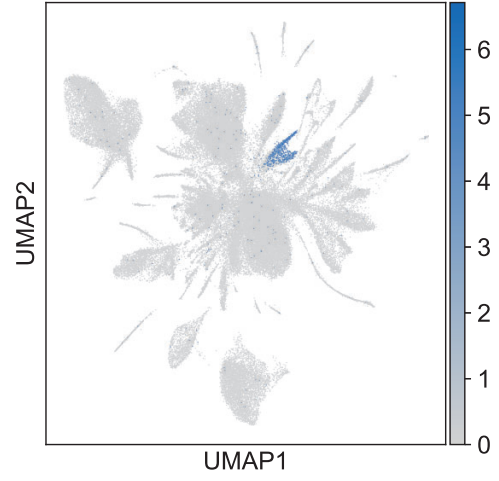

PrileiEVm021748t1

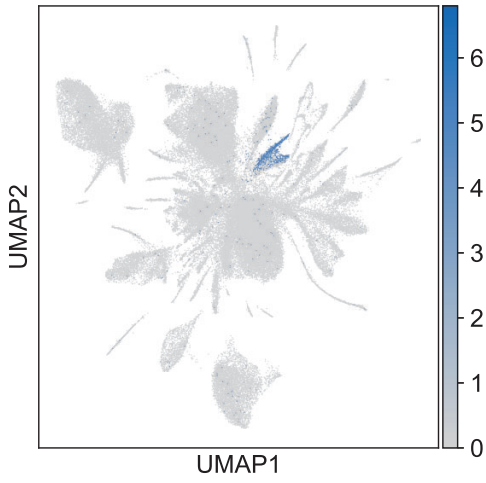

PrileiEVm004079t1

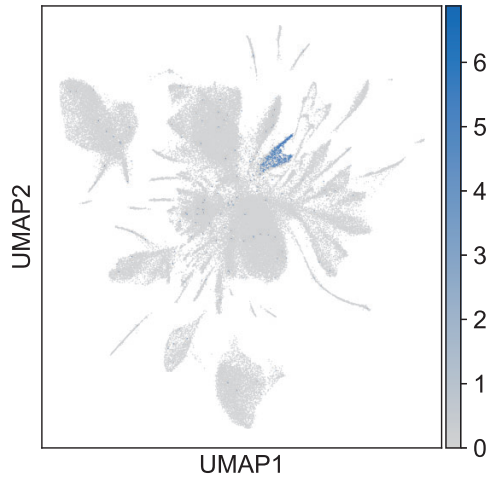

PrileiEVm019046t1

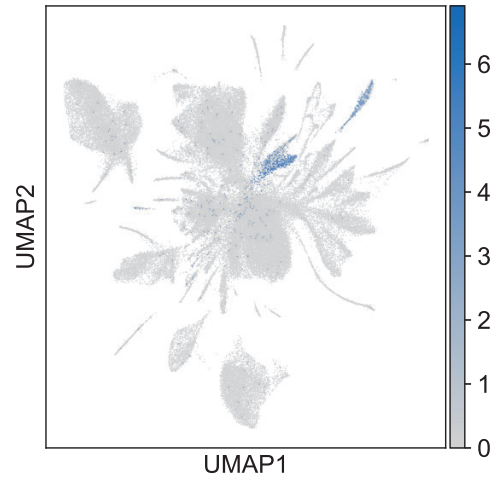

leiden\_1.5 cluster 13

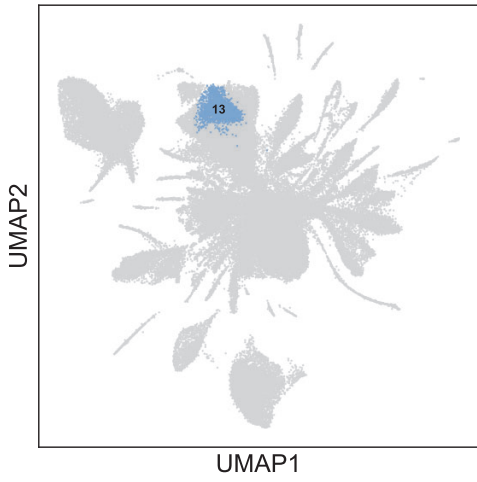

PrileiEVm016392t1

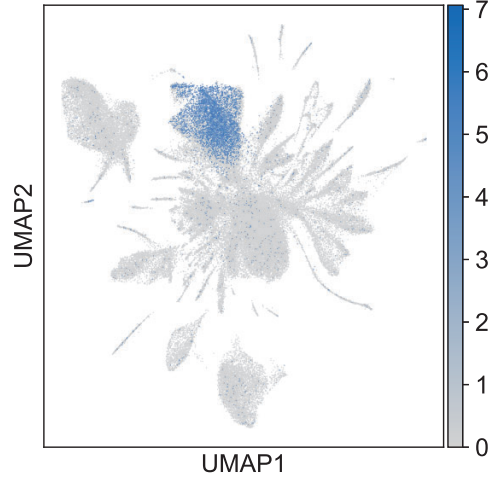

PrileiEVm008309t1

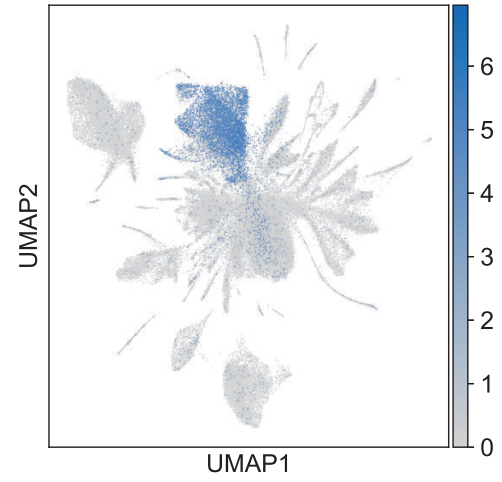

PrileiEVm001146t1

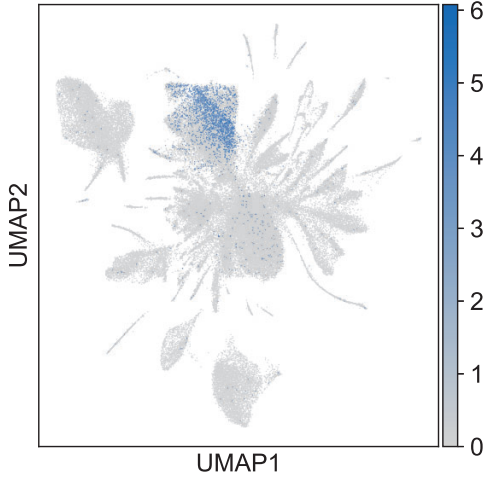

PrileiEVm027782t1

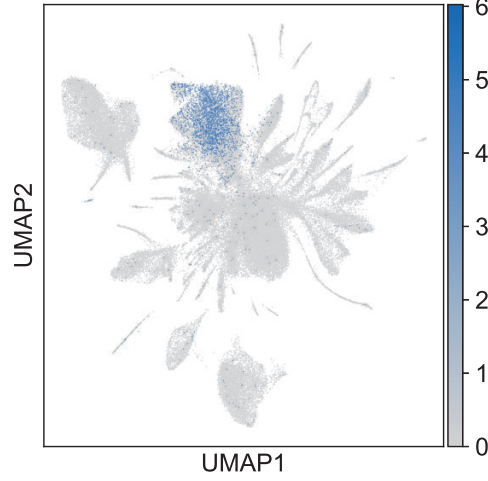

PrileiEVm018357t1

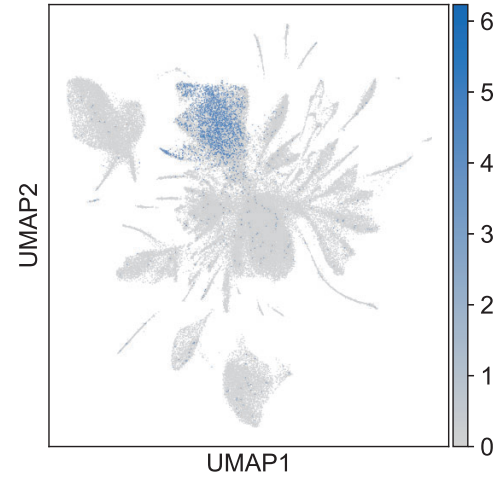

PrileiEVm002173t1

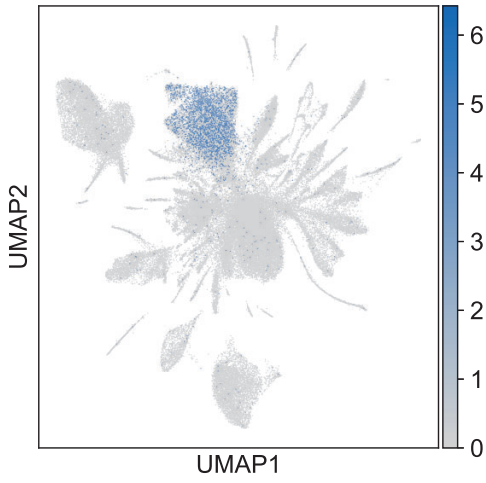

PrileiEVm020915t1

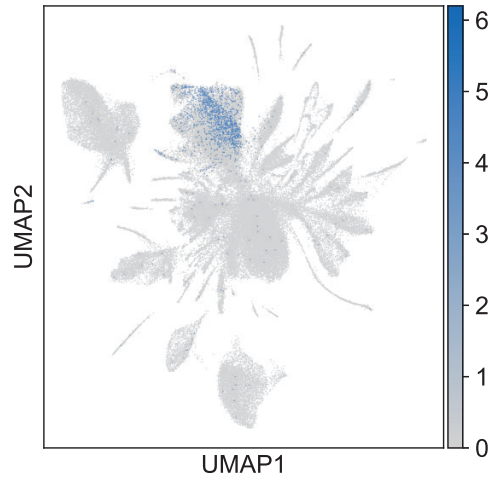

PrileiEVm014813t1

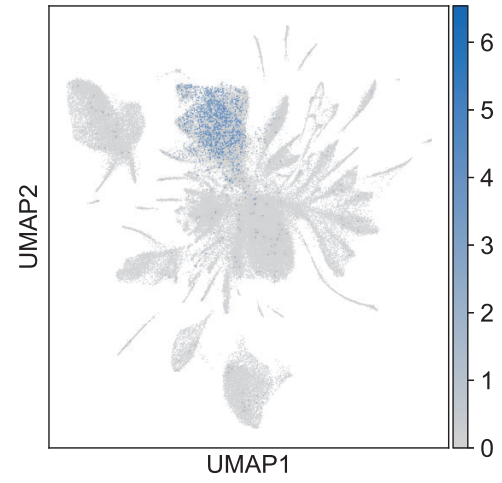

leiden\_1.5 cluster 14

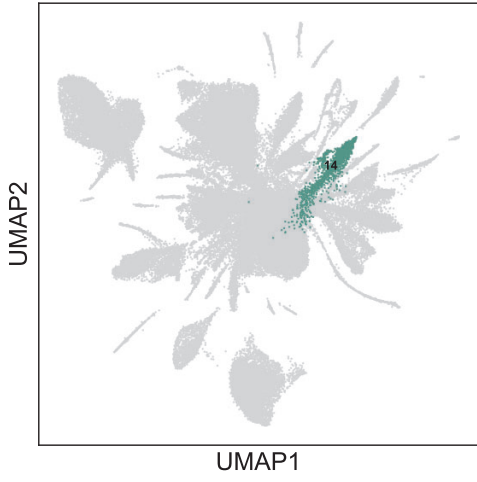

PrileiEVm021650t1

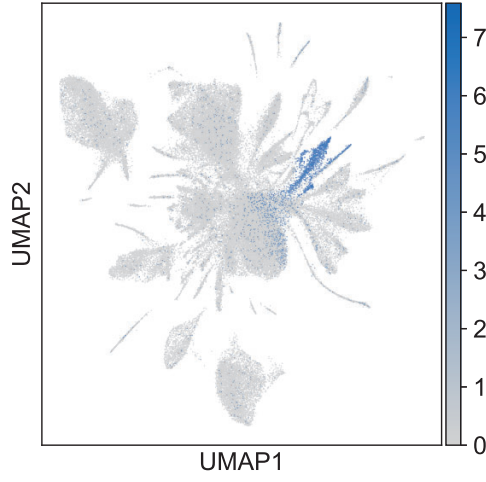

PrileiEVm019805t1

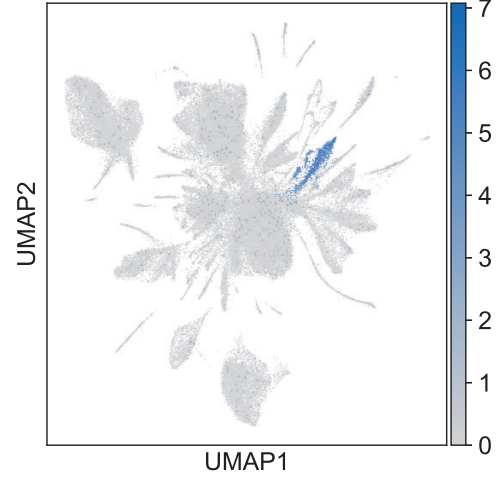

PrileiEVm021037t1

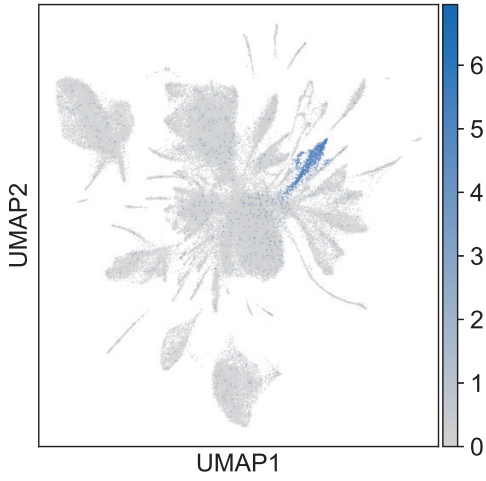

PrileiEVm007051t1

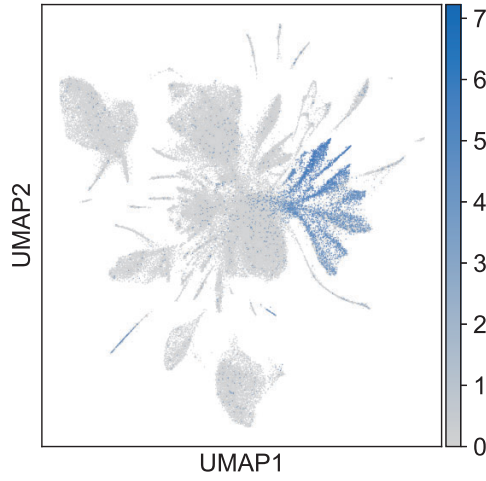

PrileiEVm022708t1

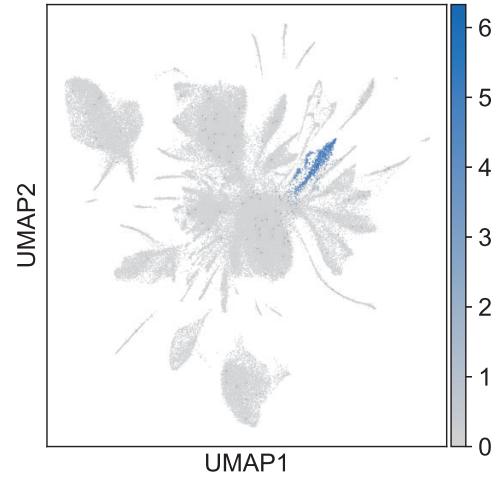

PrileiEVm021112t1

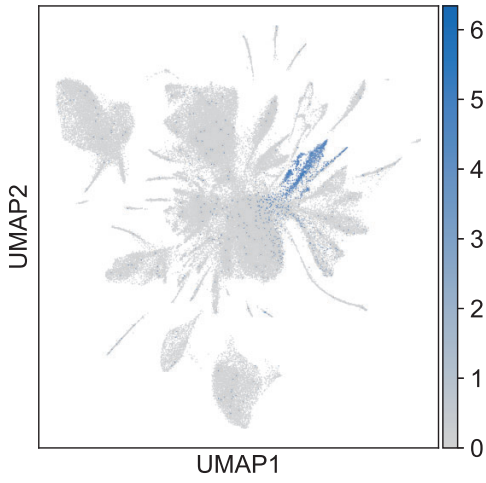

PrileiEVm021316t1

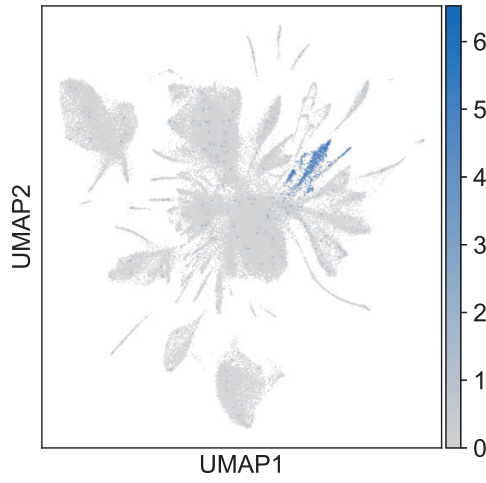

PrileiEVm016817t1

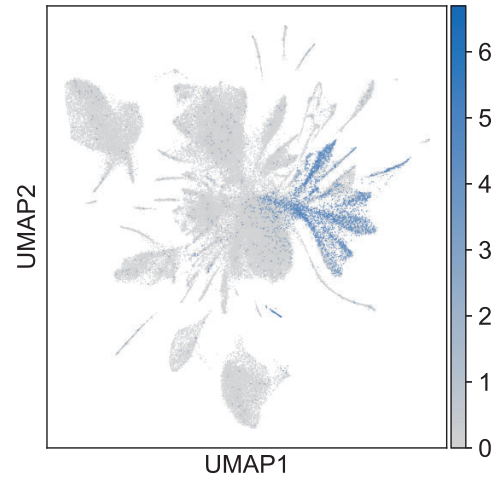



leiden\_1.5 cluster 15

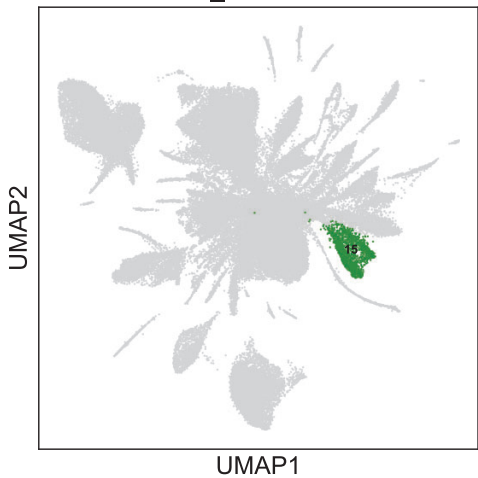

PrileiEVm021040t1

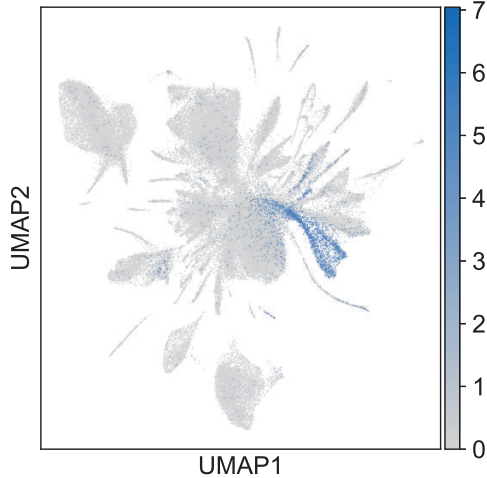

PrileiEVm002569t1

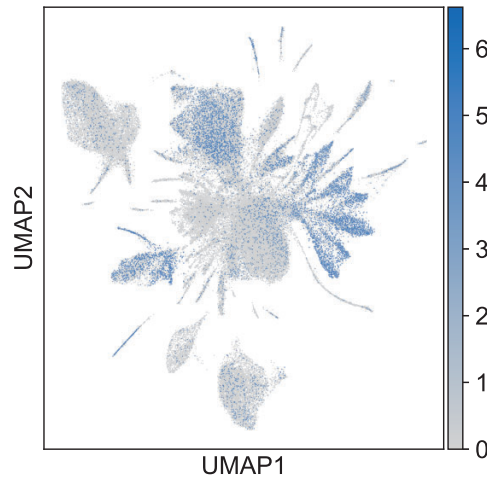

PrileiEVm013722t1

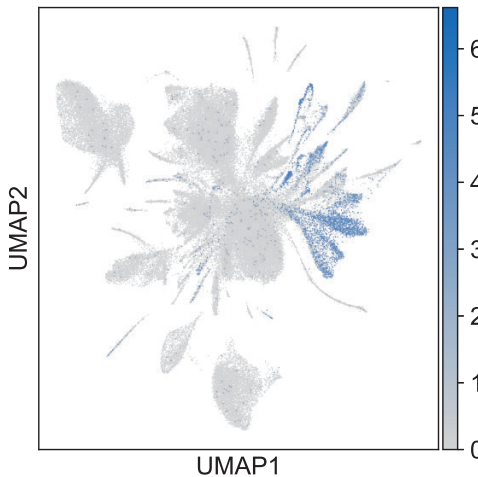

PrileiEVm010796t1

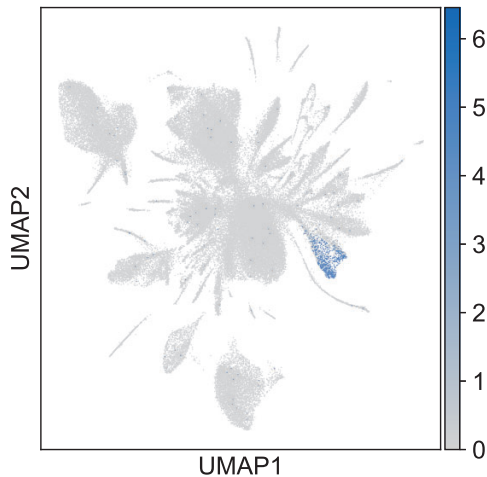

PrileiEVm000530t1

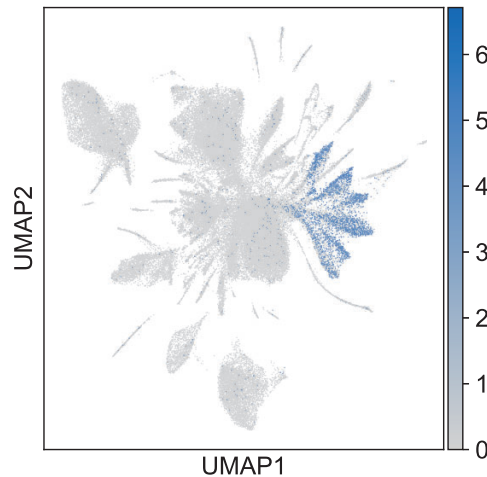

PrileiEVm010571t1

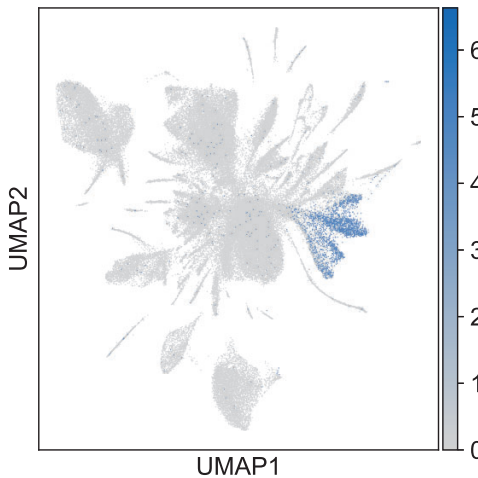

PrileiEVm007051t1

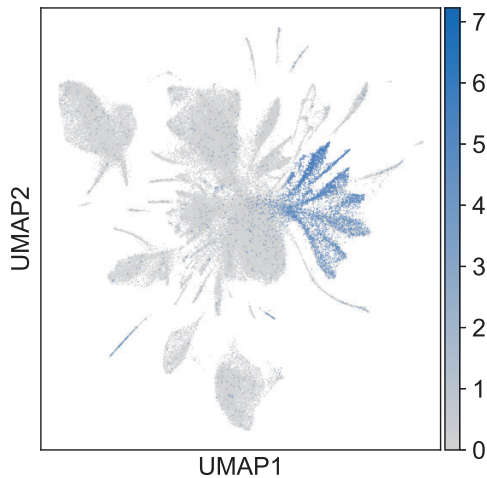

PrileiEVm010941t1

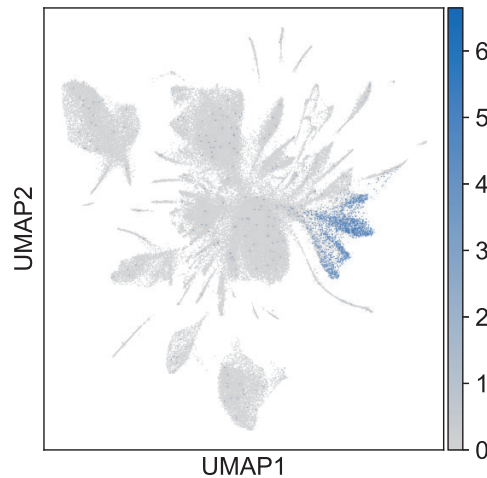



leiden\_1.5 cluster 16

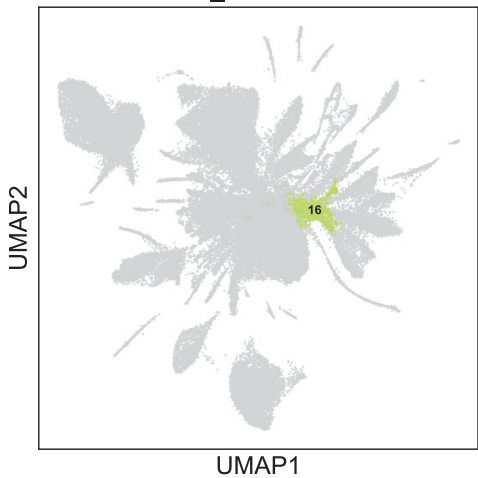

PrileiEVm016817t1

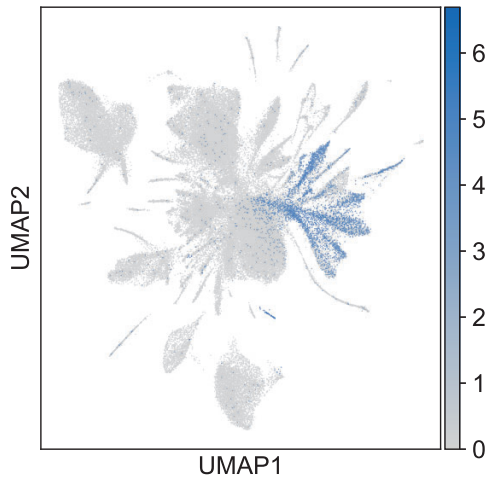

PrileiEVm021040t1

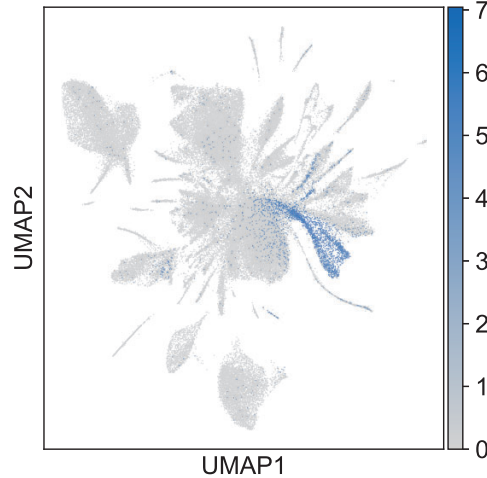

PrileiEVm007051t1

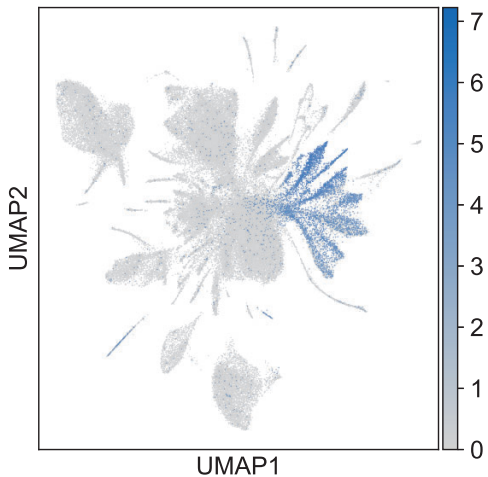

PrileiEVm004562t1

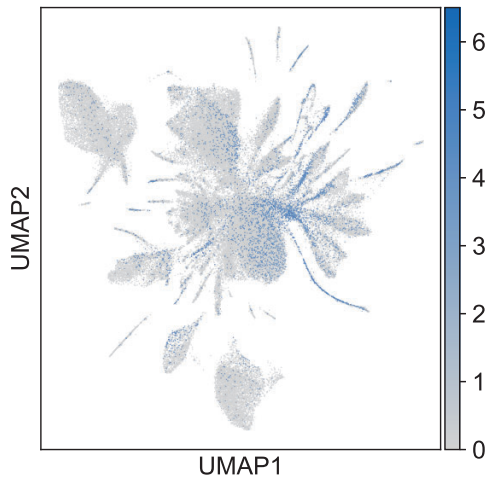

PrileiEVm022781t1

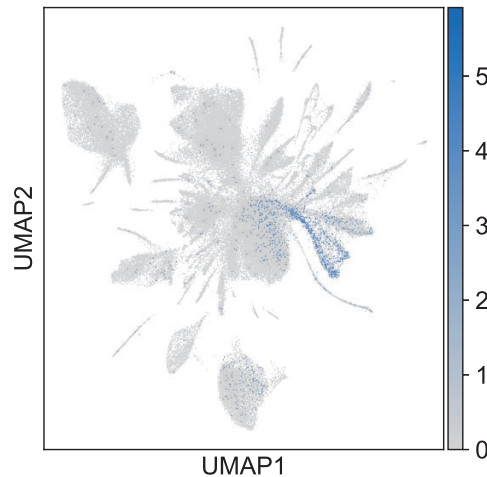

PrileiEVm019930t1

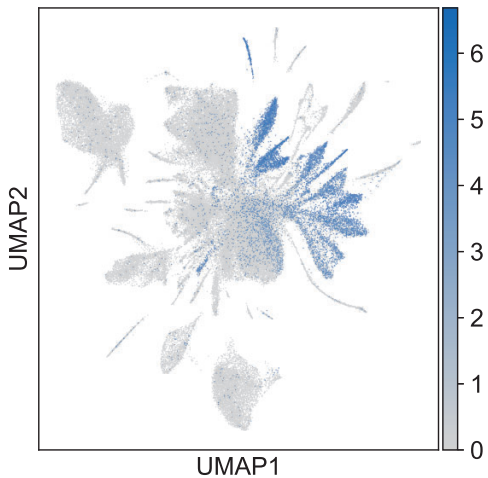

PrileiEVm000530t1

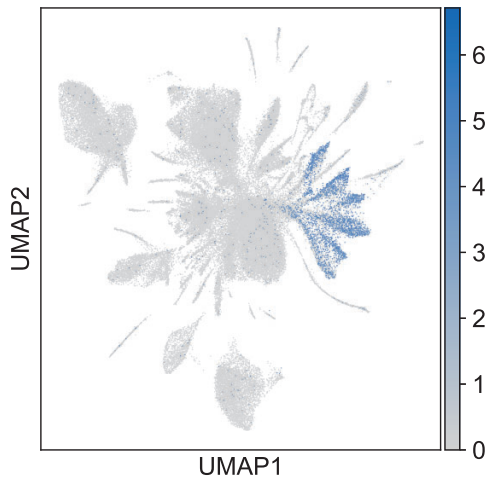

PrileiEVm016139t1

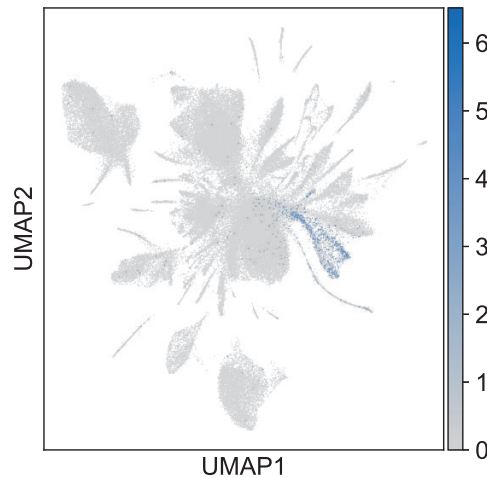

leiden\_1.5 cluster 17

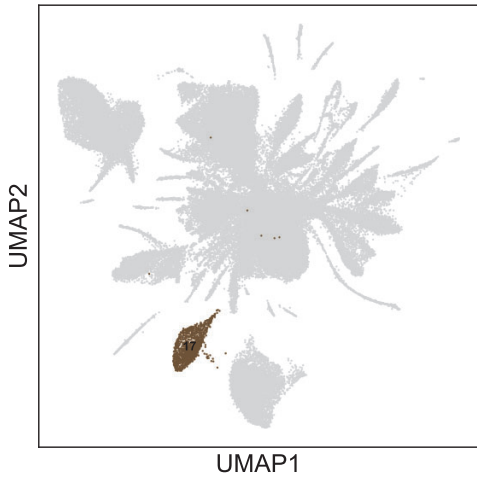

PrileiEVm000186t1

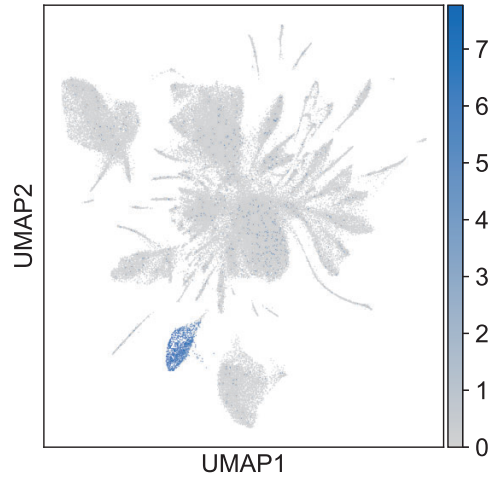

PrileiEVm022025t1

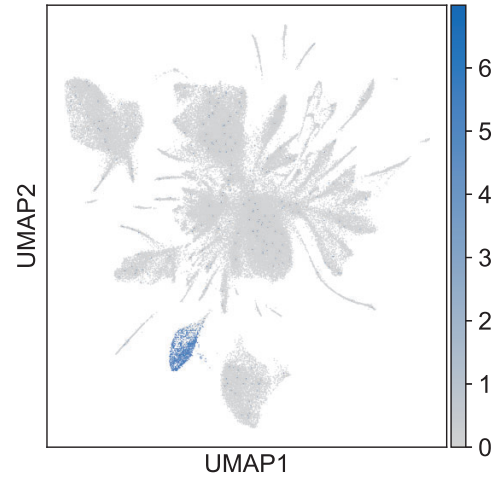

PrileiEVm017899t1

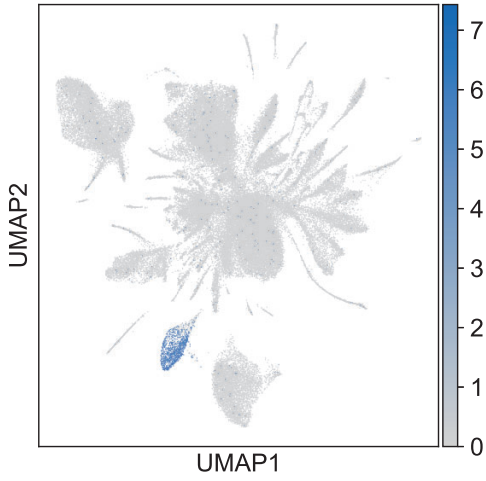

PrileiEVm000278t1

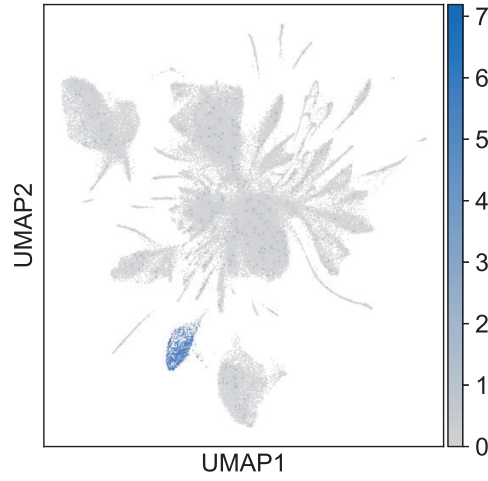

PrileiEVm008087t1

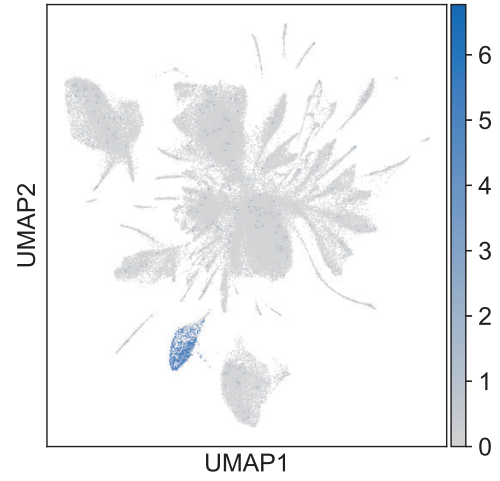

PrileiEVm017425t1

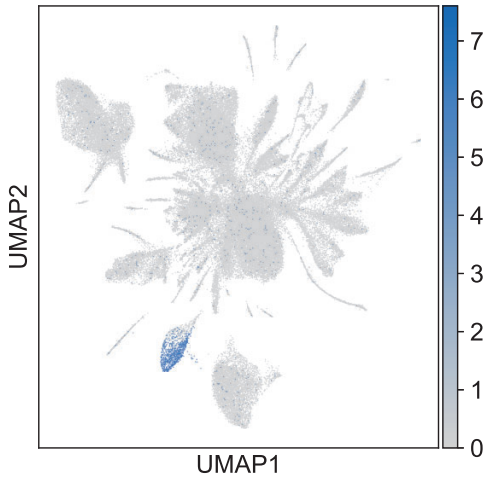

PrileiEVm016058t1

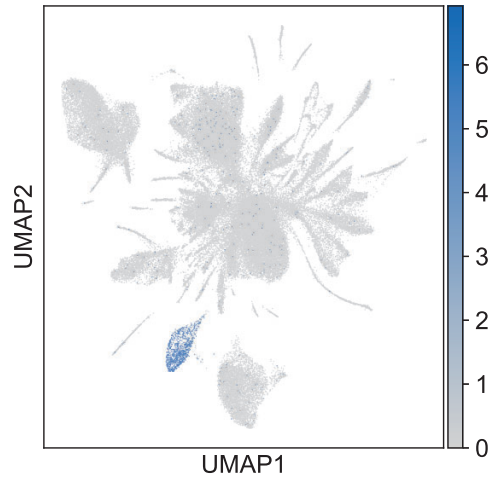

PrileiEVm000320t1

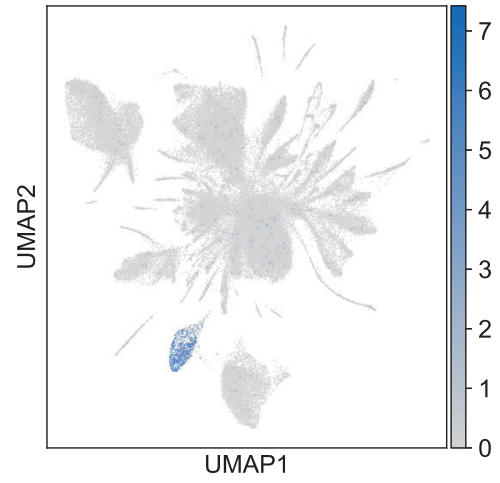

leiden\_1.5 cluster 18

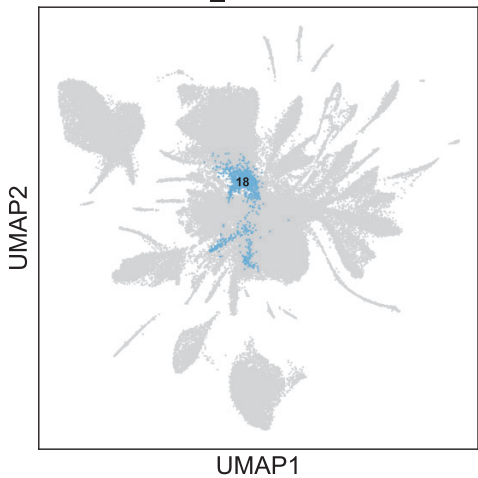

PrileiEVm002081t1

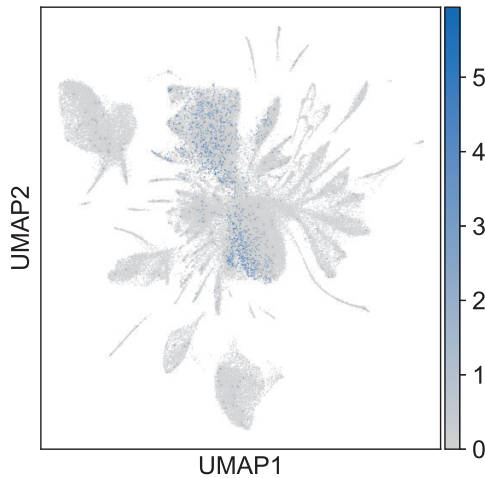

PrileiEVm006219t1

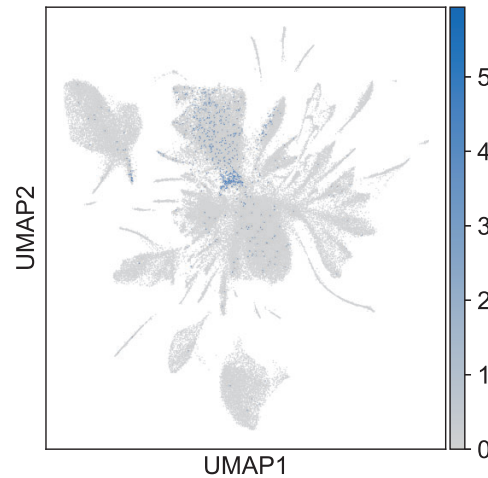

PrileiEVm000937t1

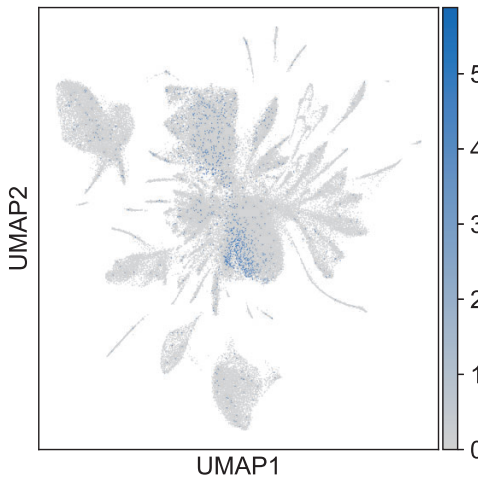

PrileiEVm010112t1

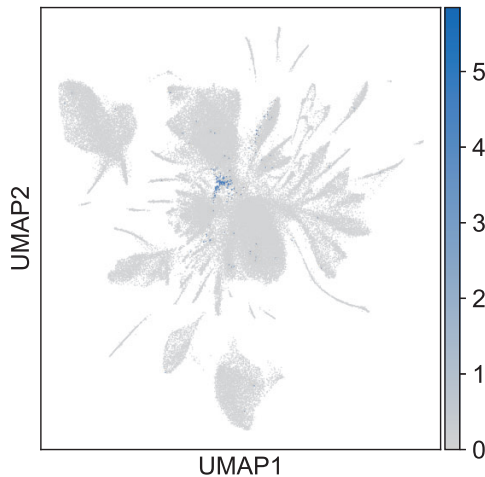

PrileiEVm003940t1

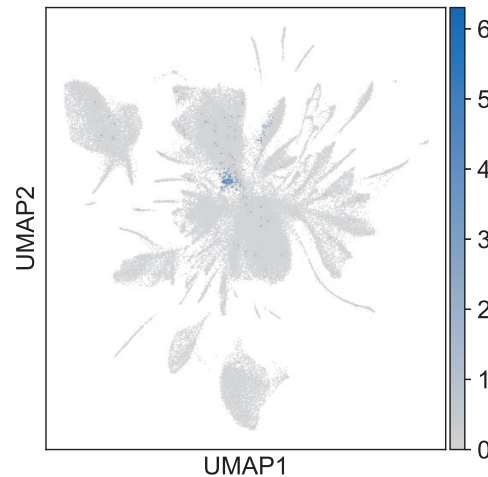

PrileiEVm014478t1

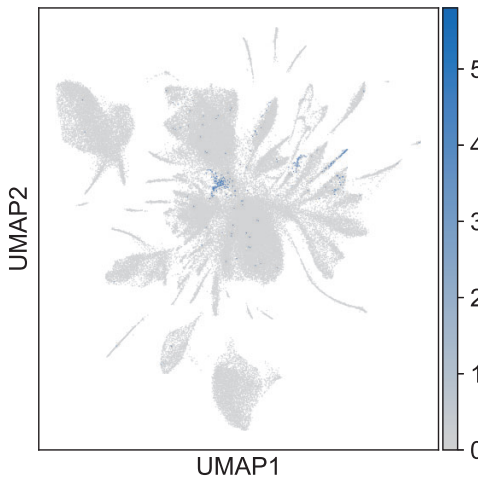

PrileiEVm007494t1

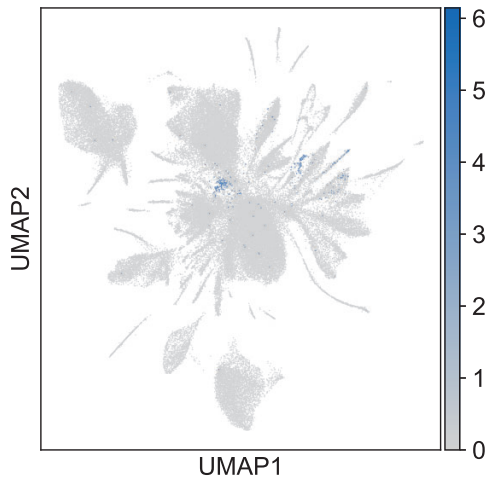

PrileiEVm019750t1

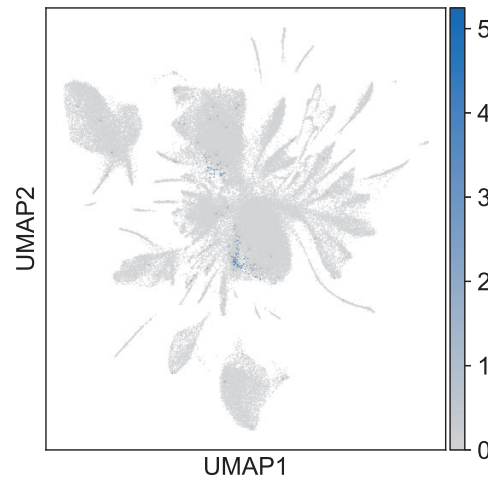



leiden\_1.5 cluster 19

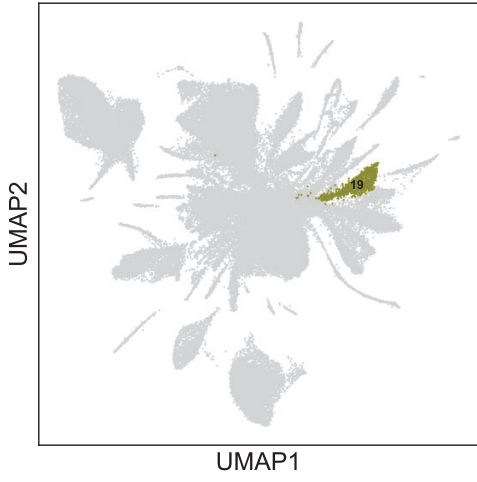

PrileiEVm007051t1

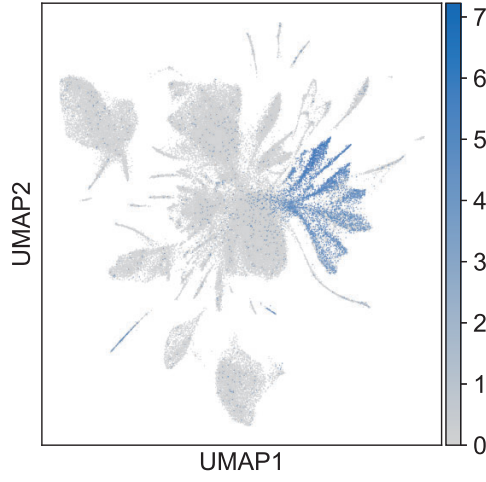

PrileiEVm010637t1



PrileiEVm021206t1

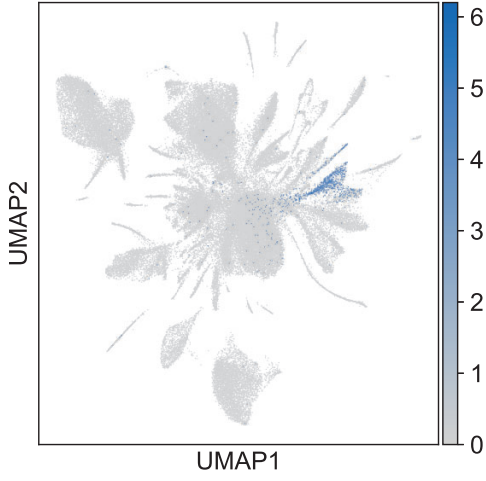

PrileiEVm022250t1

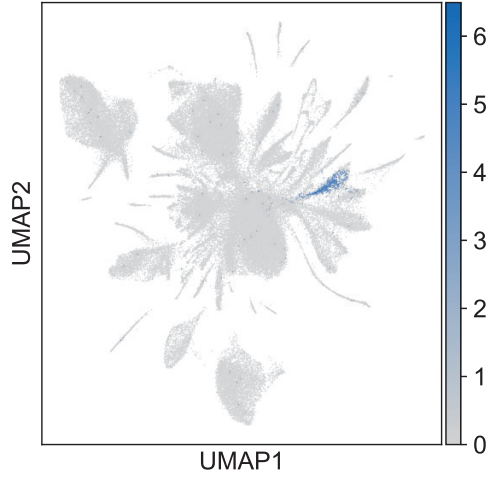

PrileiEVm000530t1

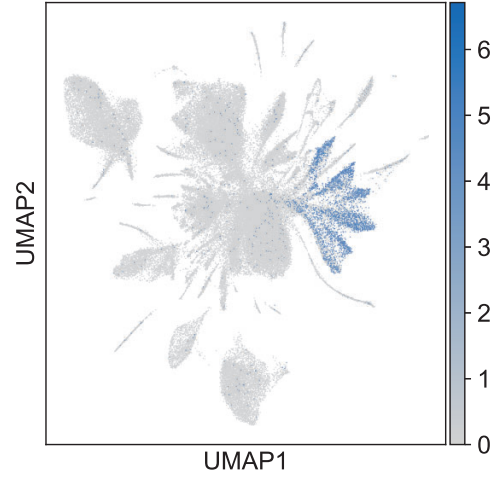

PrileiEVm019930t1

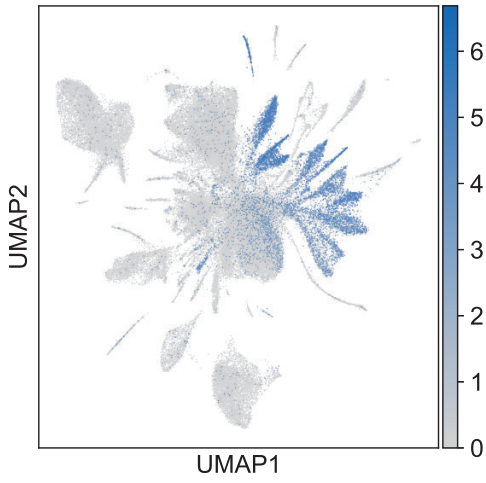

PrileiEVm021813t1

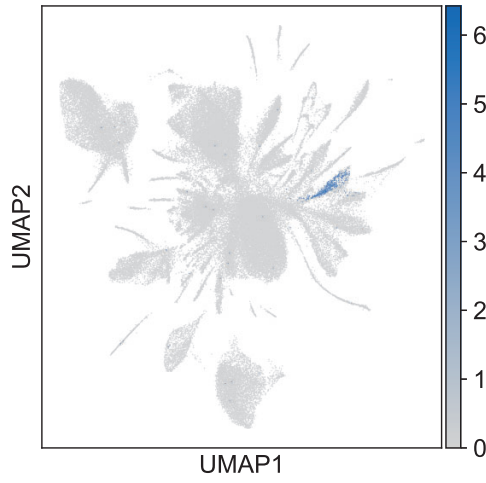

PrileiEVm015026t1

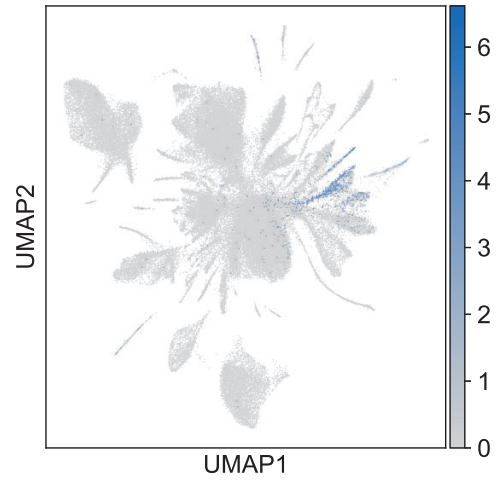



leiden\_1.5 cluster 20

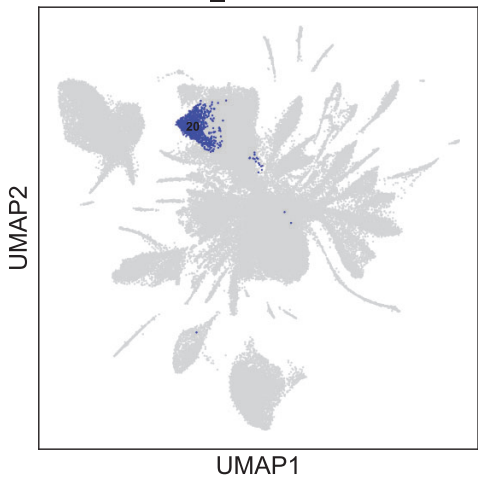

PrileiEVm000089t1

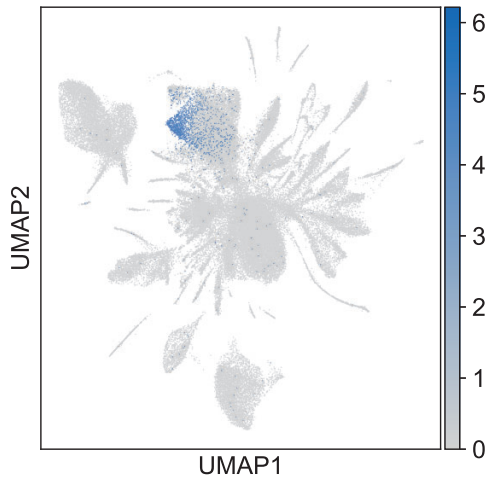

PrileiEVm000389t1

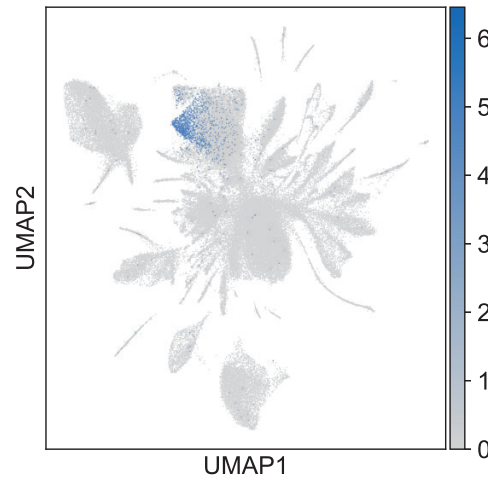

PrileiEVm001072t1

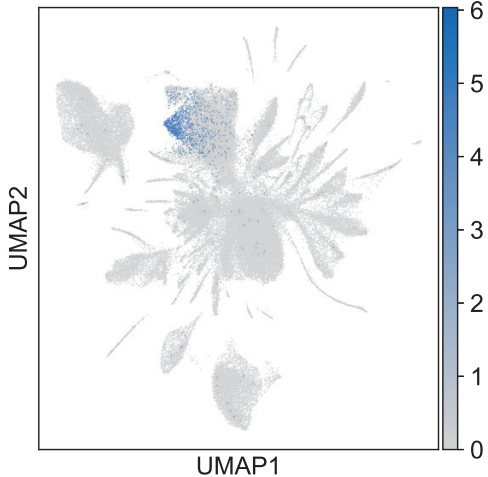

PrileiEVm000041t1

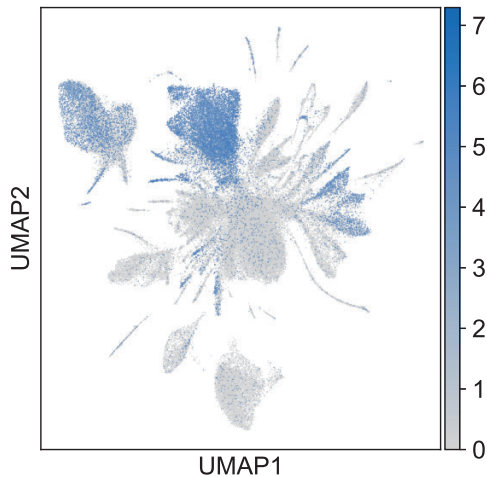

PrileiEVm000507t1

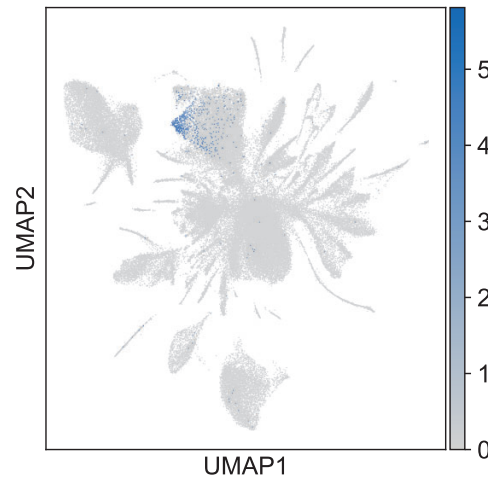

PrileiEVm008309t1

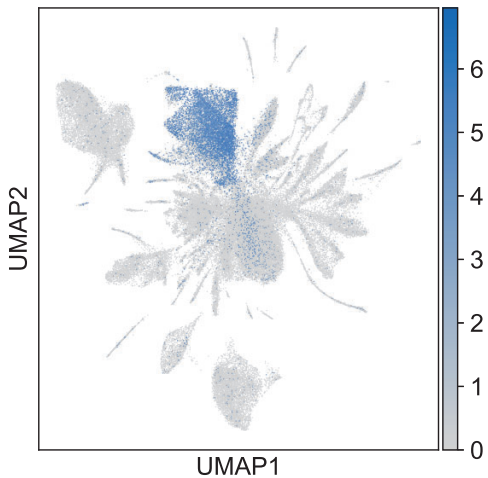

PrileiEVm000378t1

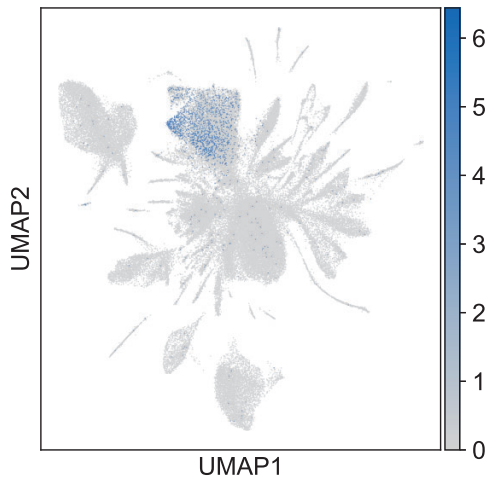

PrileiEVm016392t1

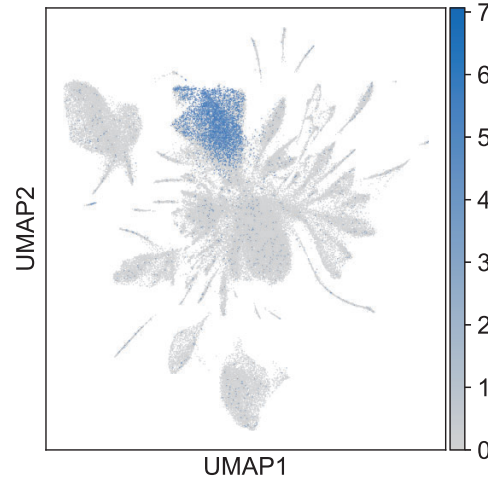

leiden\_1.5 cluster 21

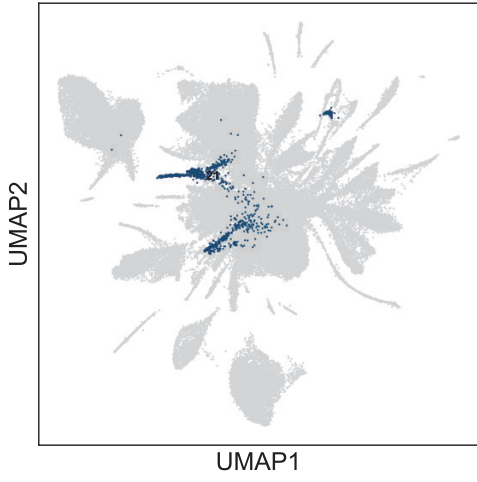

PrileiEVm007502t1

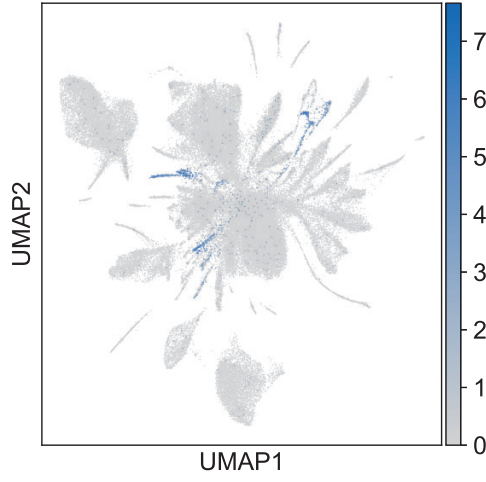

PrileiEVm007758t1

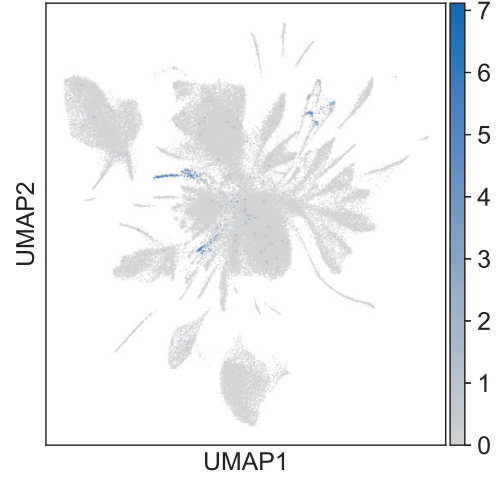

PrileiEVm006657t1

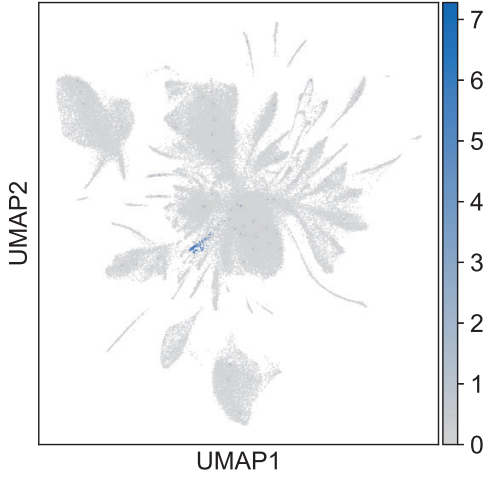

PrileiEVm015194t1

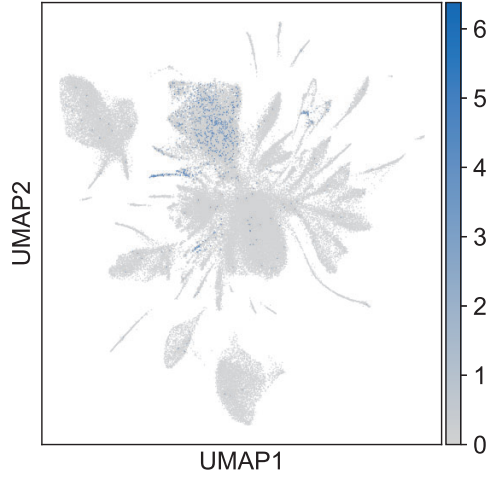

PrileiEVm011066t1

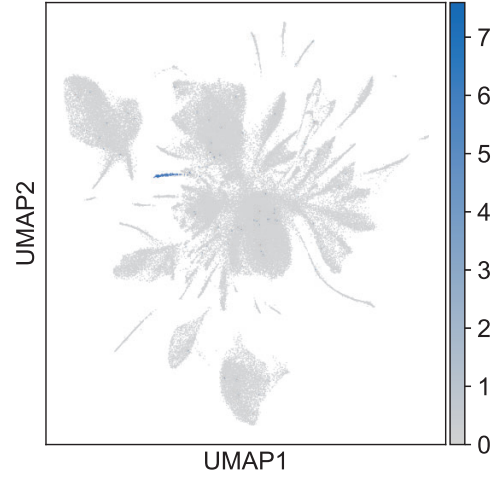

PrileiEVm000015t1

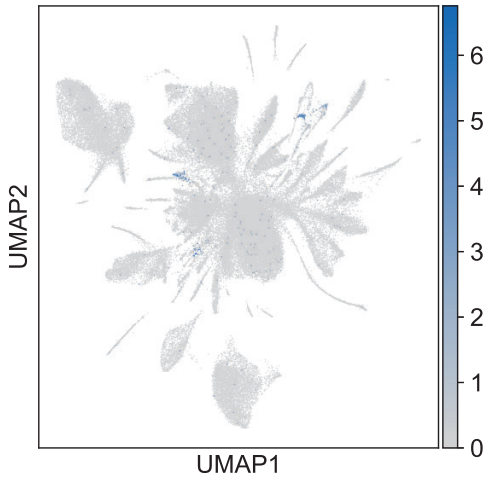

PrileiEVm000939t1

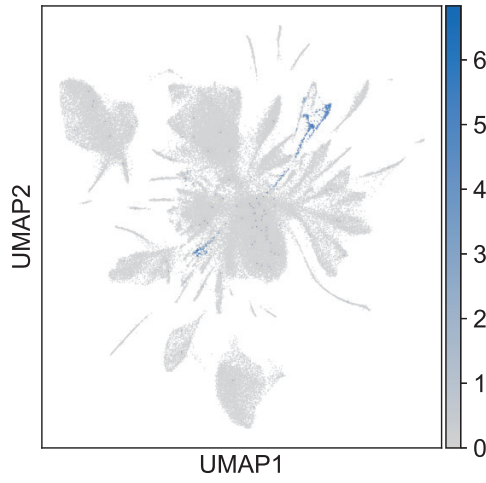

PrileiEVm031285t1

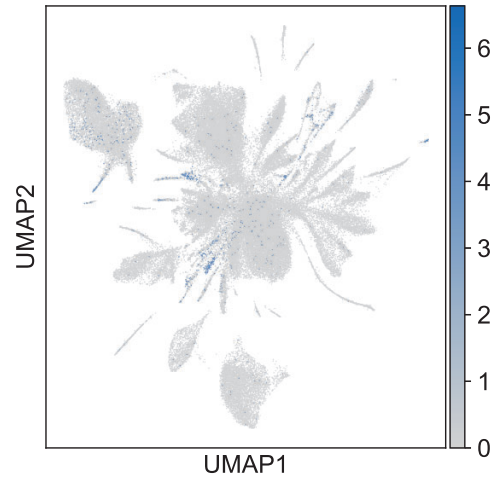

leiden\_1.5 cluster 22

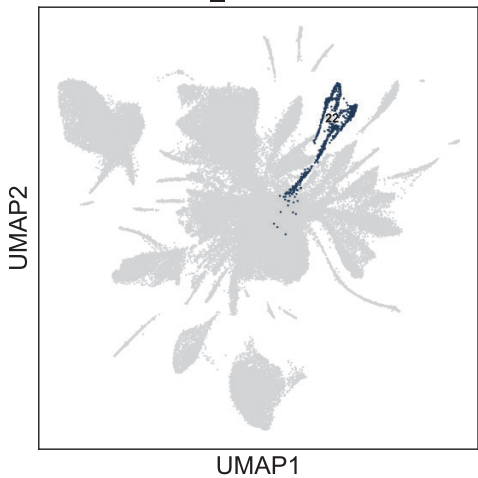

PrileiEVm023991t1

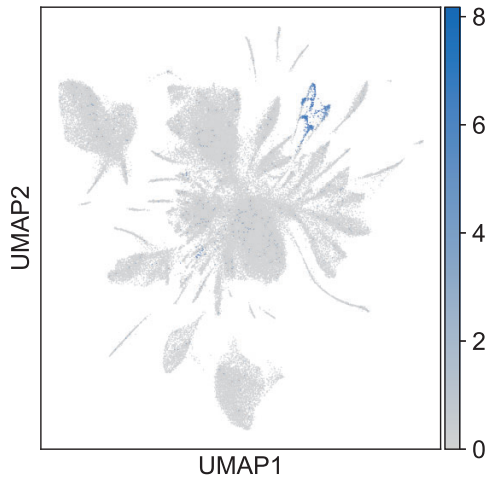

PrileiEVm014114t1

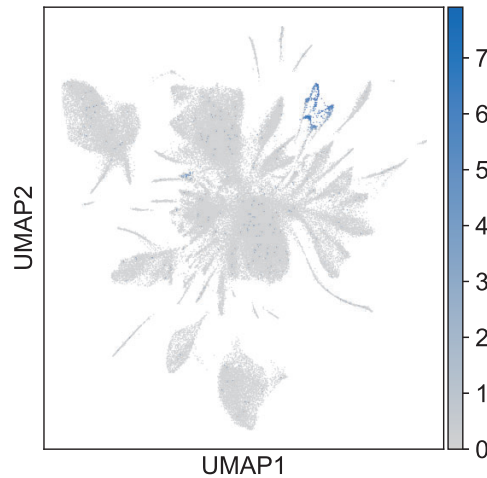

PrileiEVm000939t1

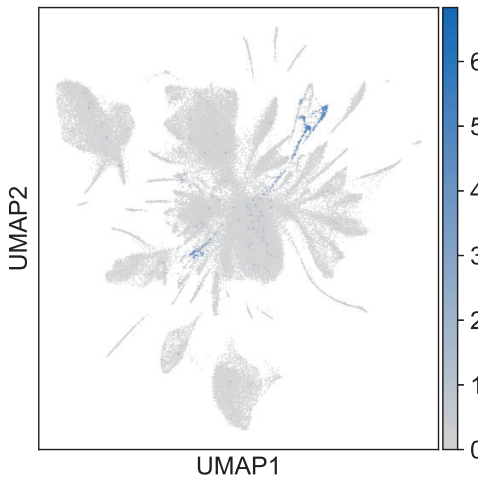

PrileiEVm002204t1

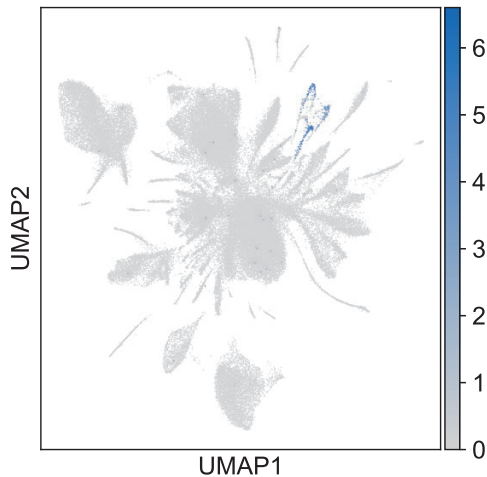

PrileiEVm023702t1

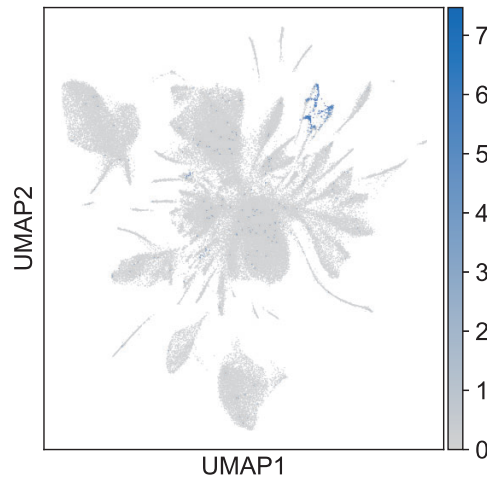

PrileiEVm003758t1

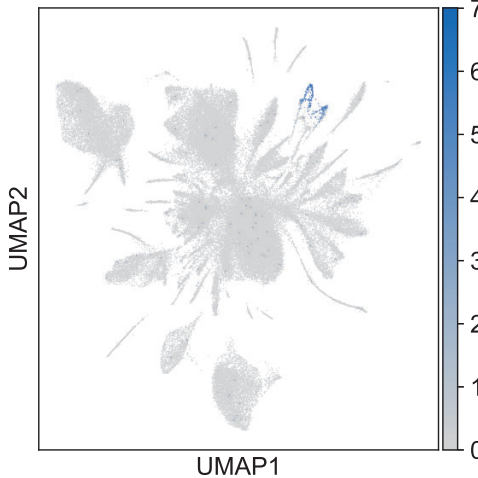

PrileiEVm003938t1

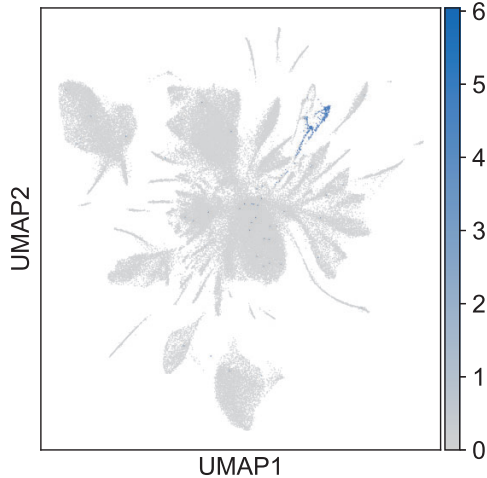

PrileiEVm019313t1

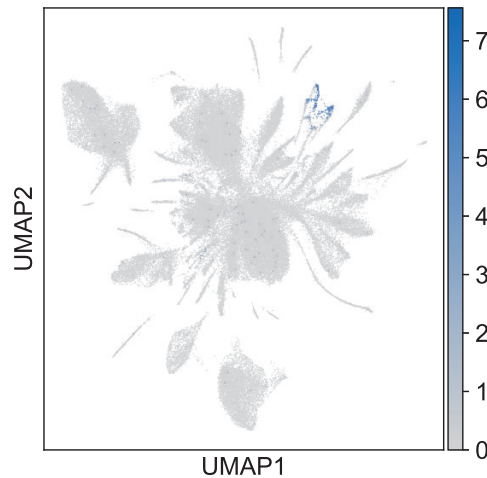



leiden\_1.5 cluster 23

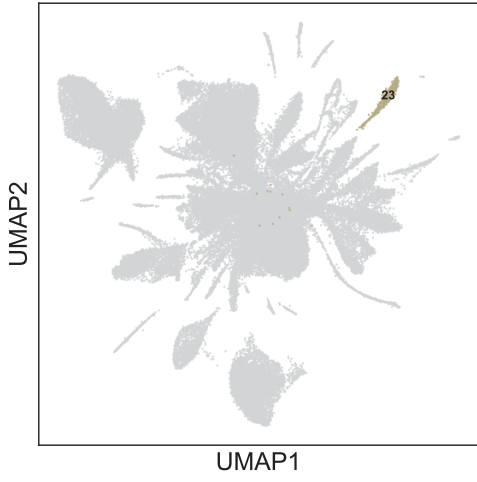

PrileiEVm019973t1

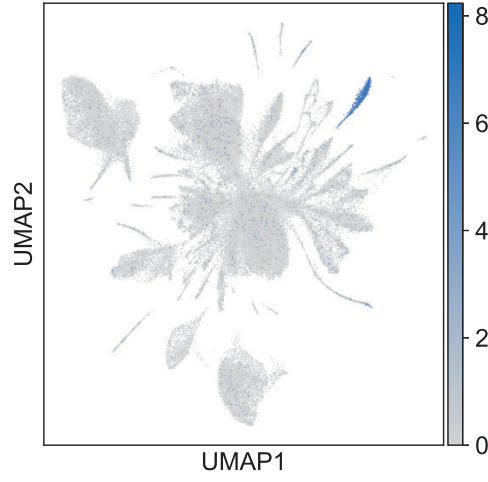

PrileiEVm012391t1

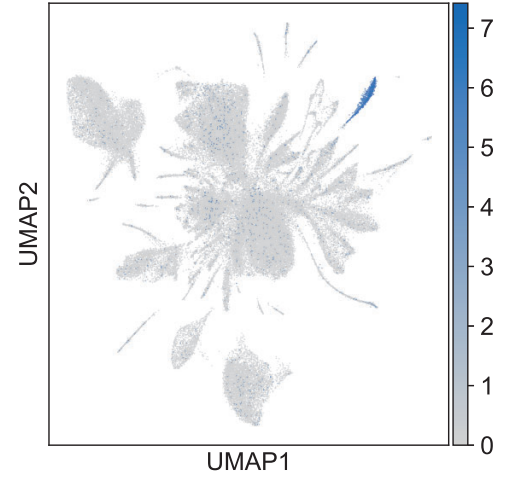

PrileiEVm010211t1

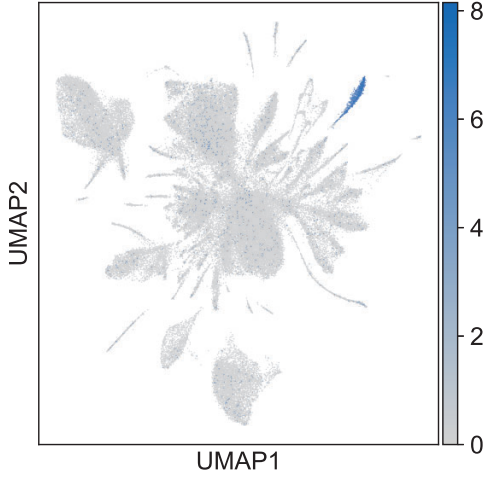

PrileiEVm018291t1

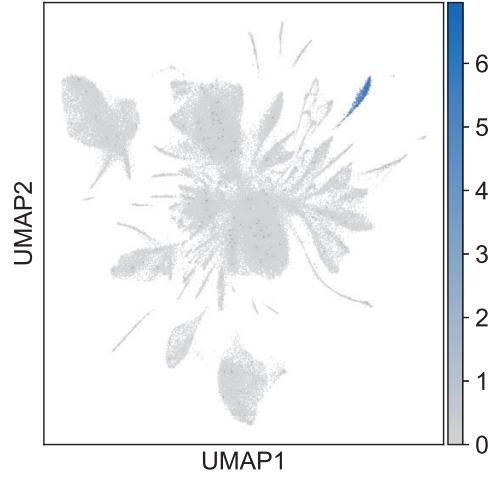

PrileiEVm027093t1

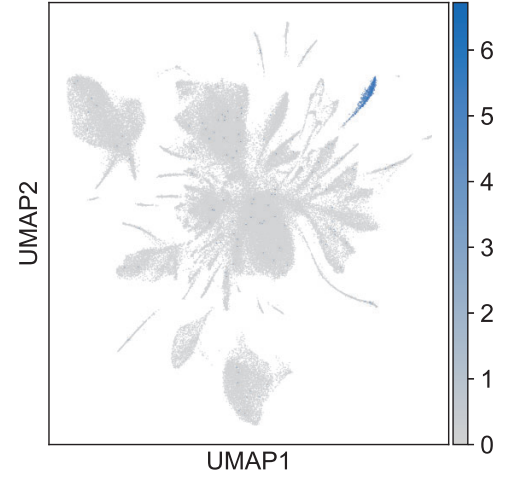

PrileiEVm025030t1

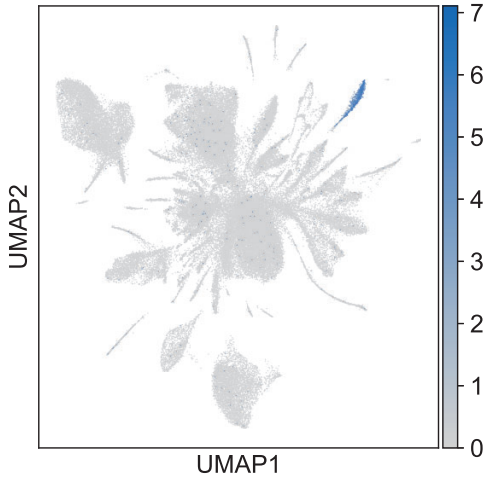

PrileiEVm028023t1

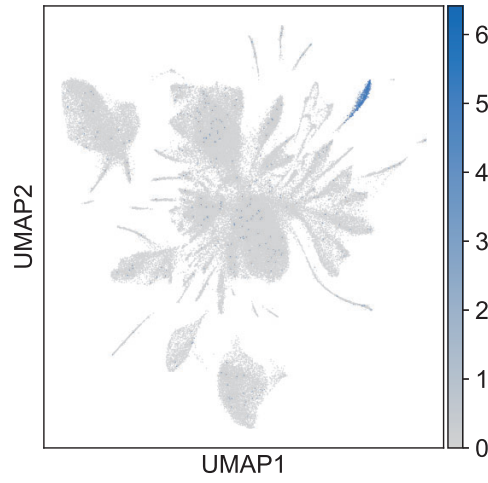

PrileiEVm009432t1

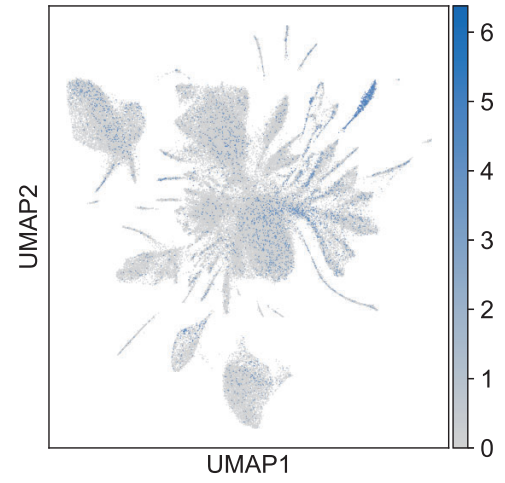

leiden\_1.5 cluster 24

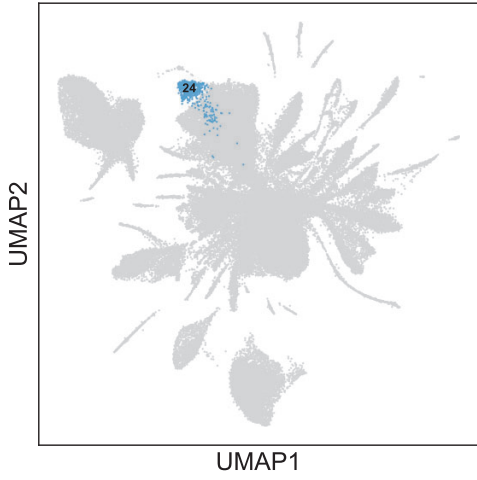

PrileiEVm026851t1

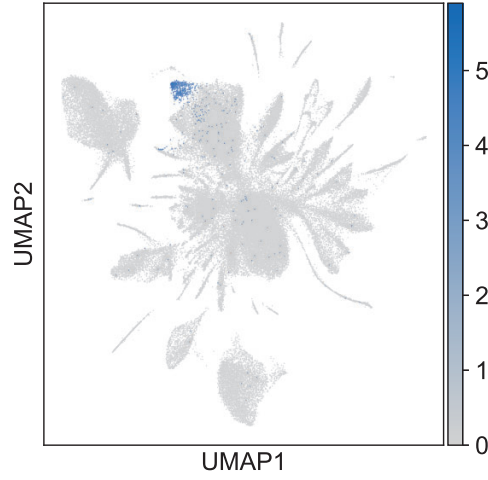

PrileiEVm022007t1

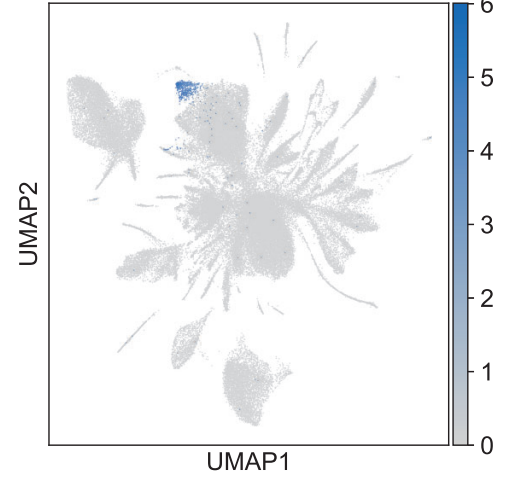

PrileiEVm028657t1

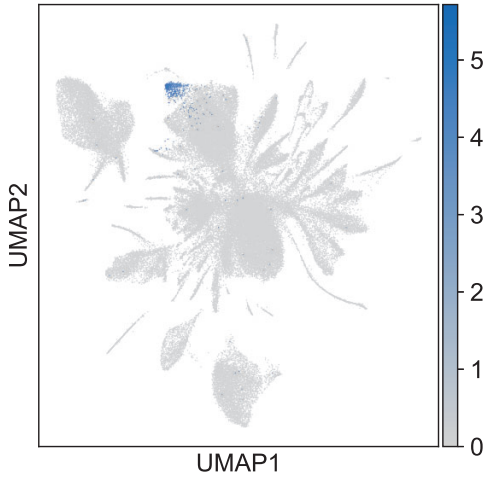

PrileiEVm001963t1

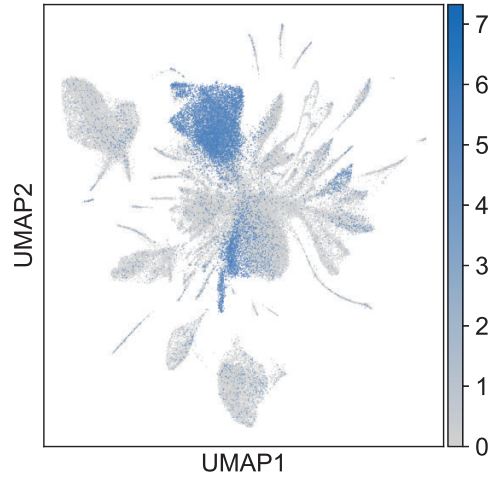

PrileiEVm021489t1

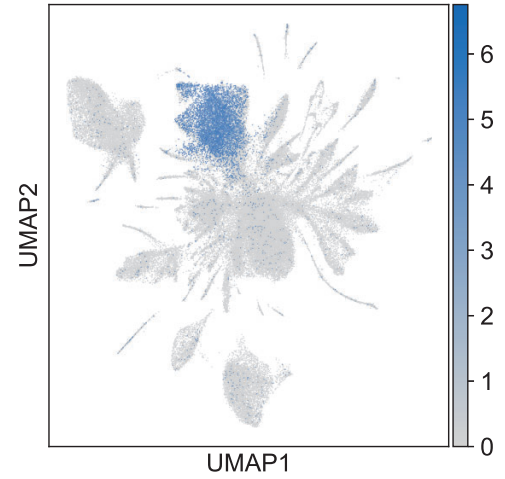

PrileiEVm000041t1

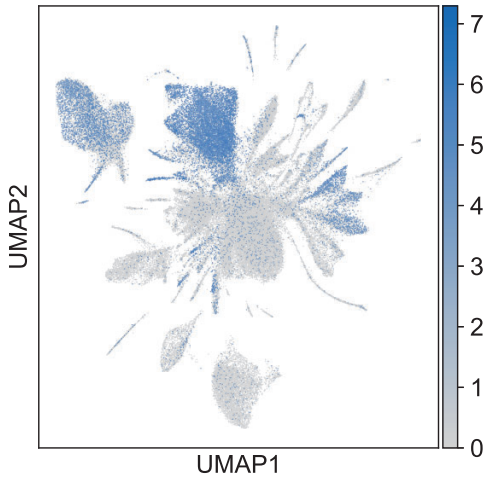

PrileiEVm008287t1

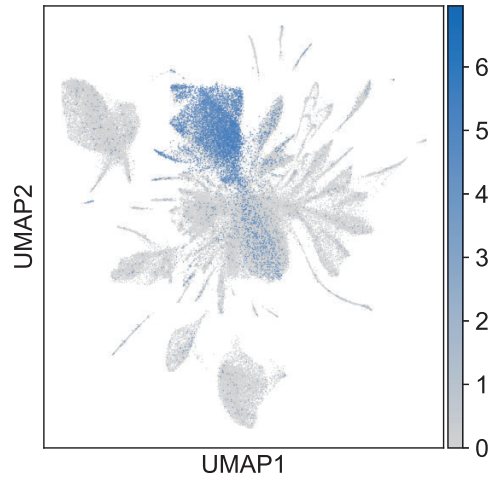

PrileiEVm025388t1

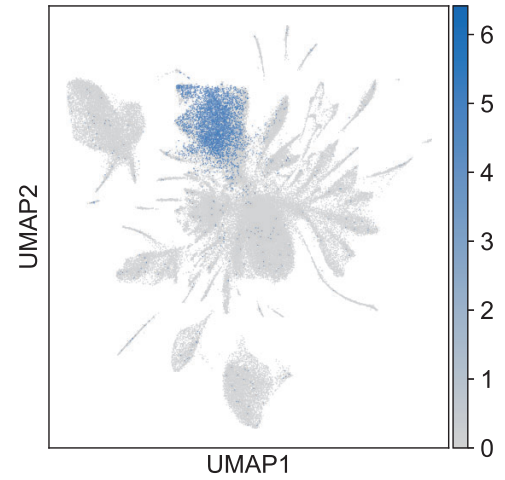

leiden\_1.5 cluster 25

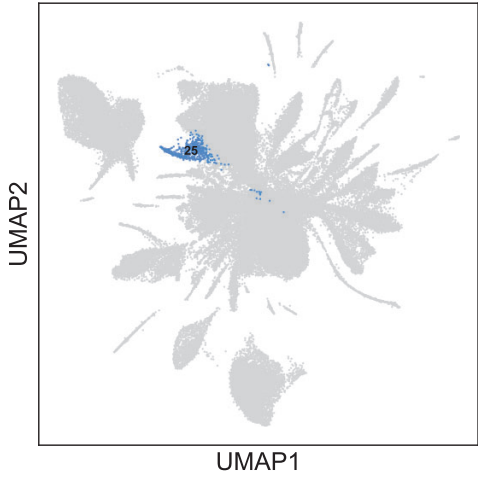

PrileiEVm023253t1

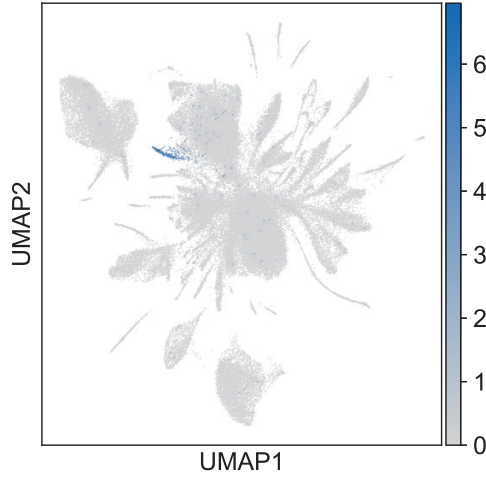

PrileiEVm023368t1

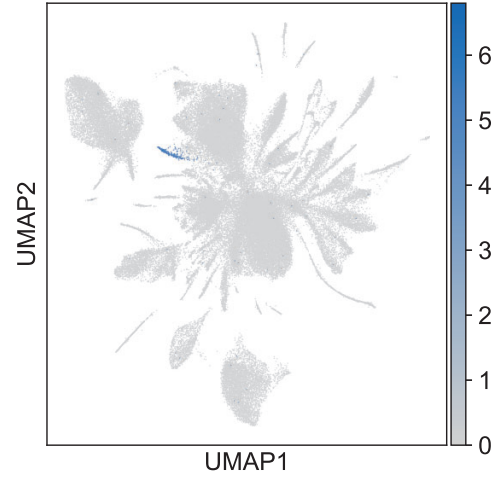

PrileiEVm013615t1

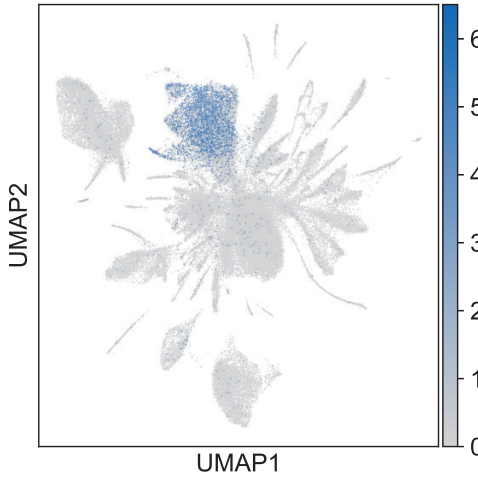

PrileiEVm016937t1

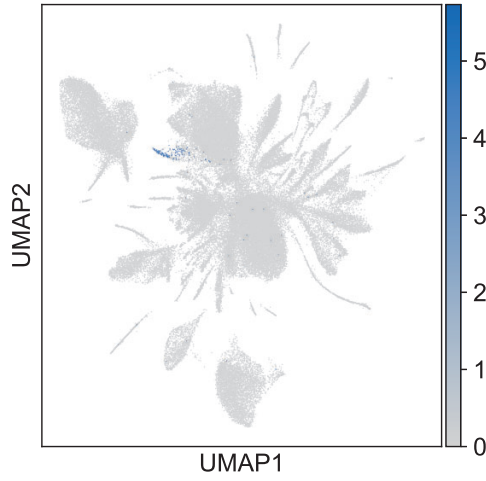

PrileiEVm017936t1

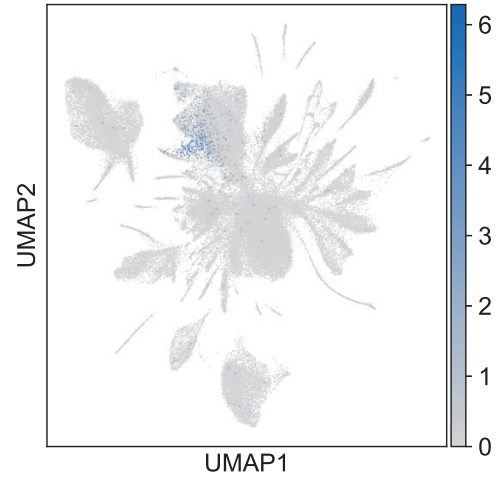

PrileiEVm022655t1

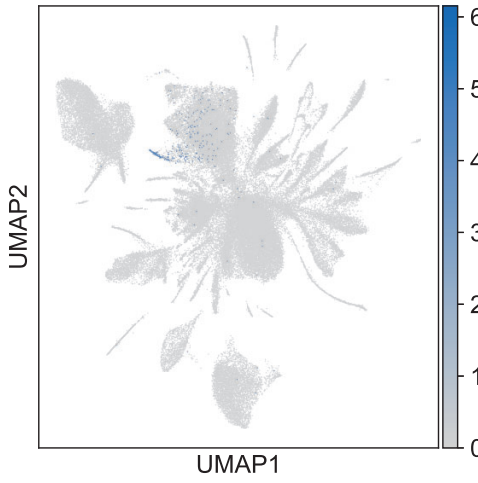

PrileiEVm004988t1

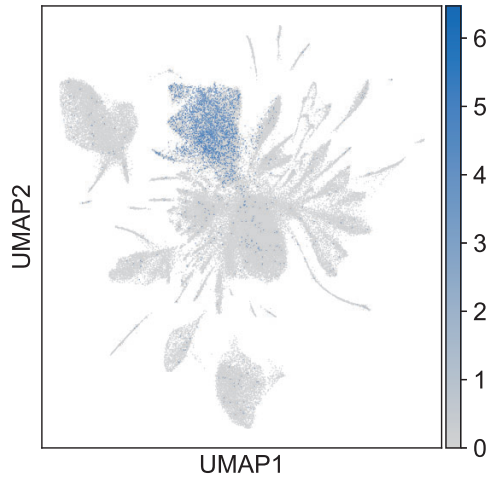

PrileiEVm016451t1

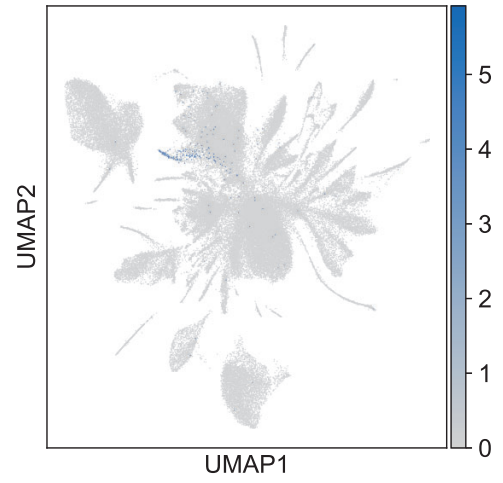



leiden\_1.5 cluster 26

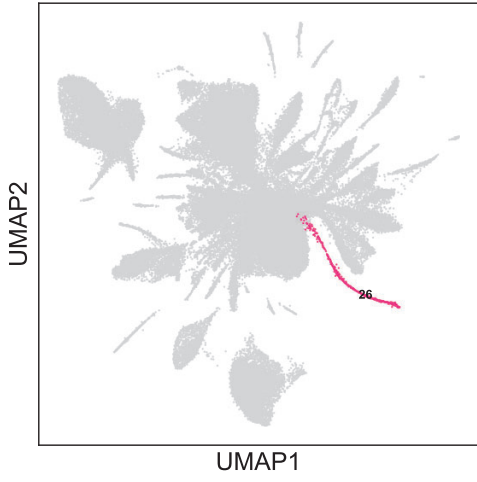

PrileiEVm017448t1

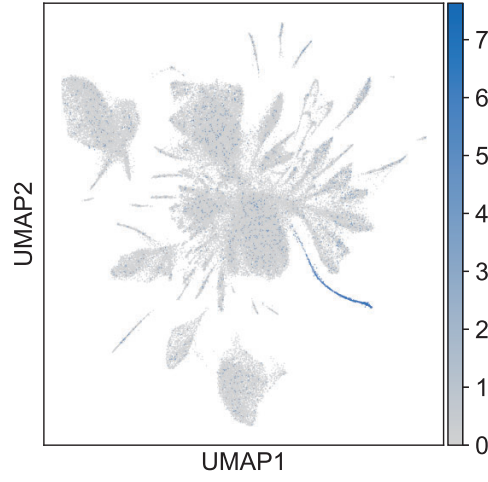

PrileiEVm016387t1

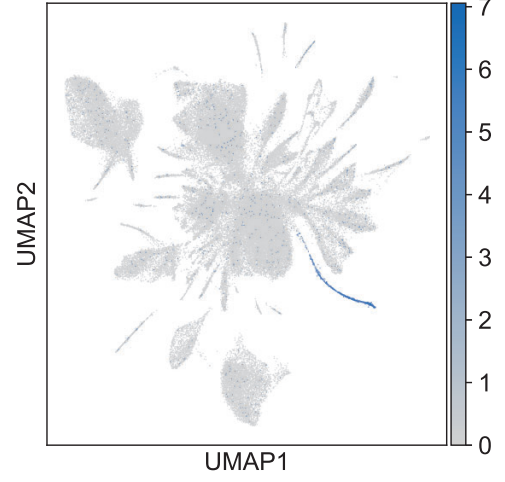

PrileiEVm020424t1

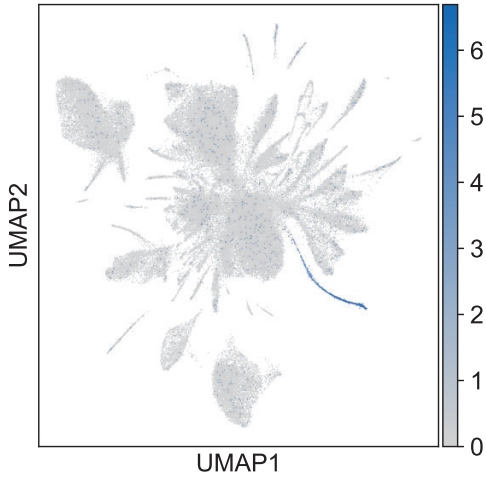

PrileiEVm016047t1

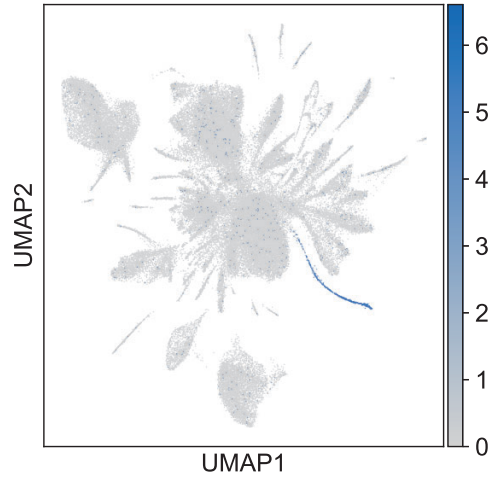

PrileiEVm012462t1

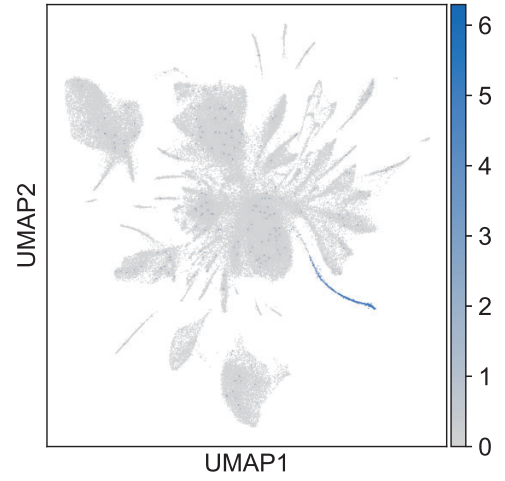

PrileiEVm012301t1

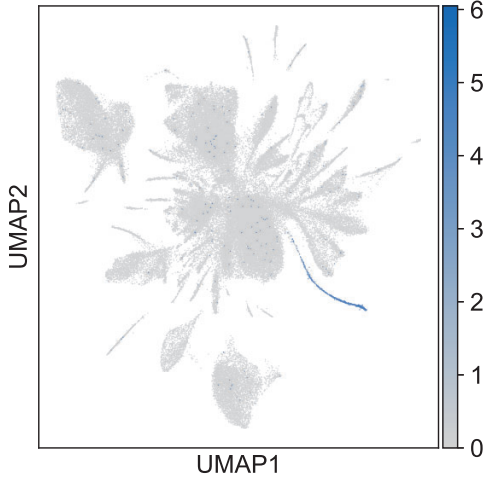

PrileiEVm016330t1

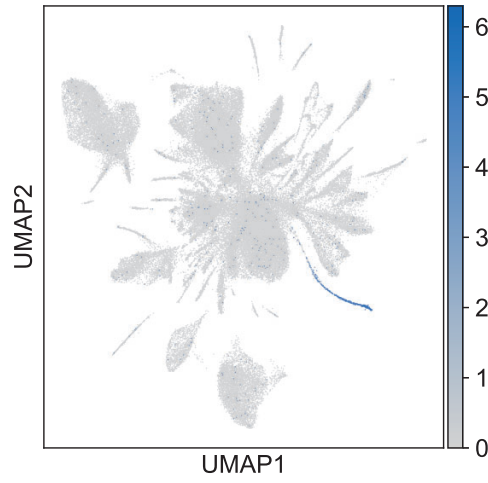

PrileiEVm016446t1

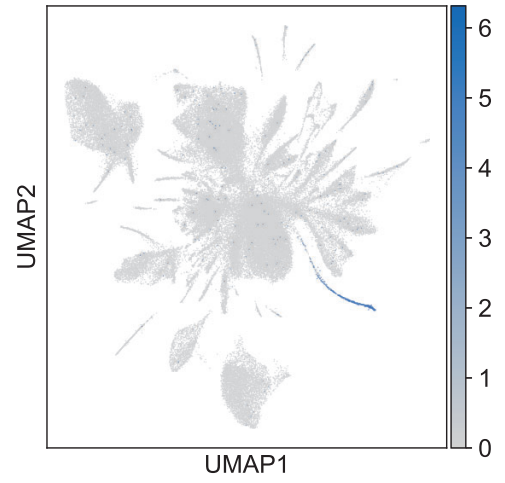

leiden\_1.5 cluster 27

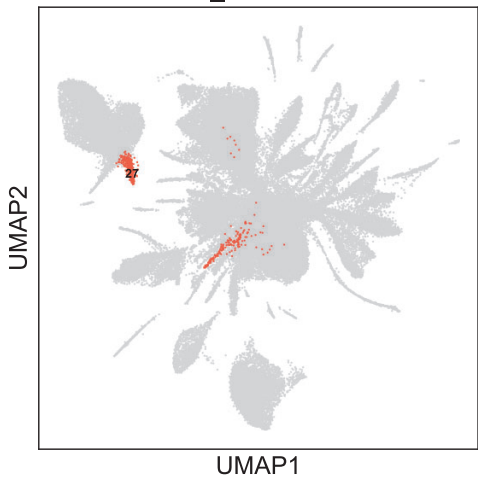

PrileiEVm014528t1

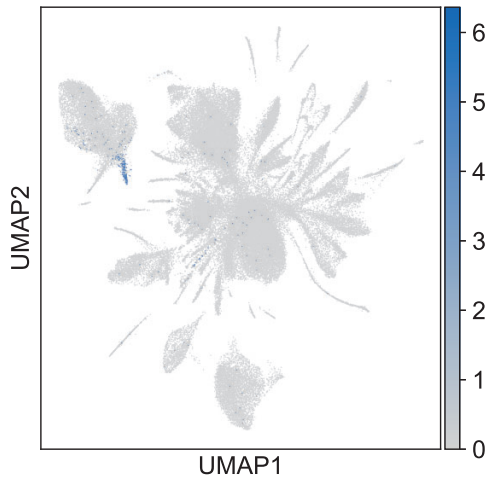

PrileiEVm000298t1

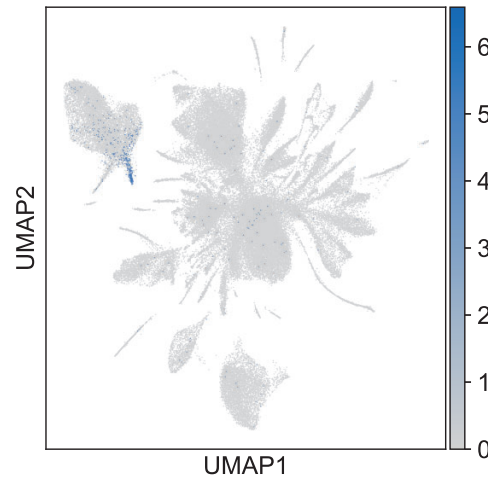

PrileiEVm002744t1

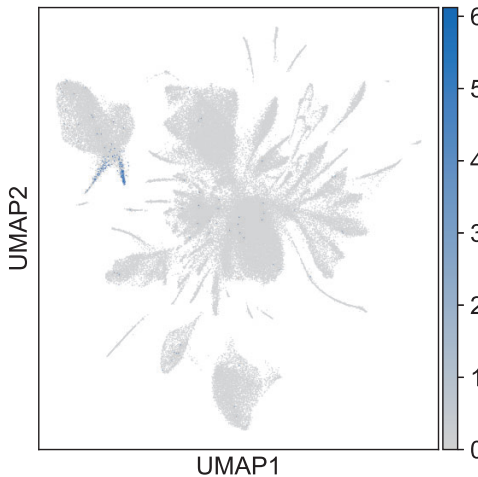

PrileiEVm000432t1

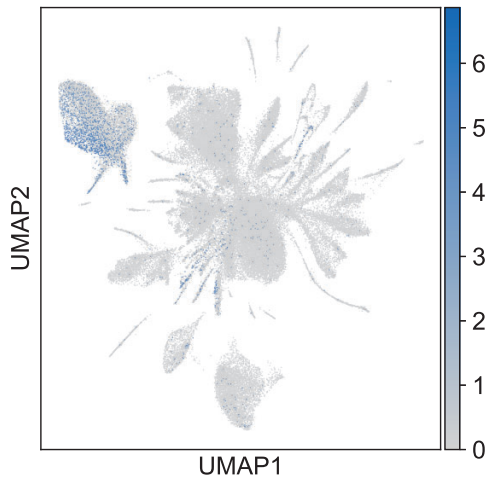

PrileiEVm000661t1

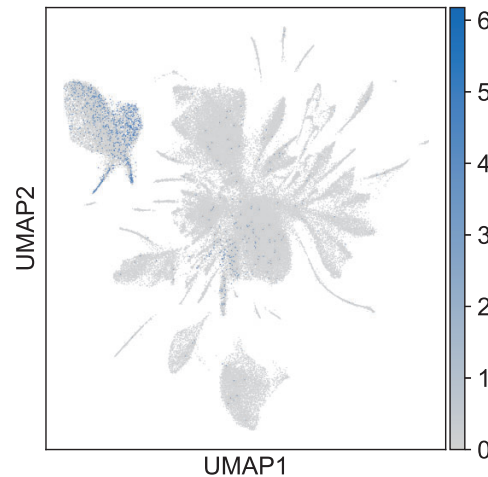

PrileiEVm000237t1

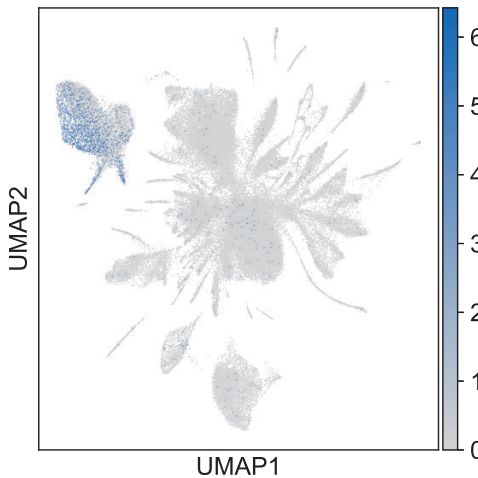

PrileiEVm018859t1

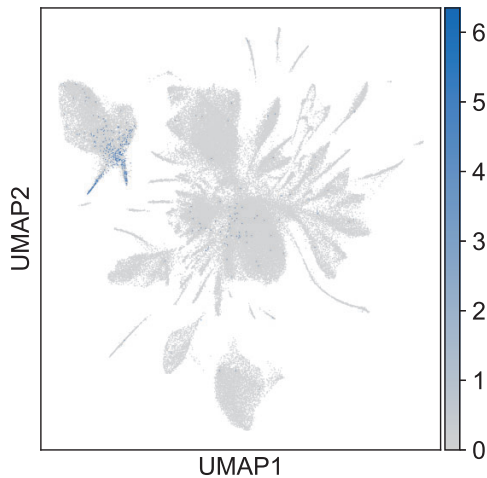

PrileiEVm002502t1

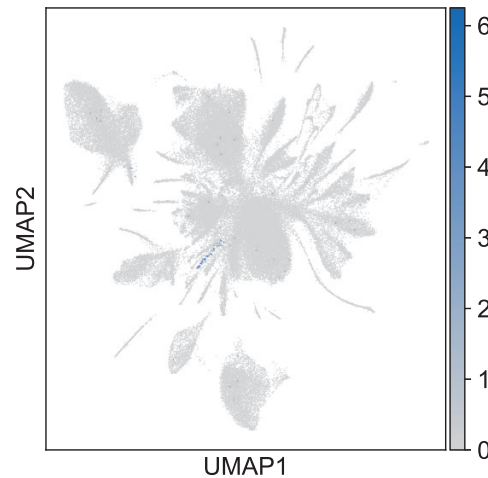

leiden\_1.5 cluster 28

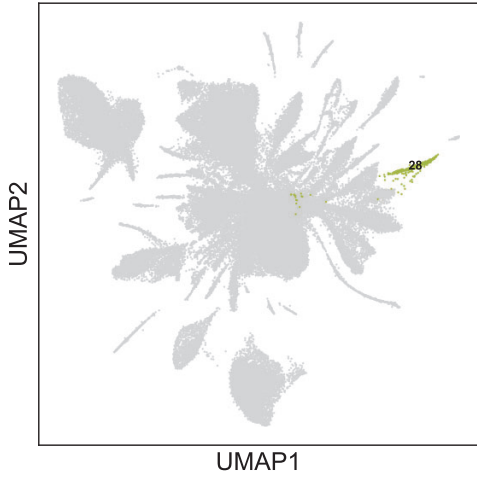

PrileiEVm014681t1

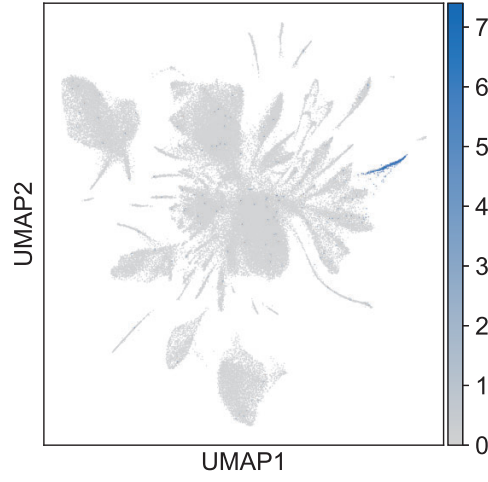

PrileiEVm011523t1

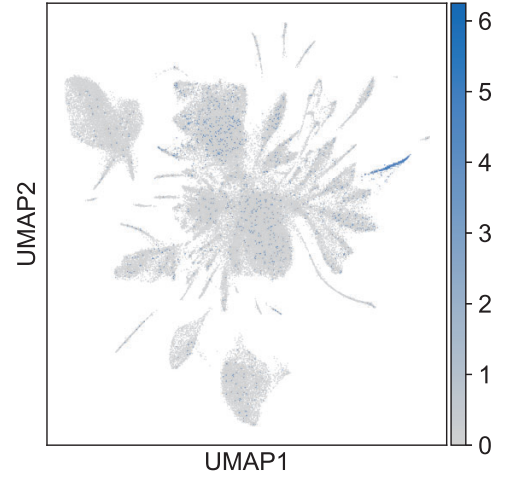

PrileiEVm008813t1

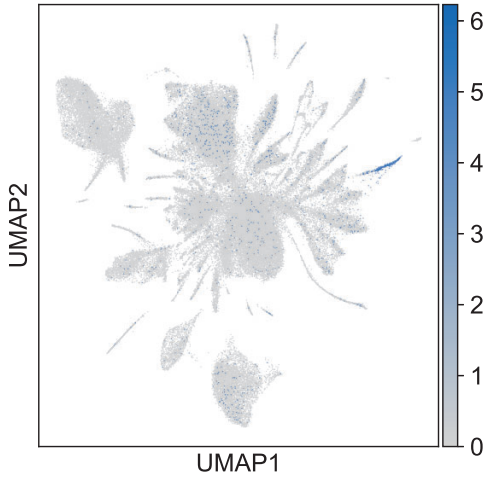

PrileiEVm002679t1

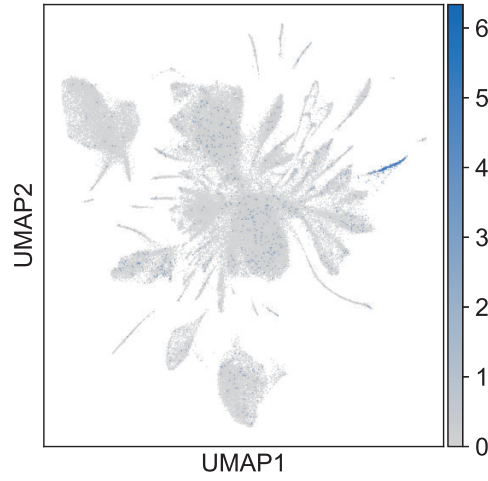

PrileiEVm008195t1

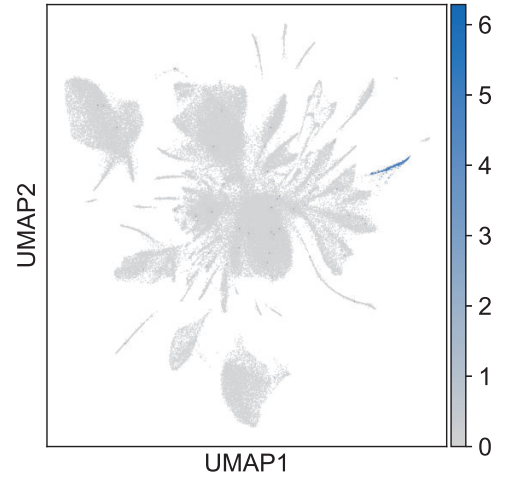

PrileiEVm000322t1

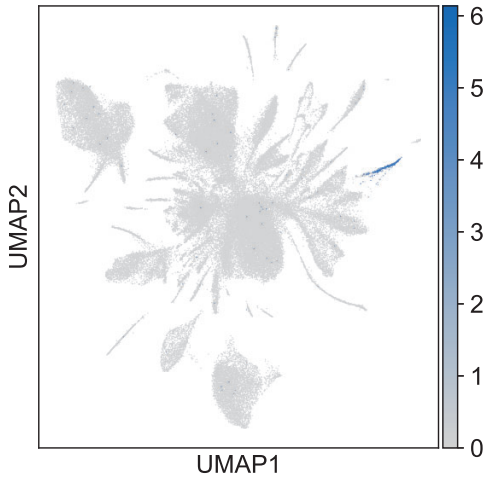

PrileiEVm006293t1

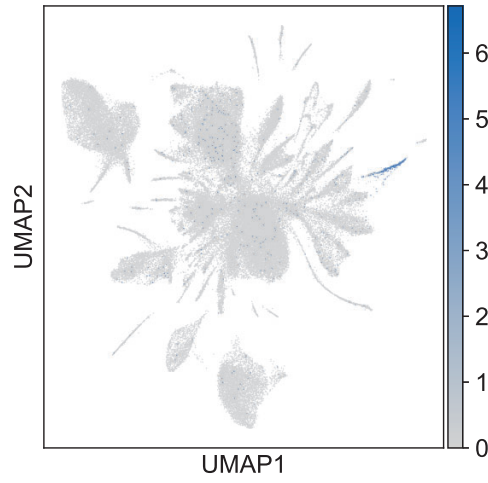

PrileiEVm013699t1

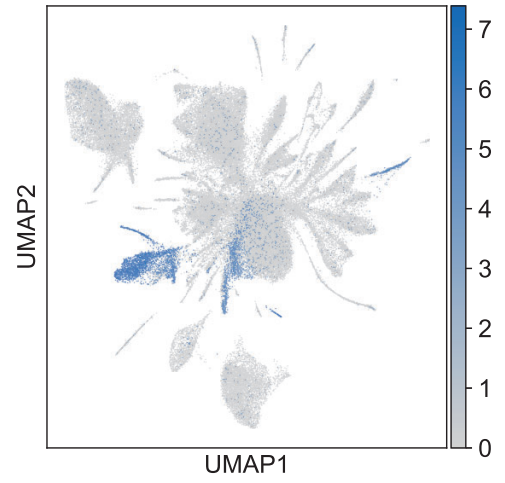



leiden\_1.5 cluster 29

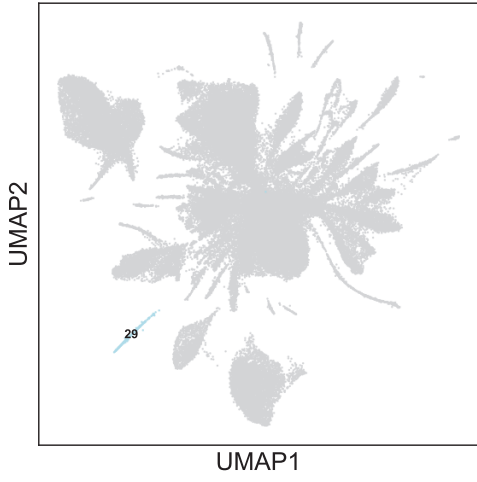

PrileiEVm008904t1

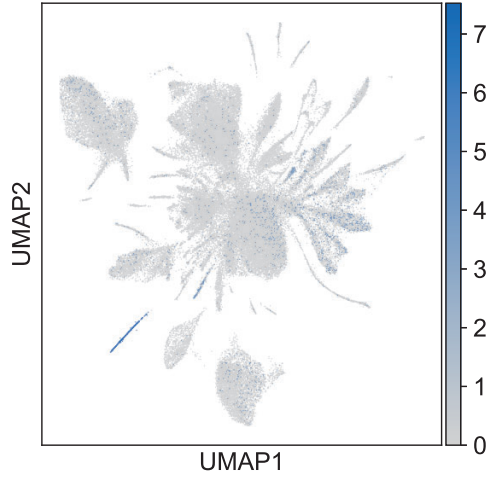

PrileiEVm001525t1

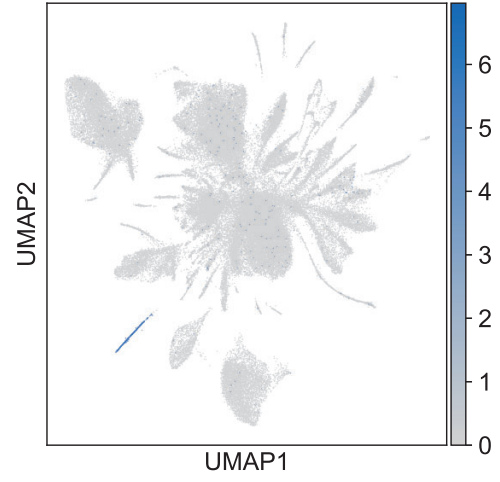

PrileiEVm005995t1

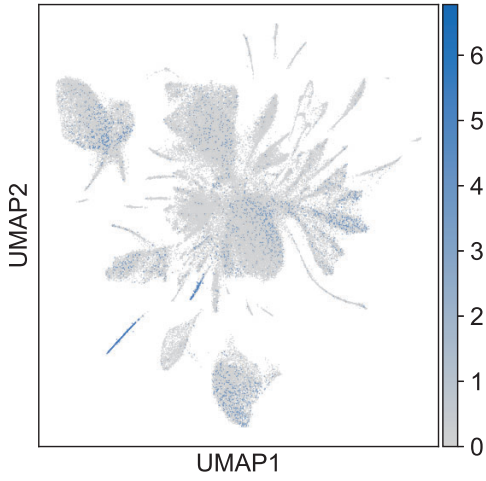

PrileiEVm009818t1

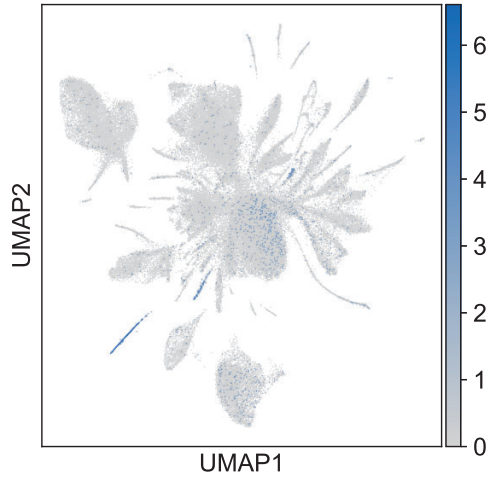

PrileiEVm018192t1

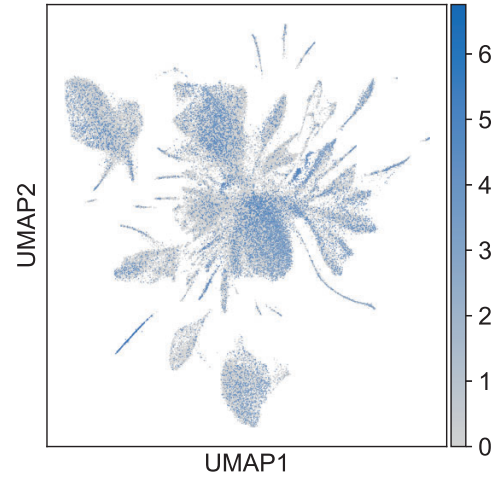

PrileiEVm007184t1

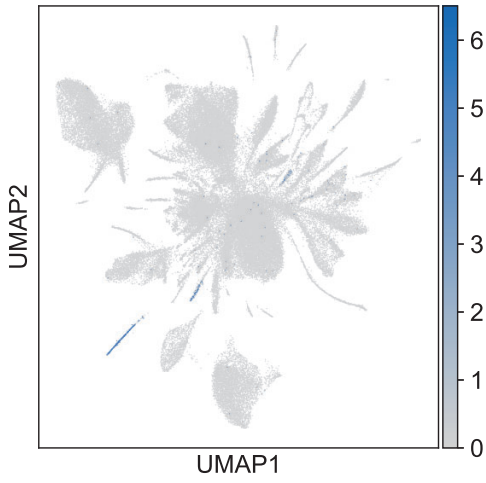

PrileiEVm013994t1

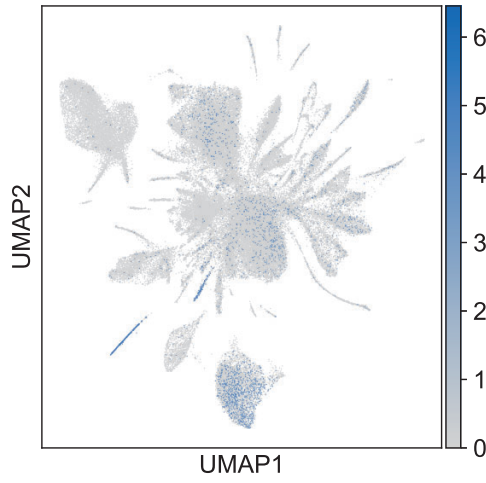

PrileiEVm002671t1

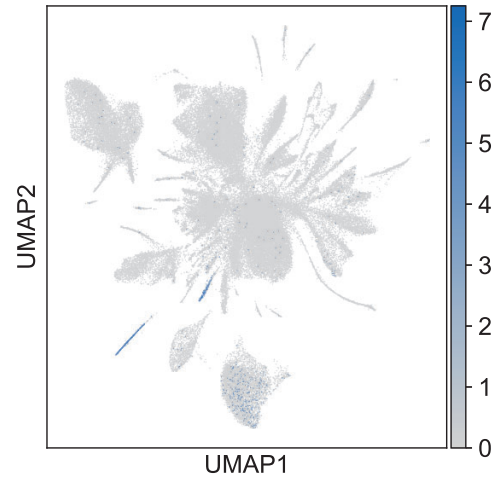

leiden\_1.5 cluster 30

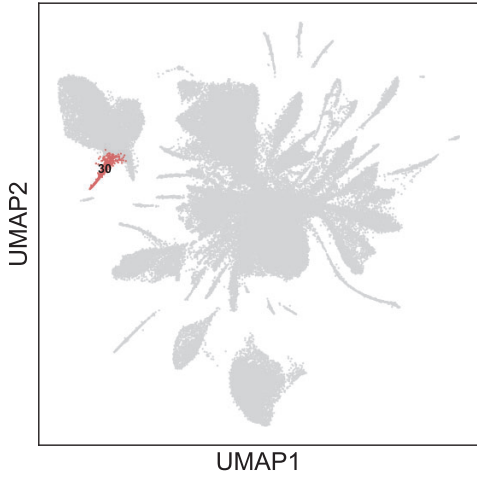

PrileiEVm011741t1

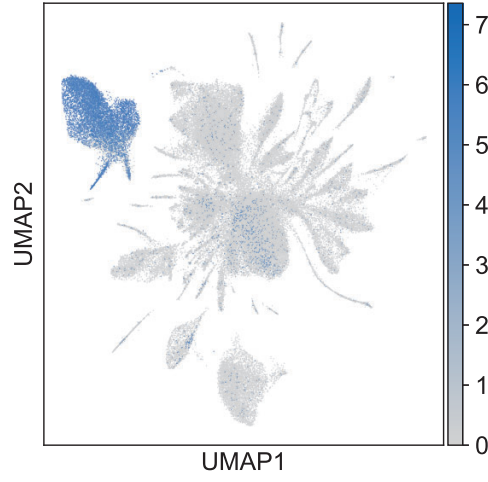

PrileiEVm000290t1

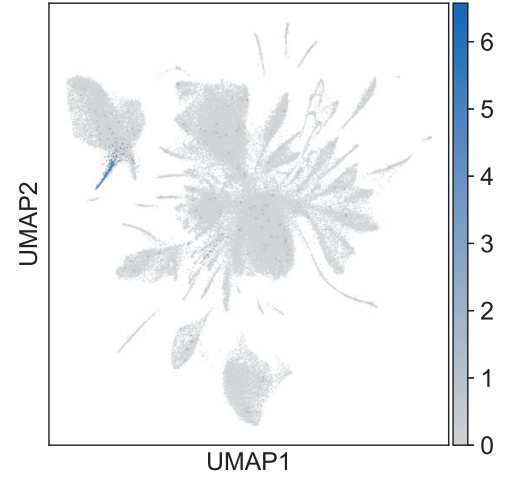

PrileiEVm012191t1

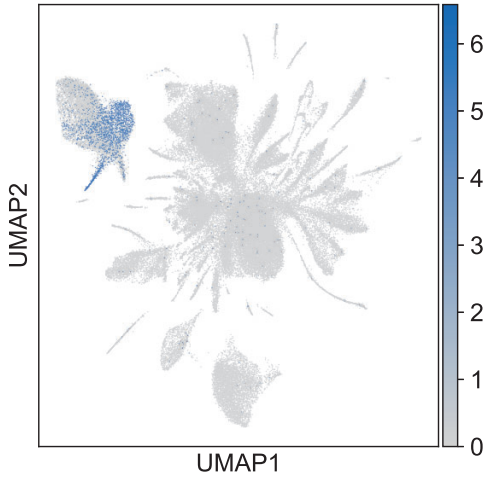

PrileiEVm018738t1

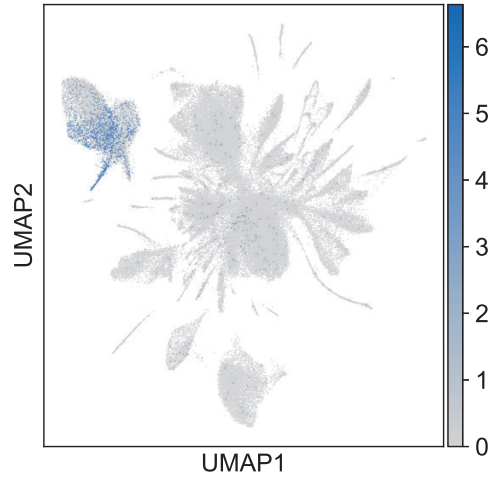

PrileiEVm015909t1

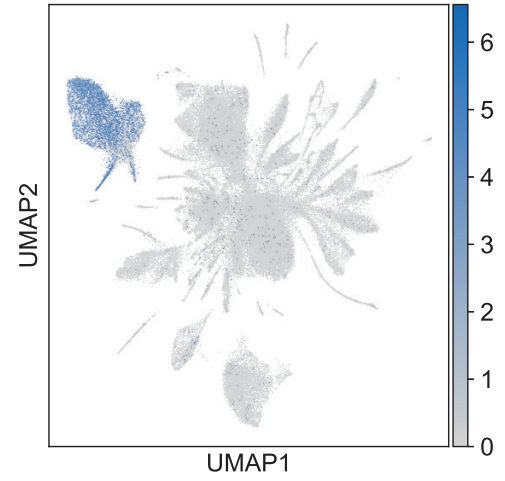

PrileiEVm000299t1

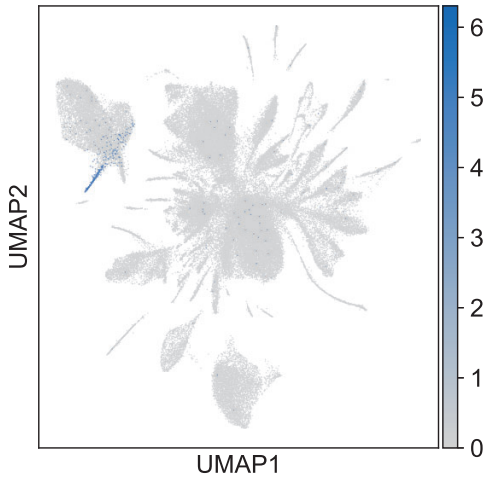

PrileiEVm017880t1

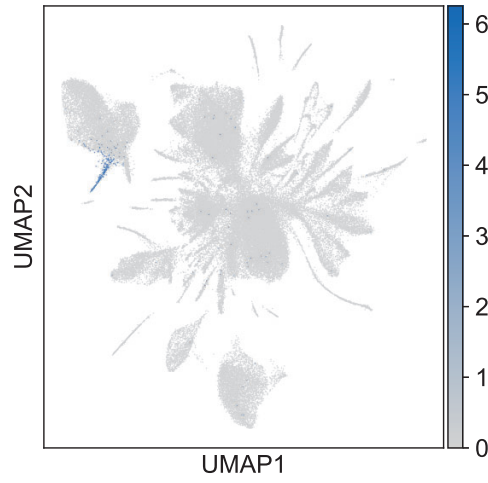

PrileiEVm014619t1

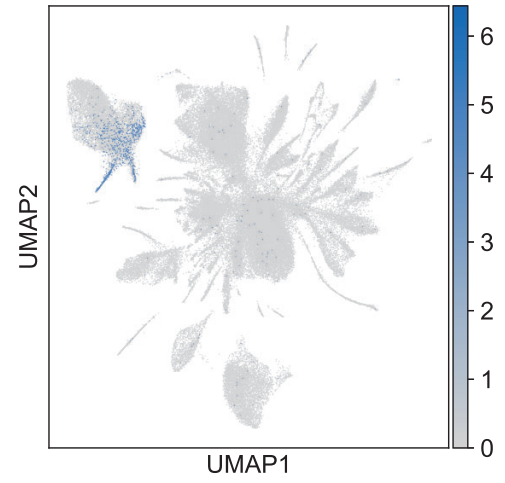

leiden\_1.5 cluster 31

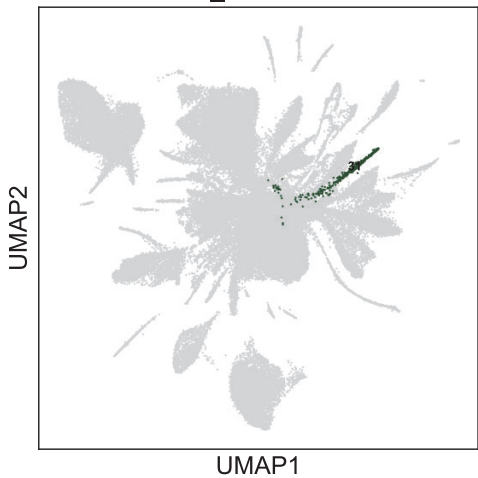

PrileiEVm026965t1

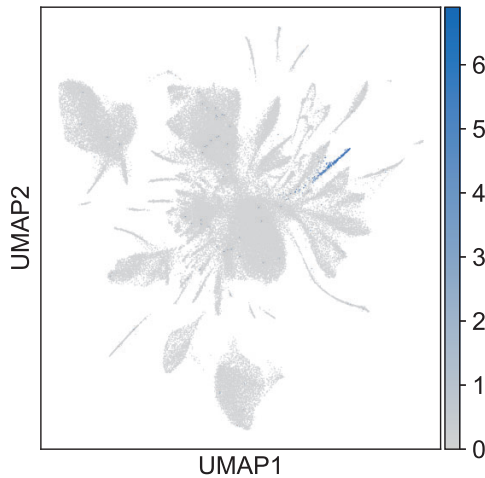

PrileiEVm007051t1

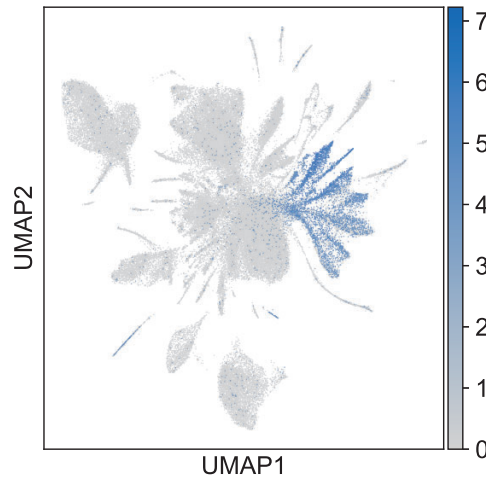

PrileiEVm019930t1

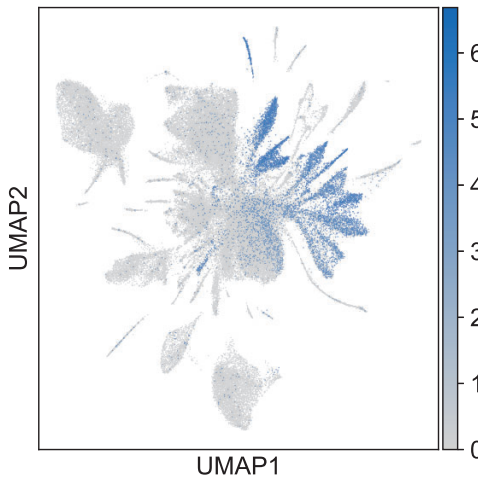

PrileiEVm010637t1

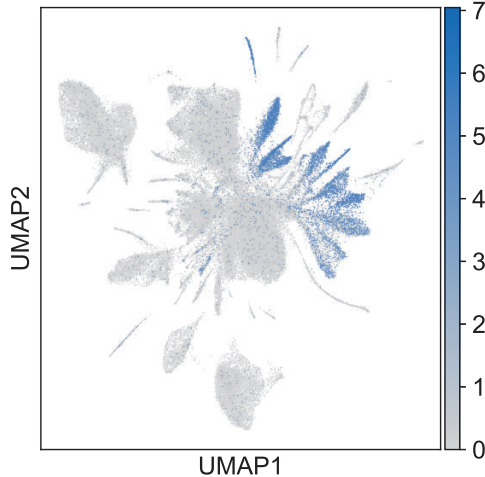

PrileiEVm021649t1

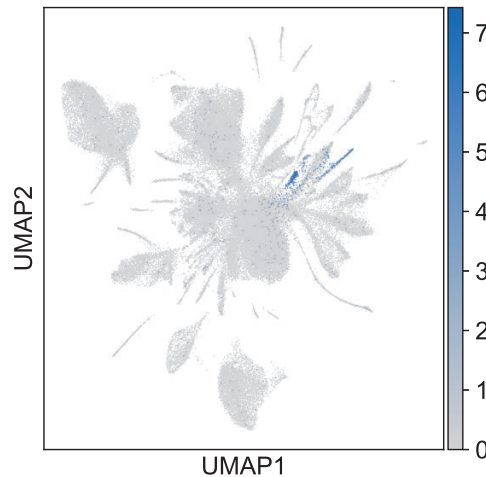

PrileiEVm011808t1

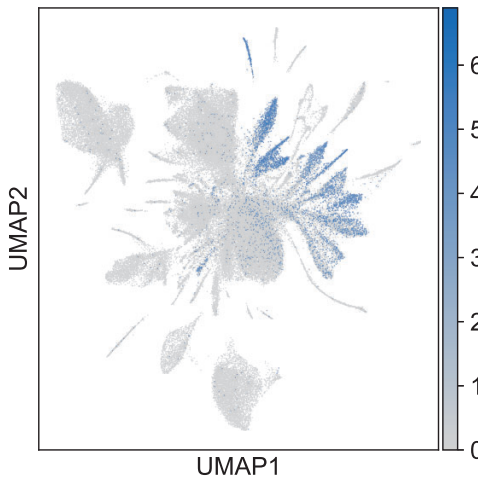

PrileiEVm020317t1

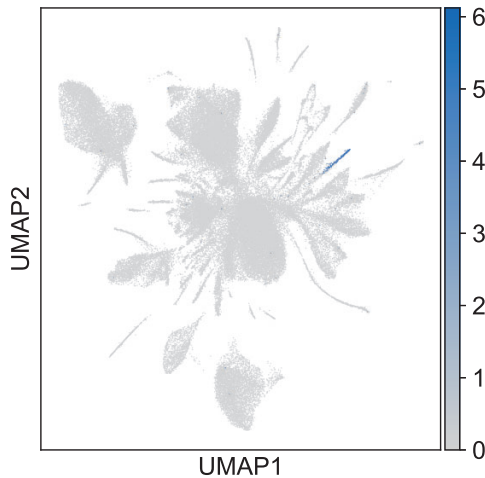

PrileiEVm021650t1

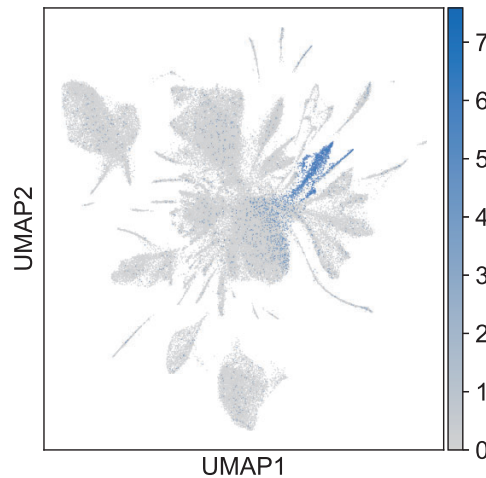



leiden\_1.5 cluster 32

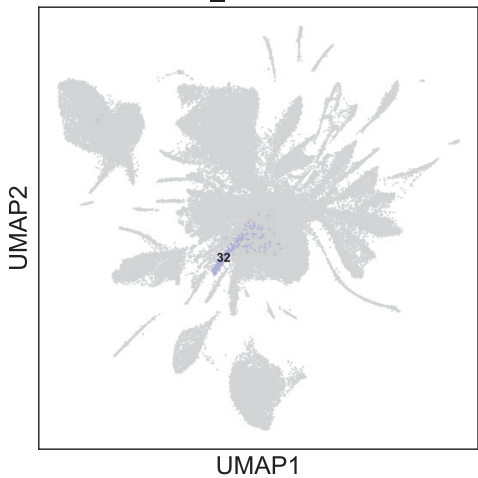

PrileiEVm031378t1

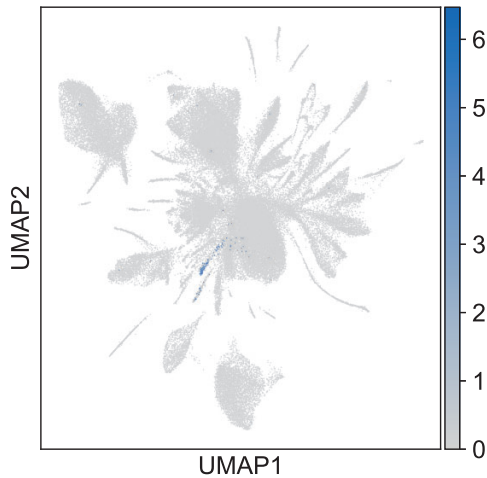

PrileiEVm001370t1

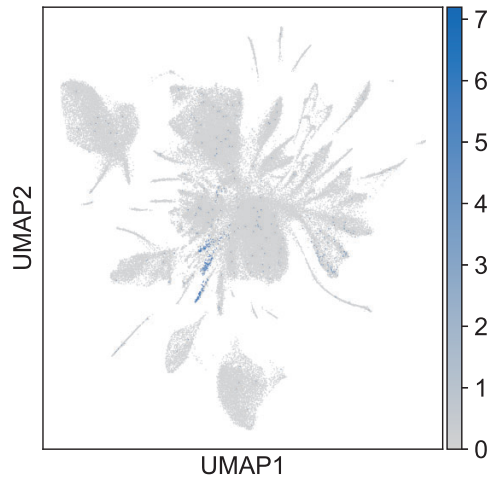

PrileiEVm014873t1

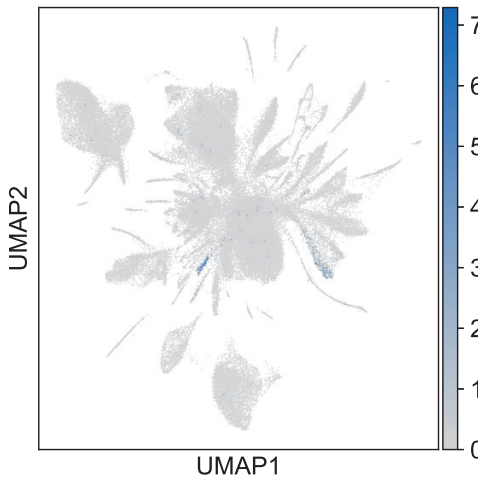

PrileiEVm031285t1

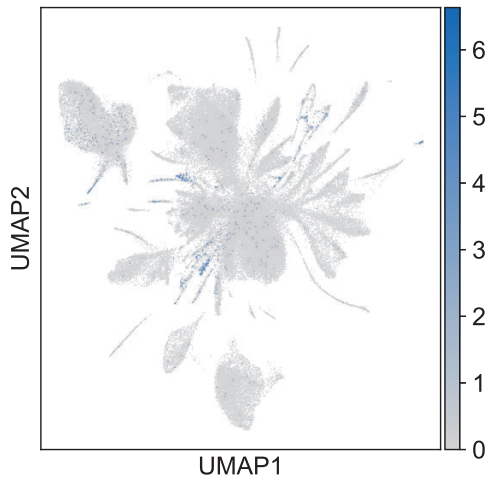

PrileiEVm004721t1

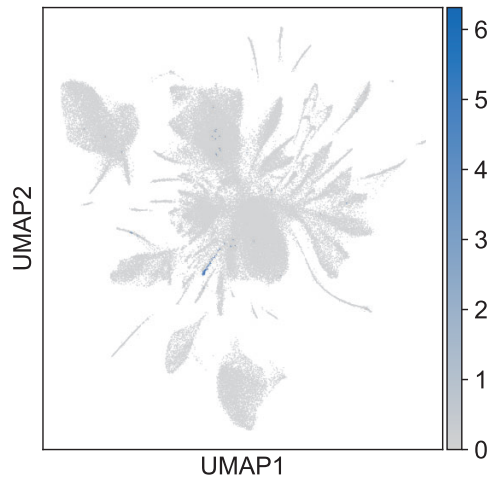

PrileiEVm000915t1

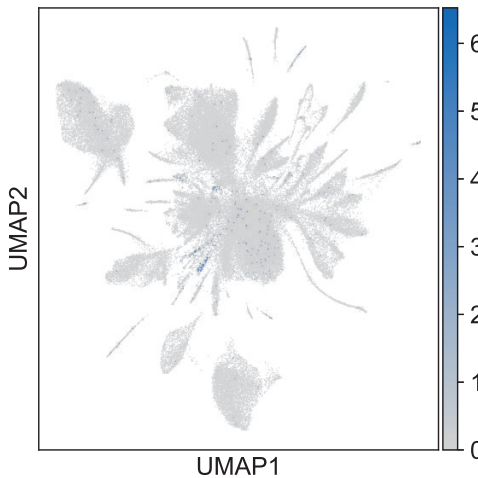

PrileiEVm000208t1

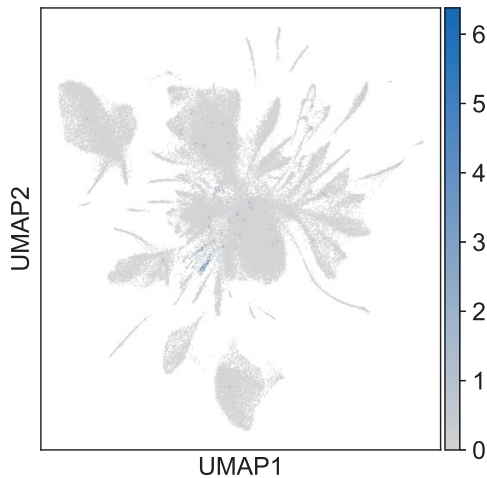

PrileiEVm015527t1

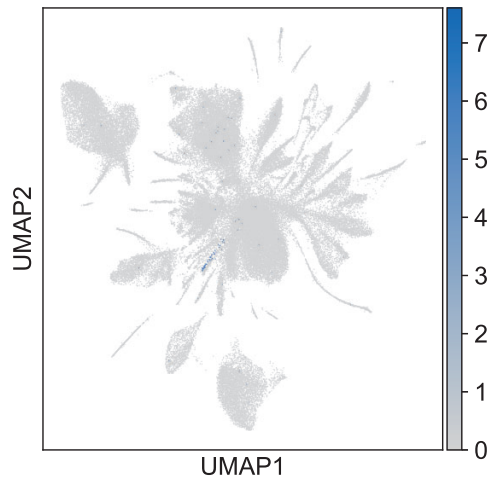

leiden\_1.5 cluster 33

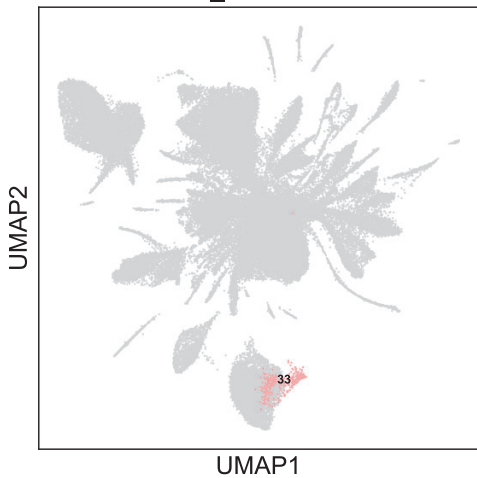

PrileiEVm015446t1

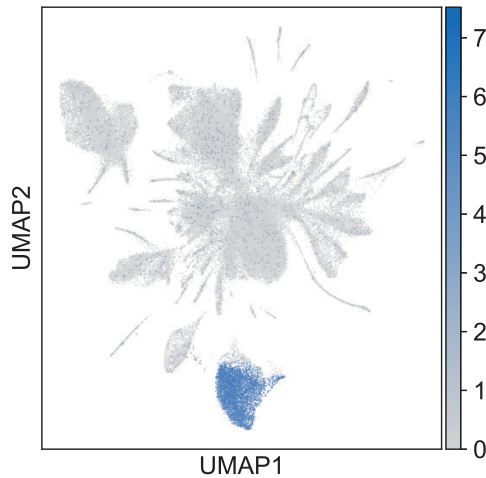

PrileiEVm028005t1

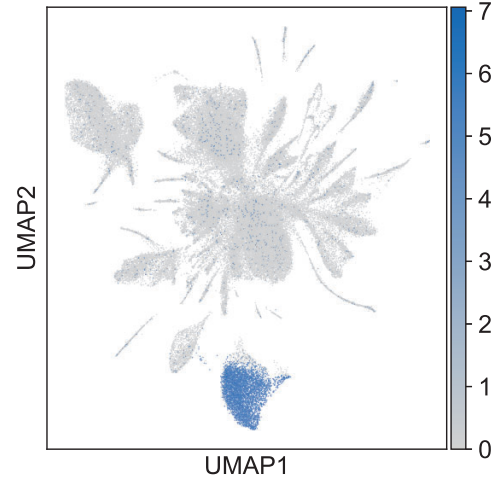

PrileiEVm016808t1

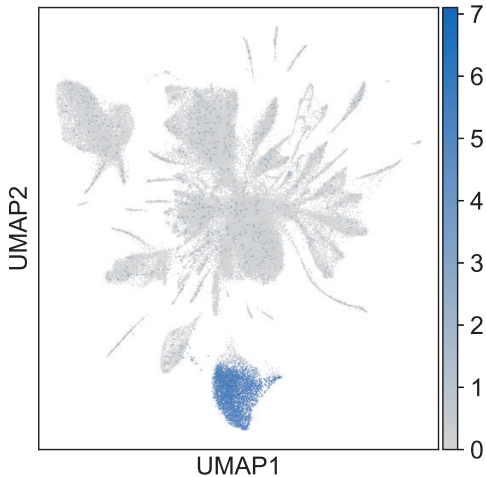

PrileiEVm020599t1

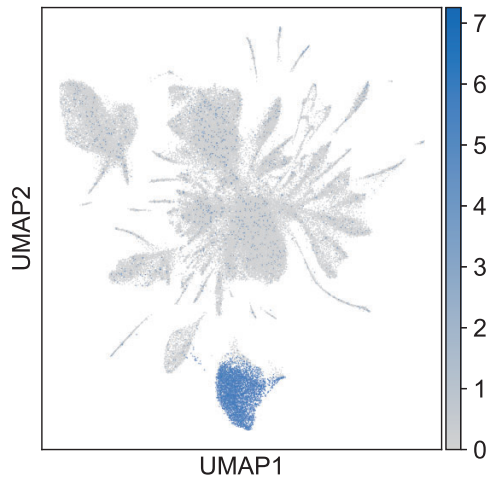

PrileiEVm020147t1

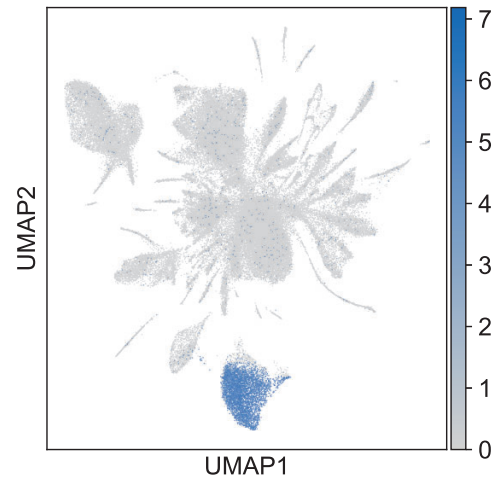

PrileiEVm016664t1

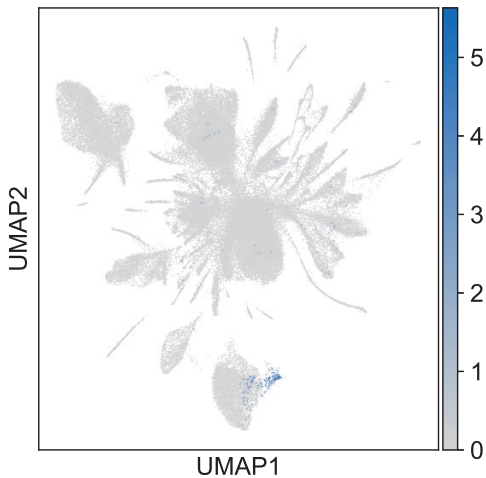

PrileiEVm017615t1

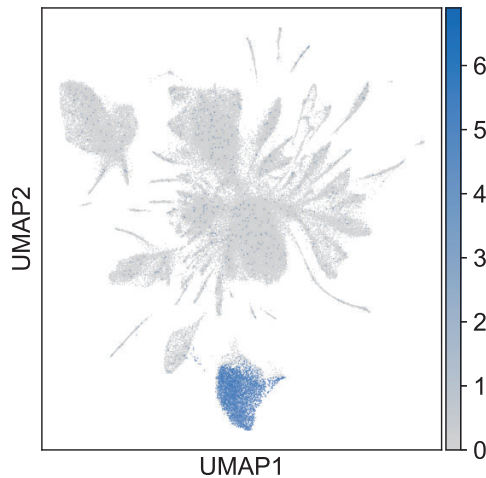

PrileiEVm012805t1

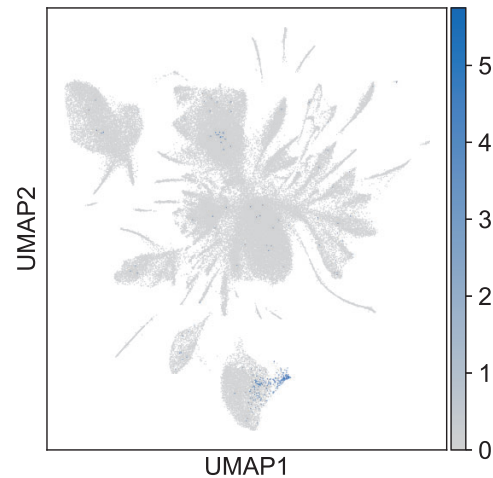

leiden\_1.5 cluster 34

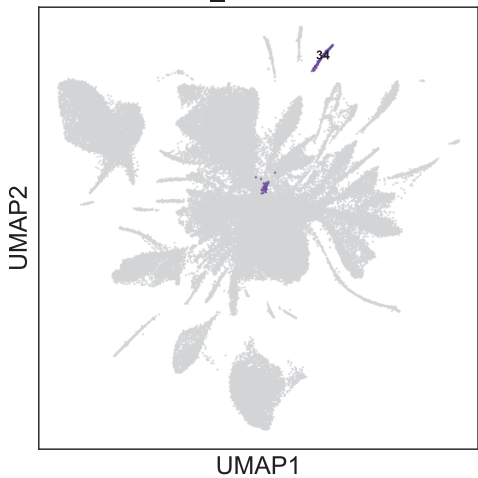

PrileiEVm032091t1

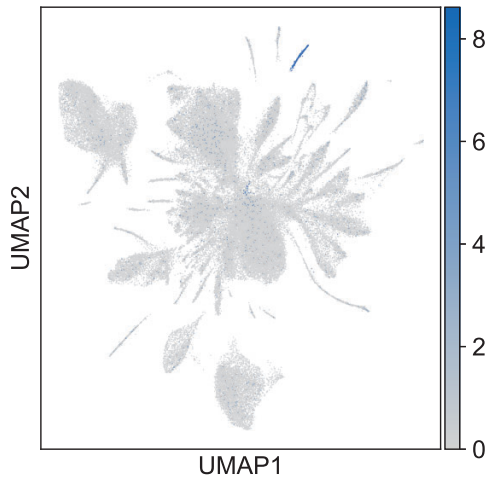

PrileiEVm015734t1

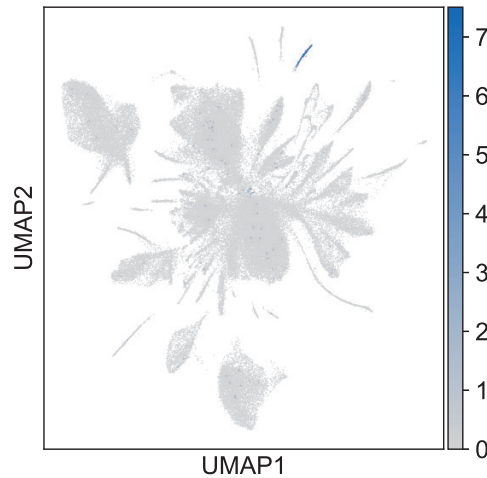

PrileiEVm003483t1

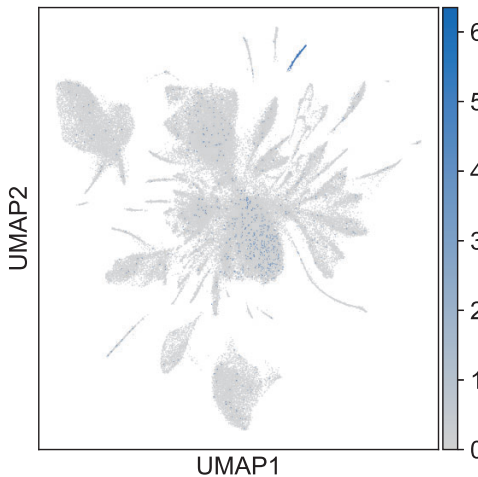

PrileiEVm010163t1

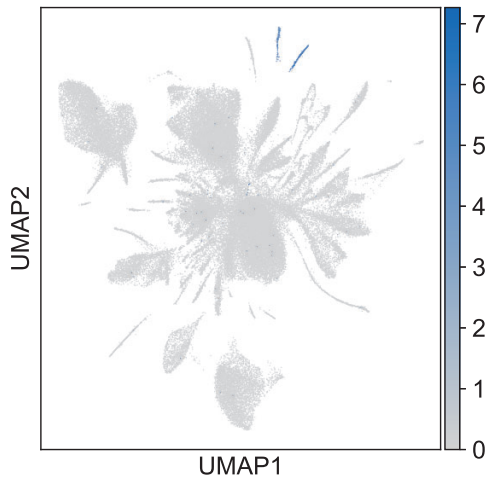

PrileiEVm007264t1

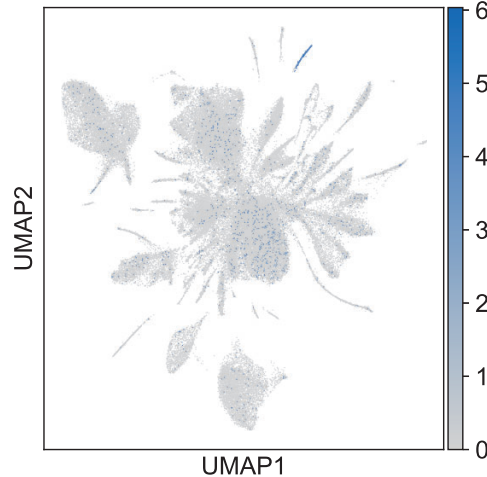

PrileiEVm031901t1

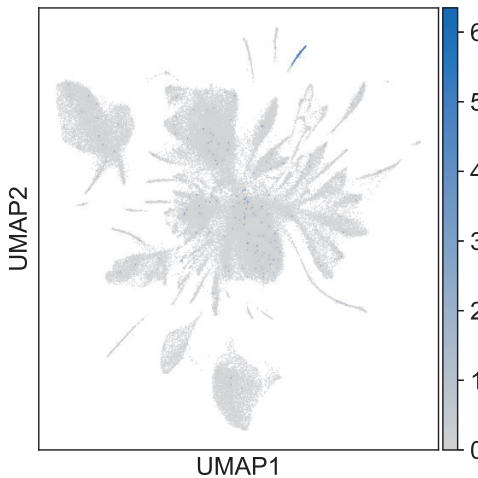

PrileiEVm000875t1

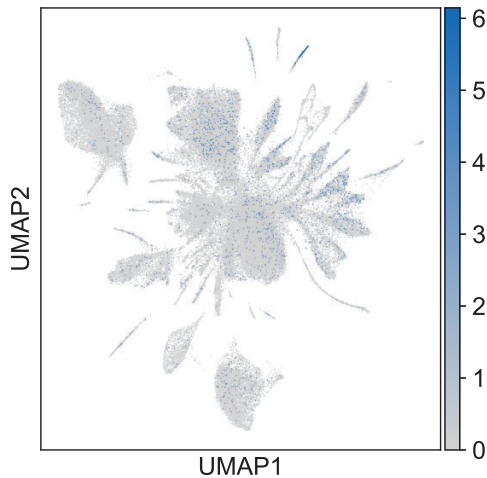

PrileiEVm018841t1

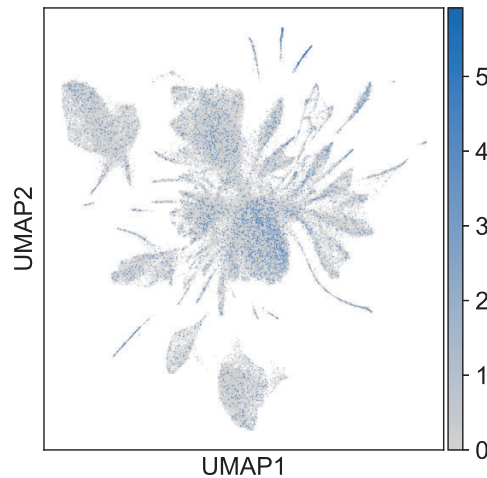



leiden\_1.5 cluster 35

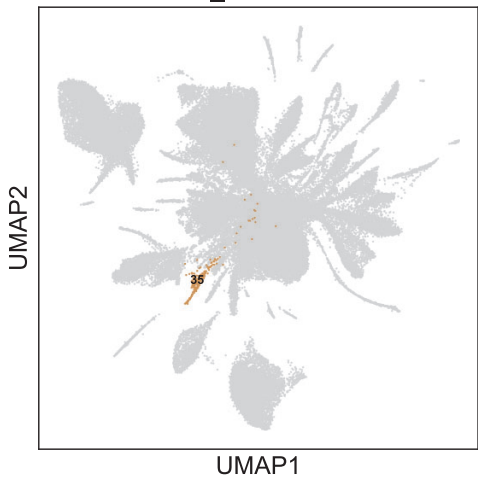

PrileiEVm014251t1

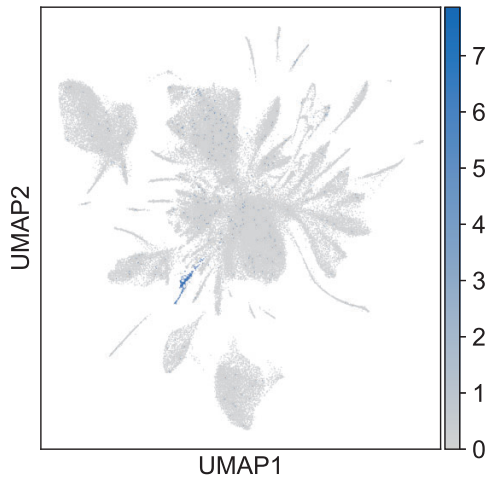

PrileiEVm003779t1

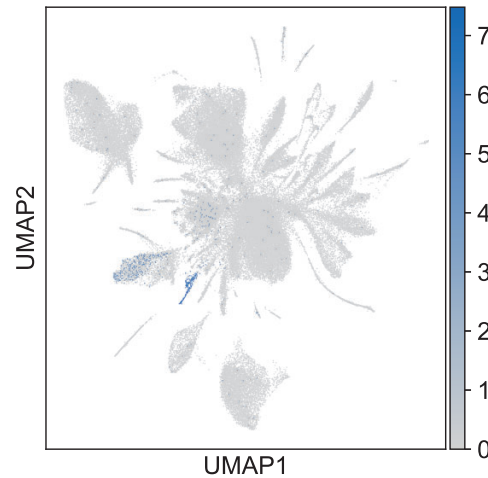

PrileiEVm026444t1

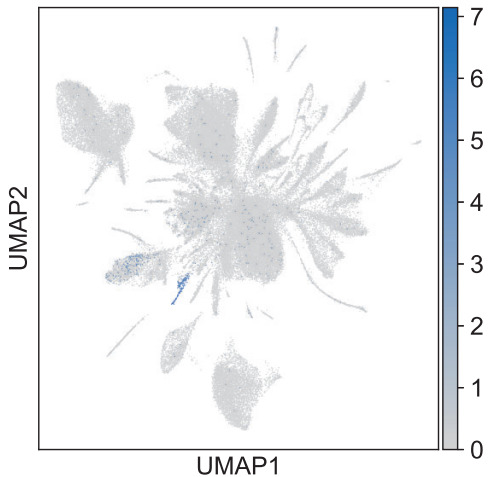

PrileiEVm017930t1

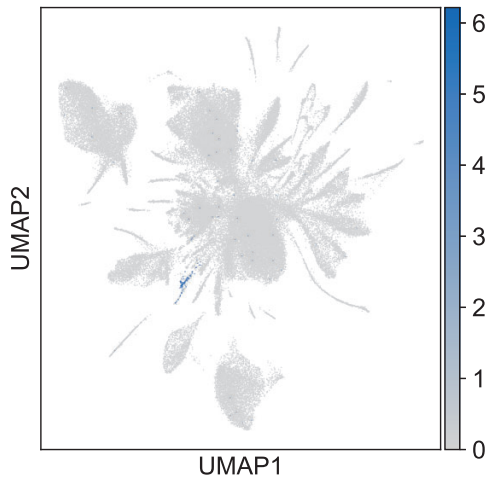

PrileiEVm024329t1

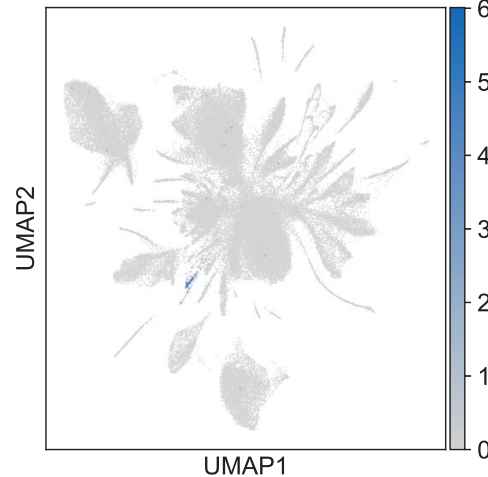

PrileiEVm001437t1

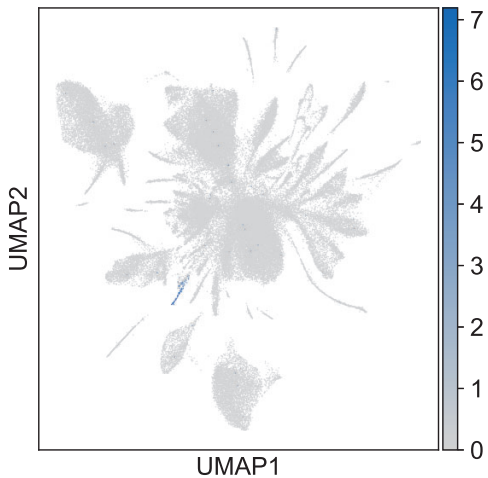

PrileiEVm003470t1

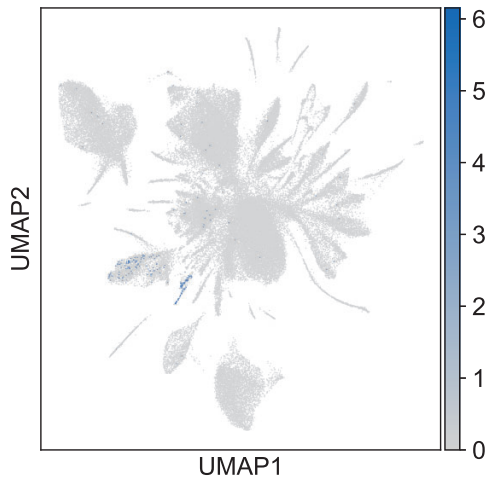

PrileiEVm005376t1

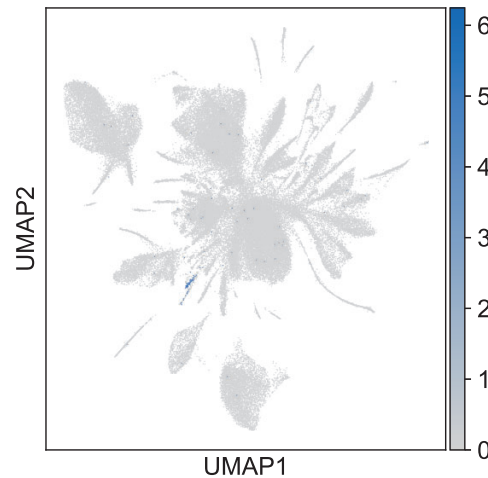

leiden\_1.5 cluster 36

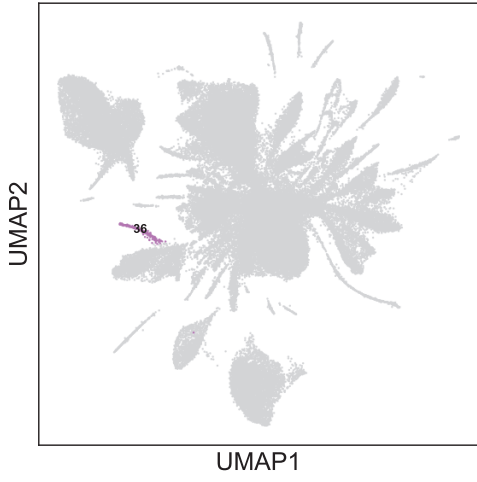

PrileiEVm013699t1

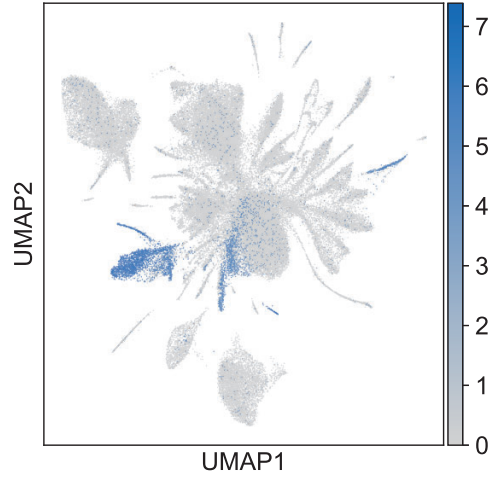

PrileiEVm013301t1

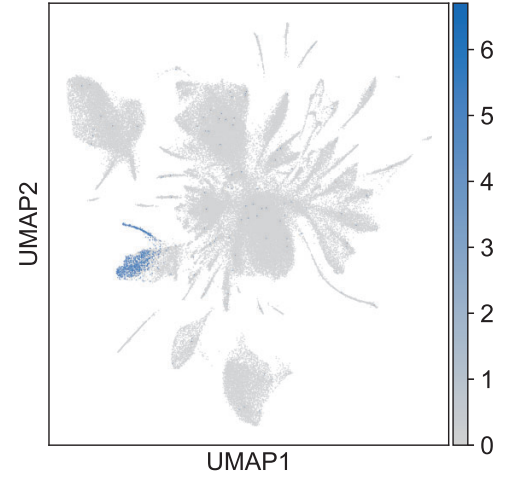

PrileiEVm000584t1

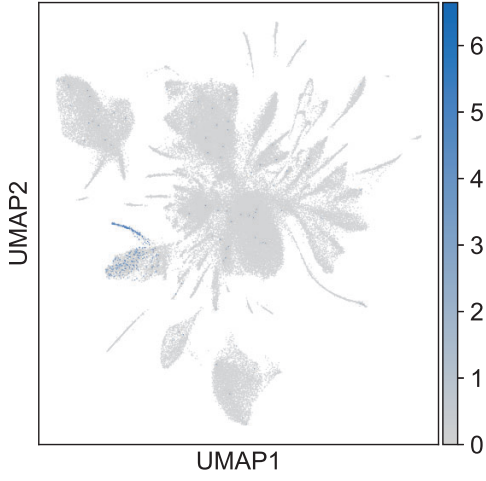

PrileiEVm009407t1

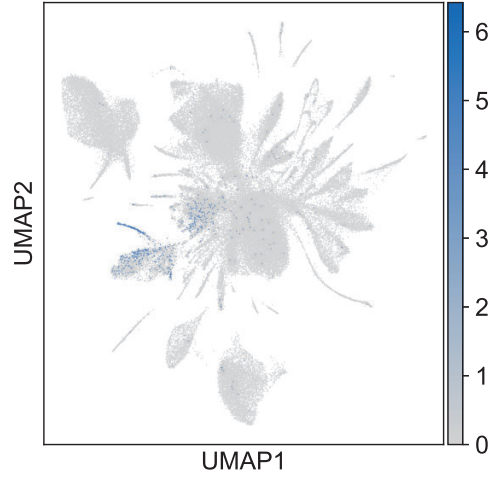

PrileiEVm000002t1

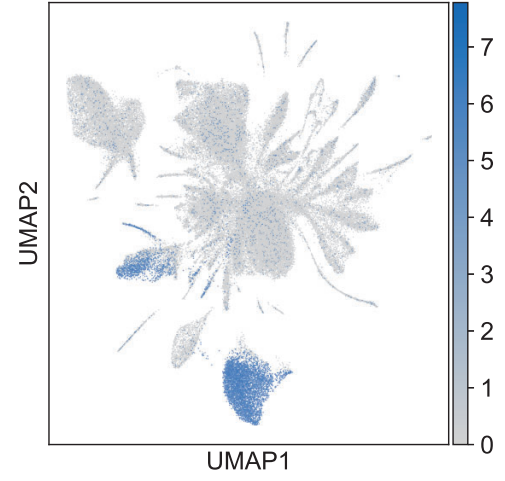

PrileiEVm016762t1

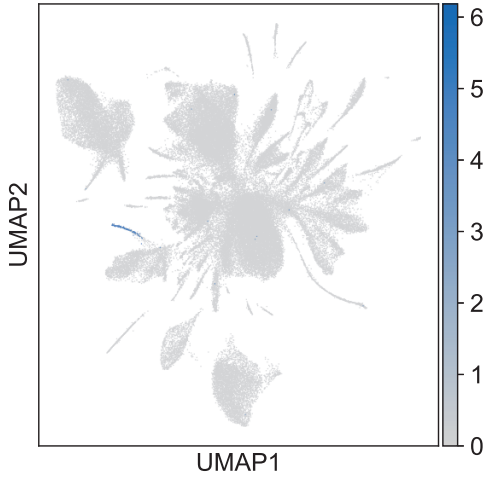

PrileiEVm005681t1

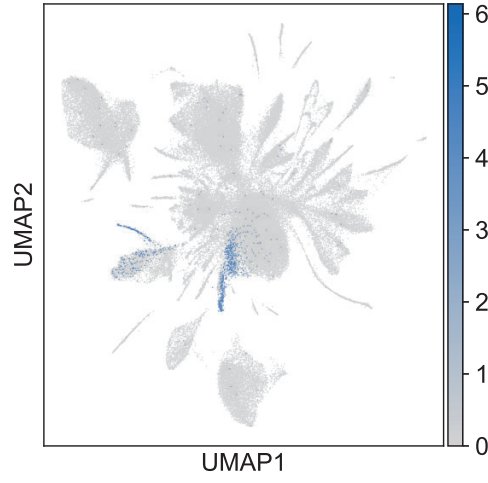

PrileiEVm003849t1

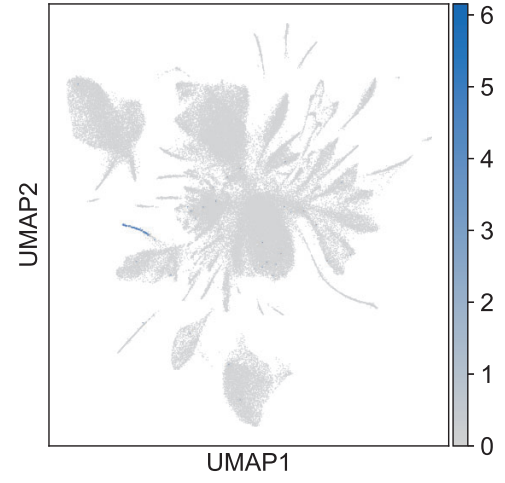

leiden\_1.5 cluster 37

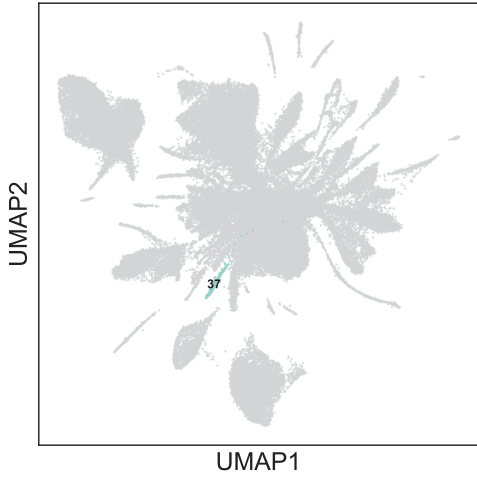

PrileiEVm002621t1

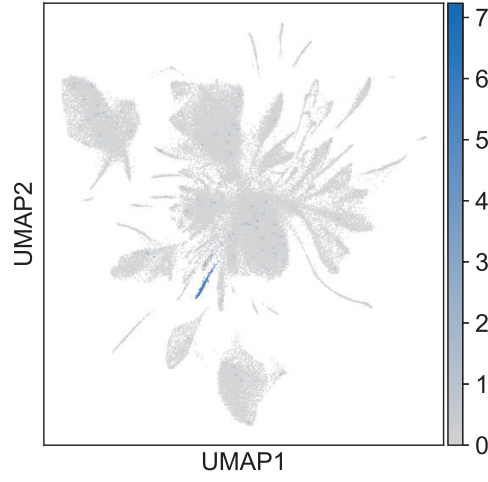

PrileiEVm015483t1

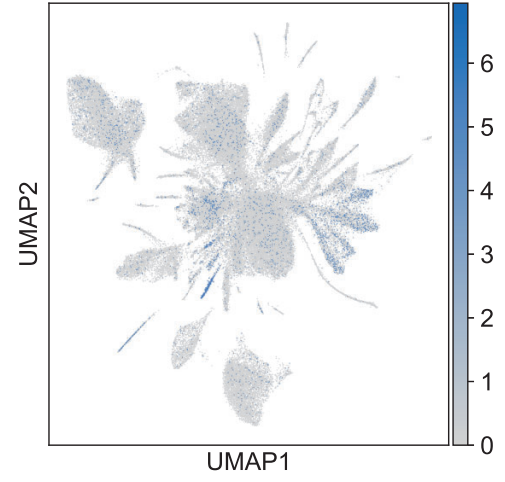

PrileiEVm028604t1

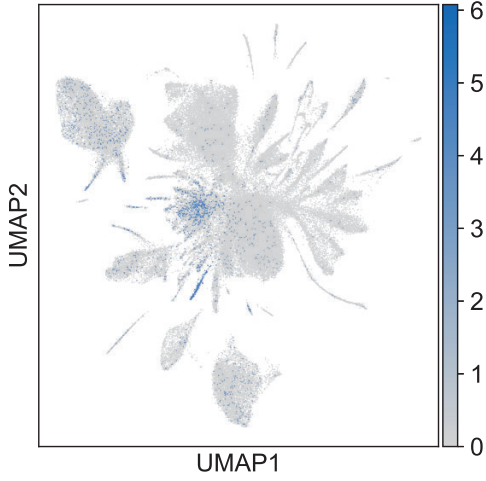

PrileiEVm005995t1

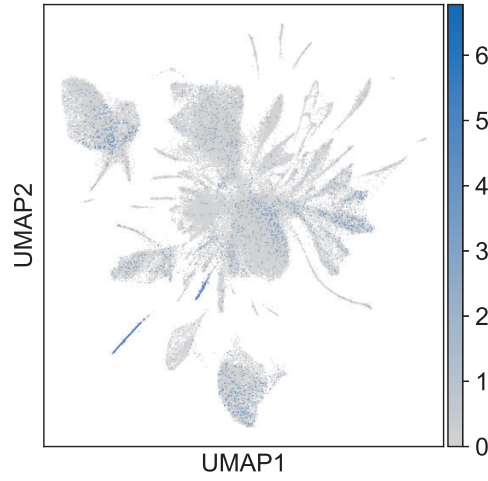

PrileiEVm002671t1

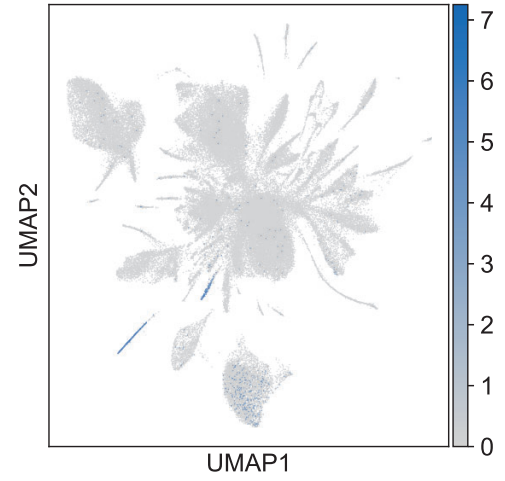

PrileiEVm013994t1

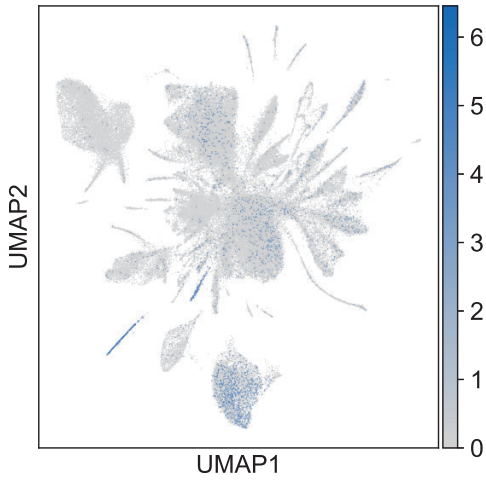

PrileiEVm002663t1

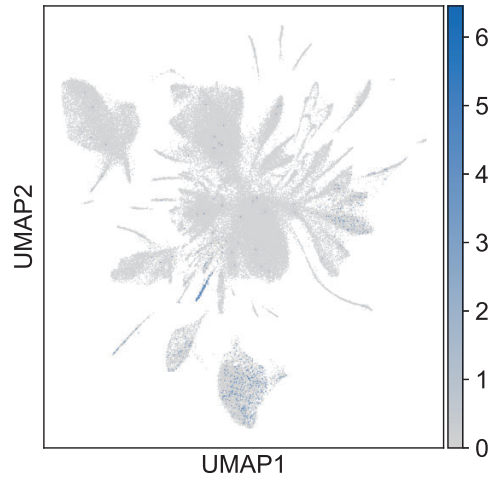

PrileiEVm031996t1

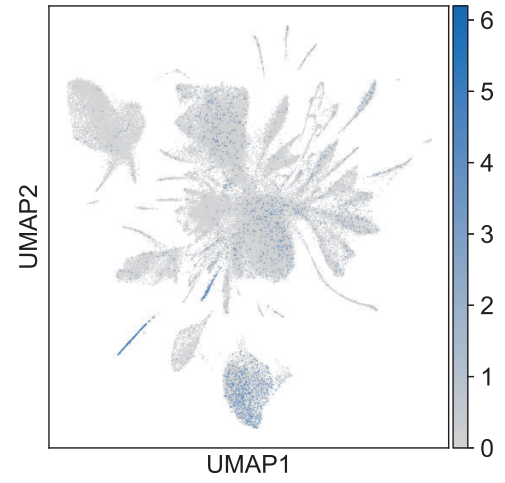



leiden\_1.5 cluster 38

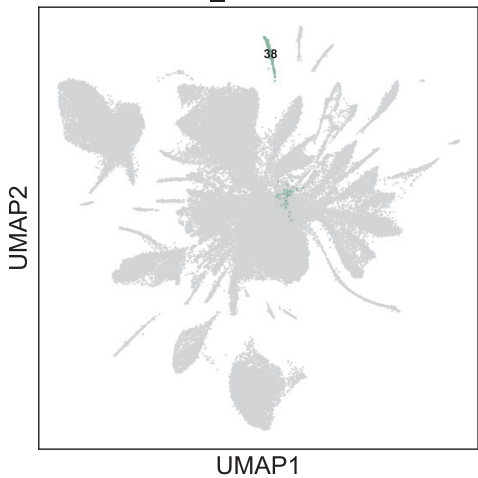

PrileiEVm010637t1

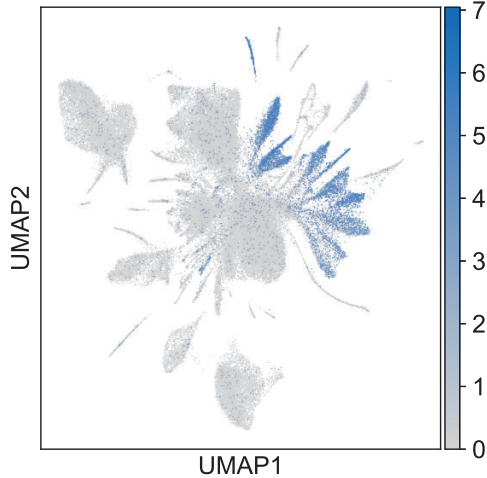

PrileiEVm022485t1

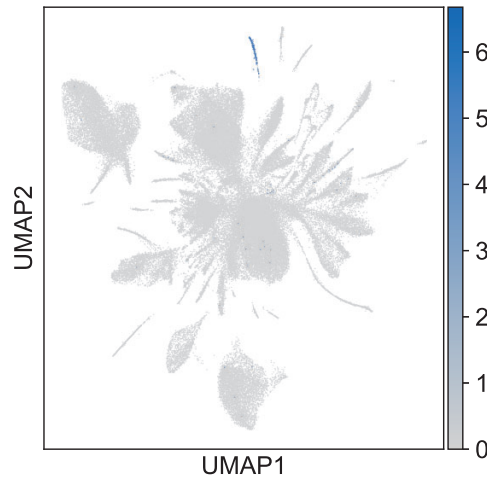

PrileiEVm019930t1



PrileiEVm022227t1

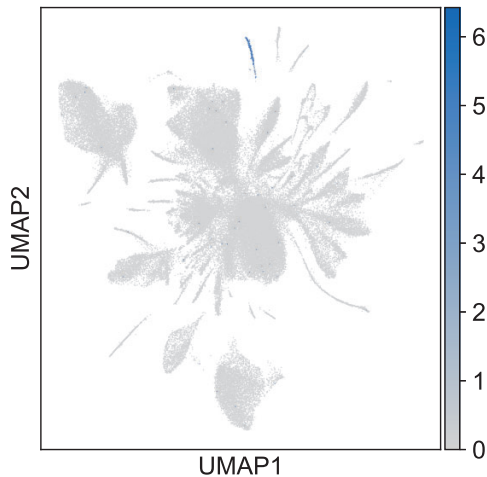

PrileiEVm011808t1

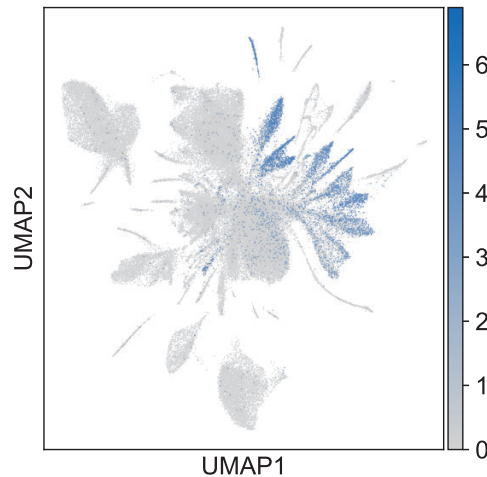

PrileiEVm011828t1

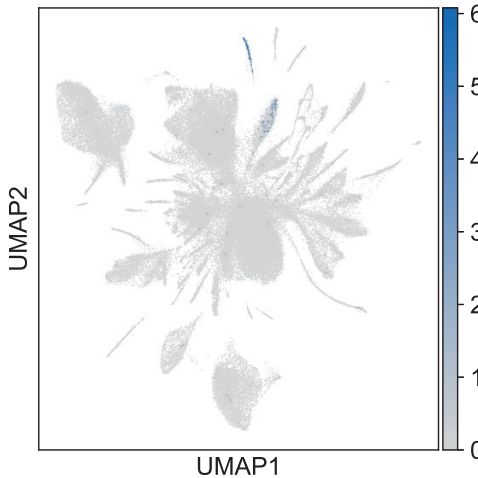

PrileiEVm024759t1

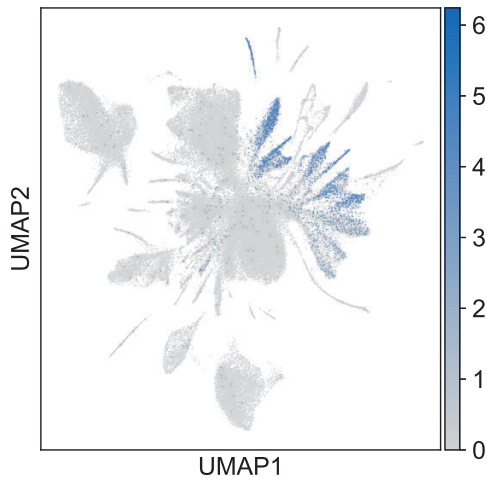

PrileiEVm023483t1

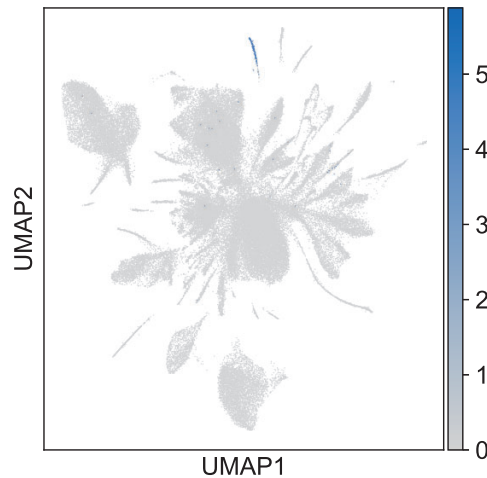

leiden\_1.5 cluster 39

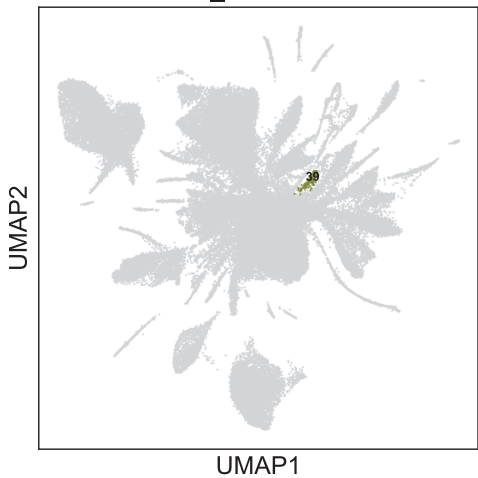

PrileiEVm001132t1

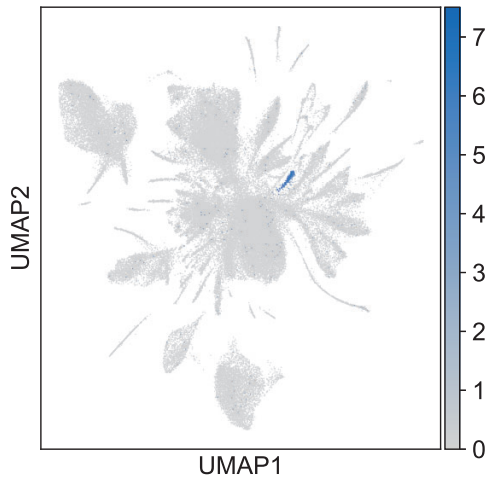

PrileiEVm021649t1

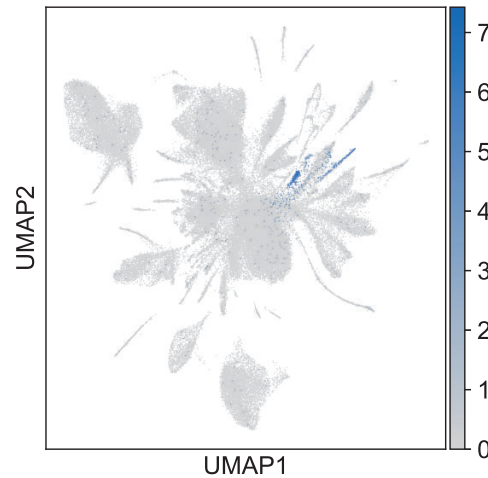

PrileiEVm013722t1



PrileiEVm021112t1

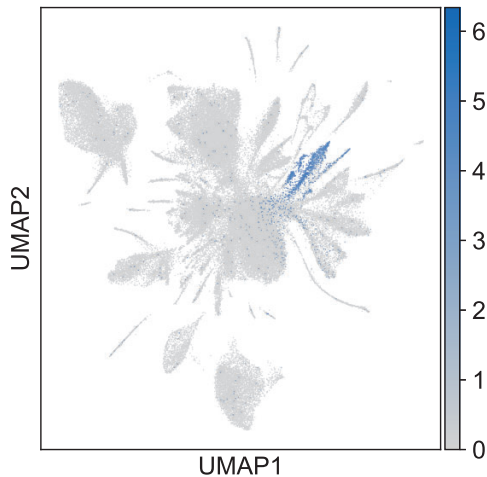

PrileiEVm004407t1

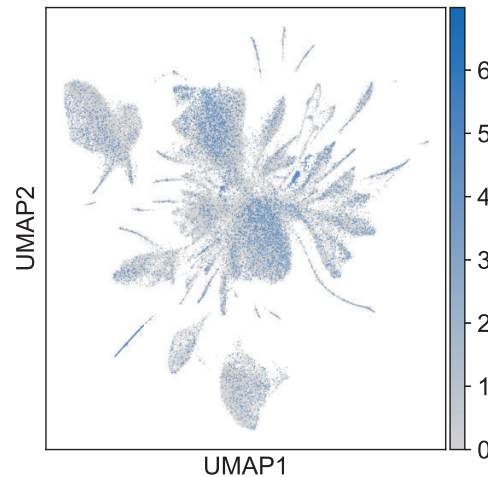

PrileiEVm021316t1

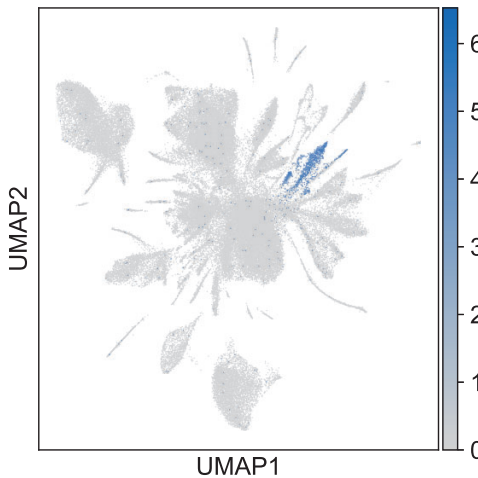

PrileiEVm021826t1

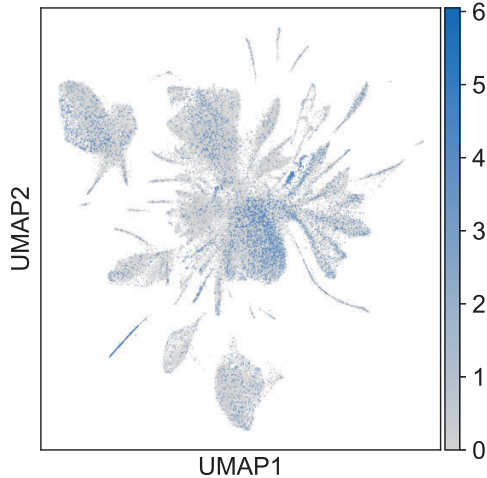

PrileiEVm019805t1

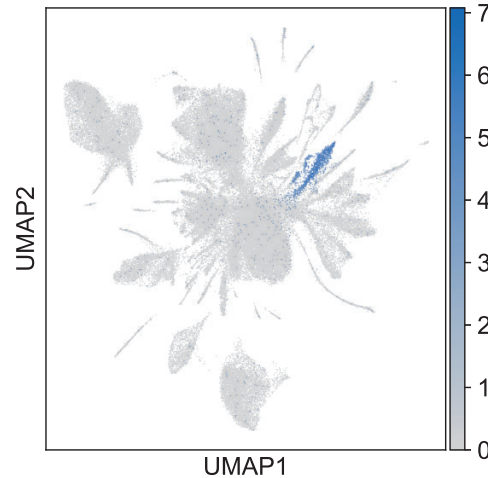

leiden\_1.5 cluster 40

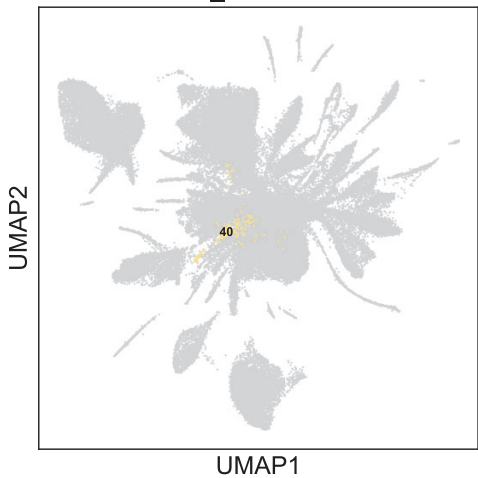

PrileiEVm008010t1

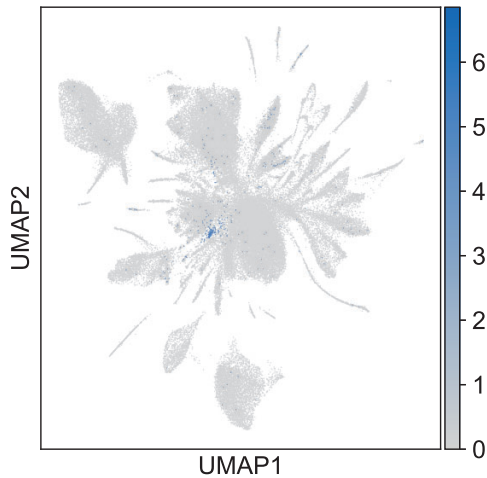

PrileiEVm000778t1

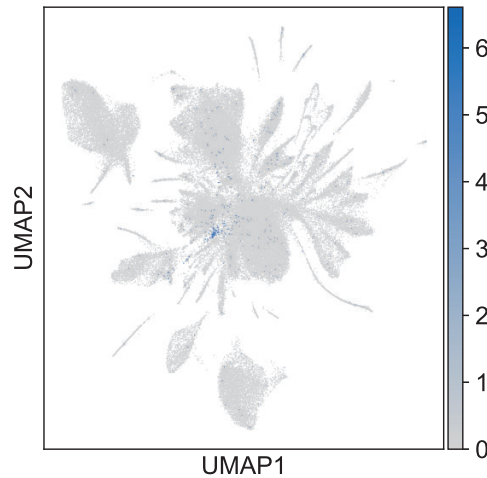

PrileiEVm020404t1

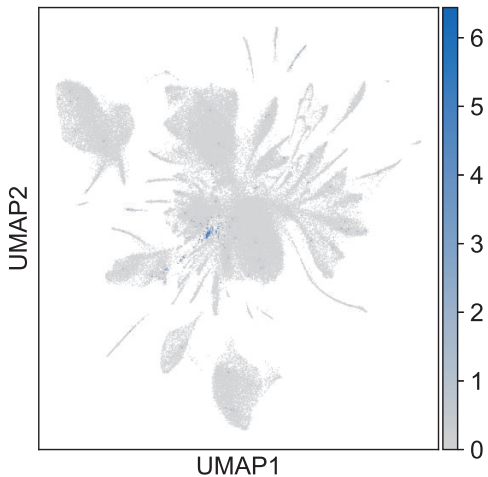

PrileiEVm021663t1

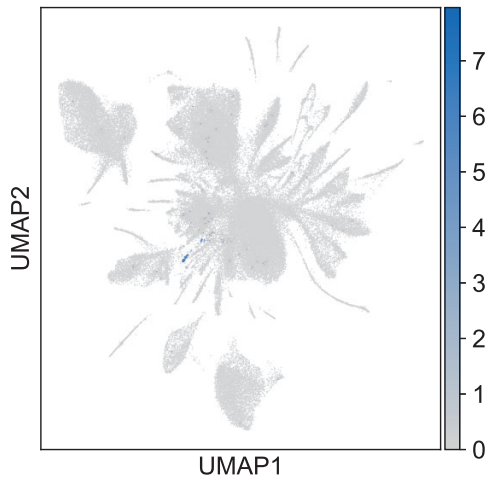

PrileiEVm019713t1

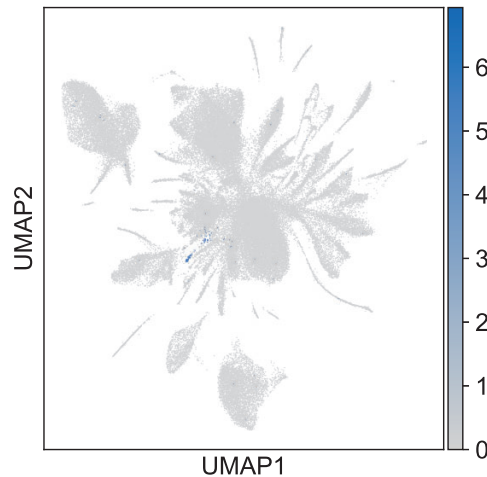

PrileiEVm016167t1

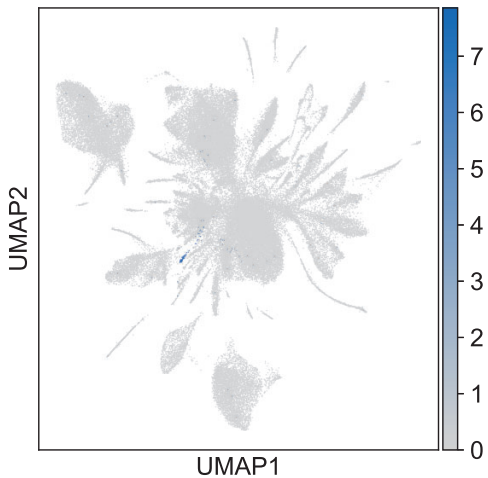

PrileiEVm009320t1

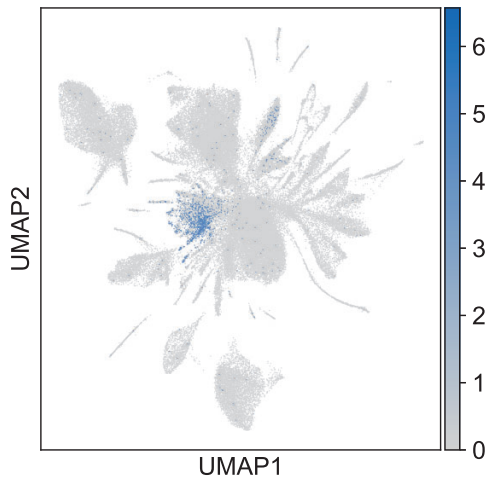

PrileiEVm008752t1

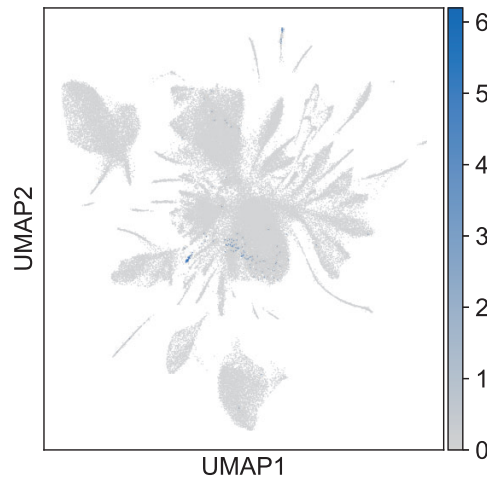



leiden\_1.5 cluster 41

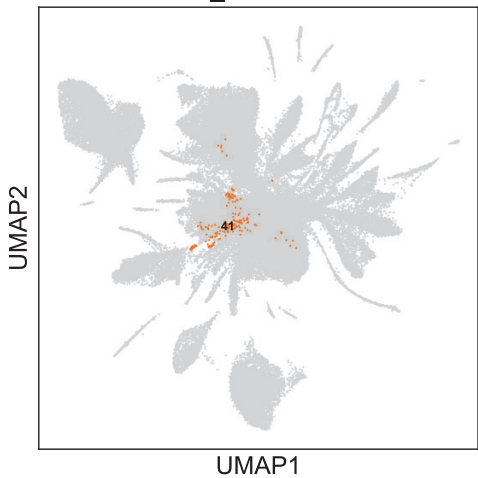

PrileiEVm014392t1

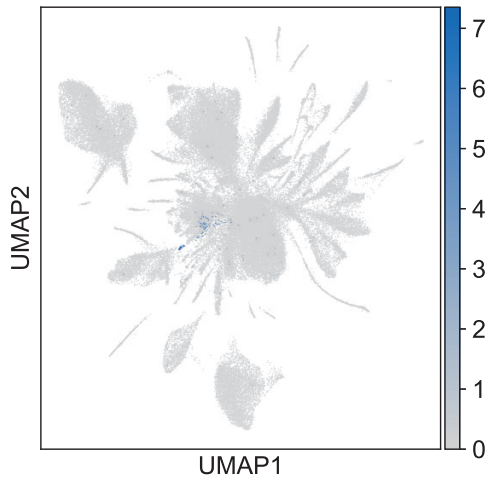

PrileiEVm023848t1

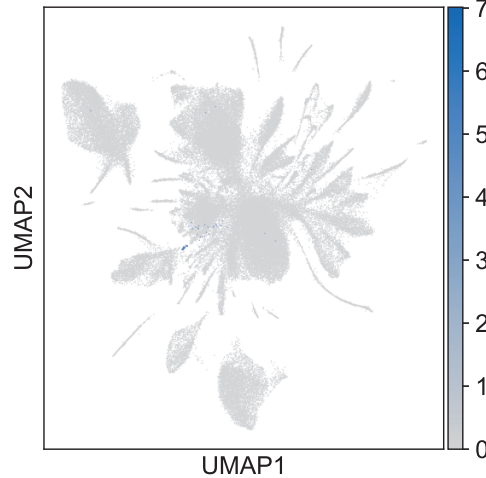

PrileiEVm023390t1

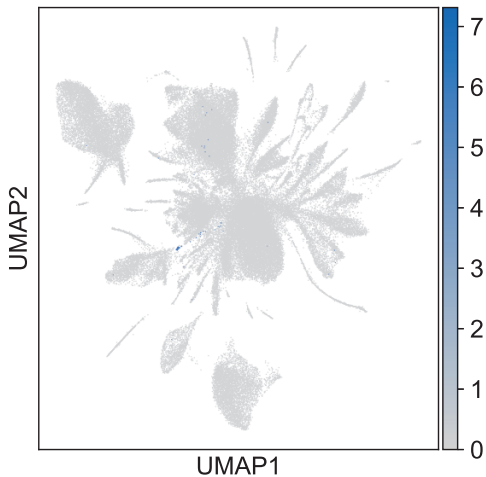

PrileiEVm022148t1

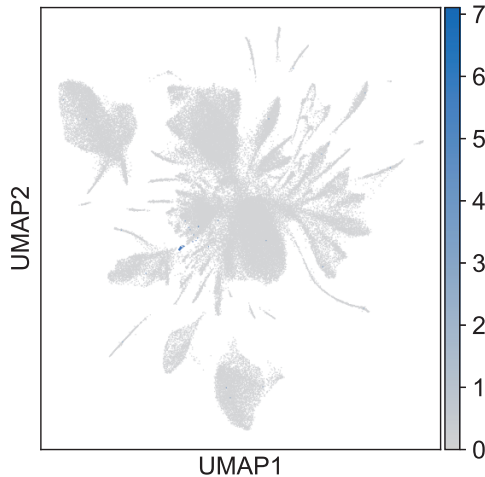

PrileiEVm006795t1

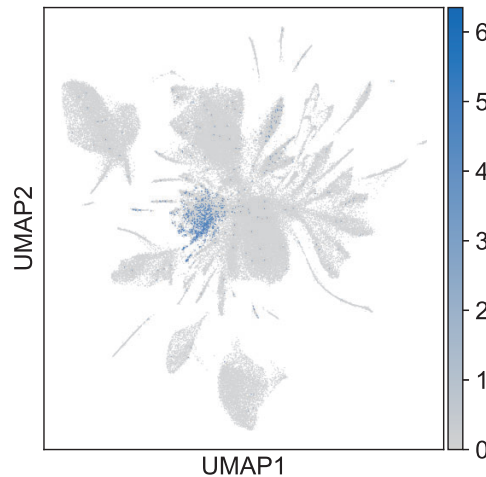

PrileiEVm019117t1

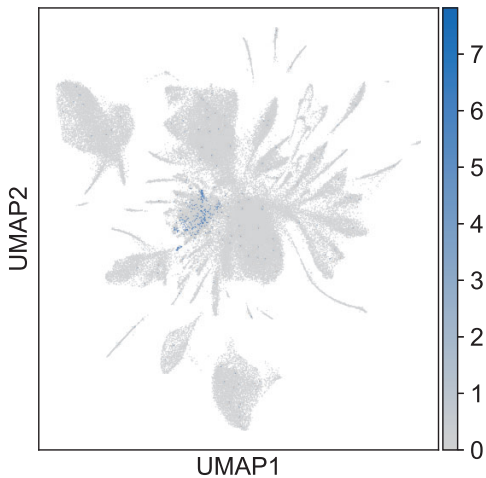

PrileiEVm017097t1

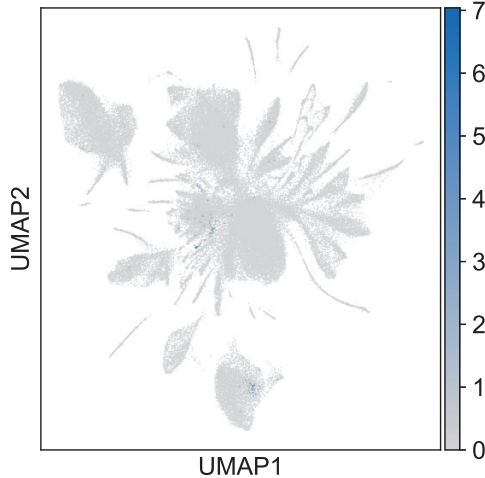

PrileiEVm024063t1

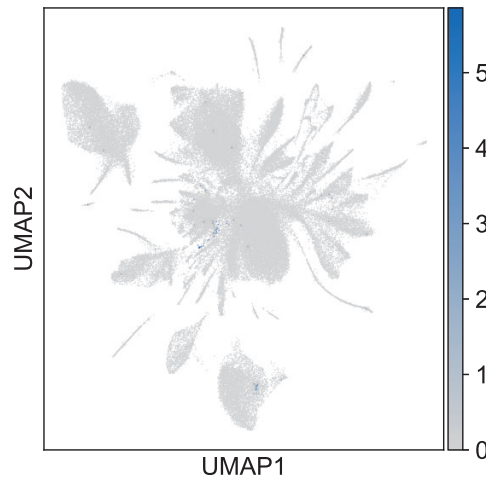

leiden\_1.5 cluster 42

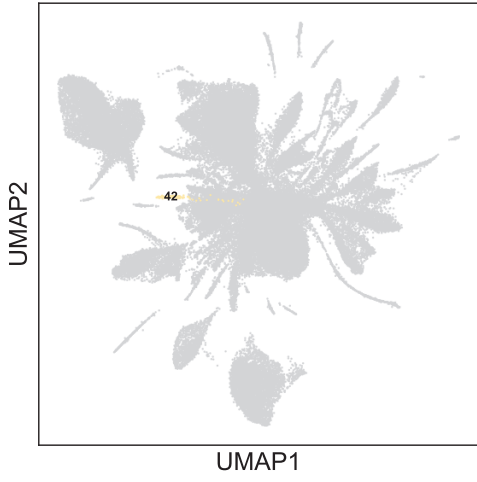

PrileiEVm004554t1

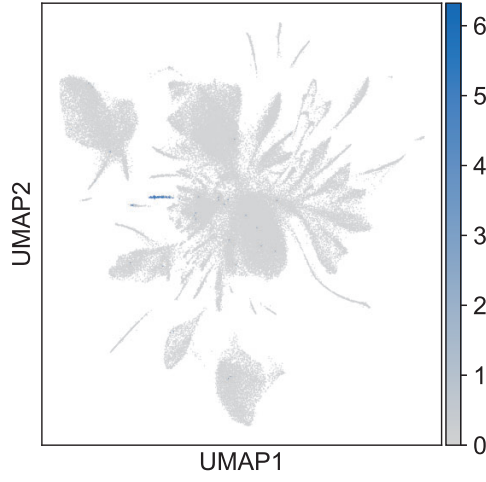

PrileiEVm000101t1

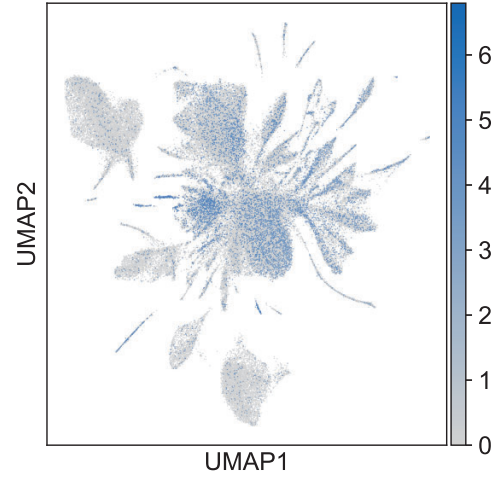

PrileiEVm000090t1

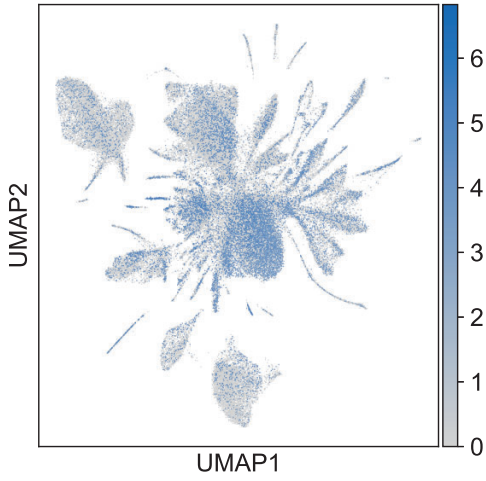

PrileiEVm013825t1

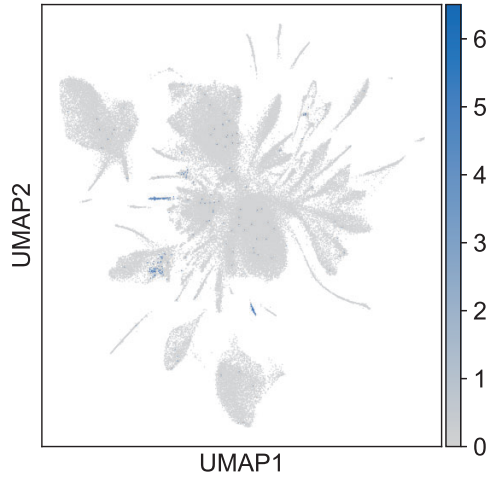

PrileiEVm016714t1

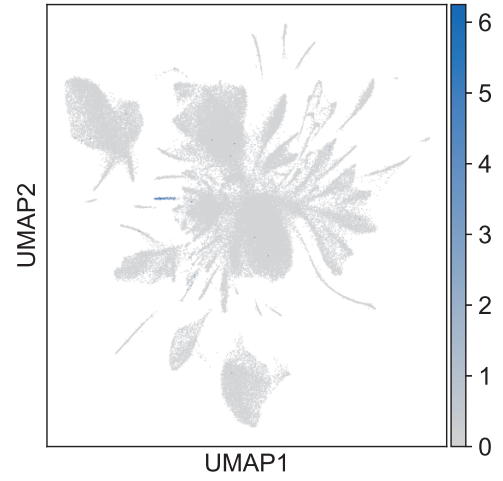

PrileiEVm023617t1

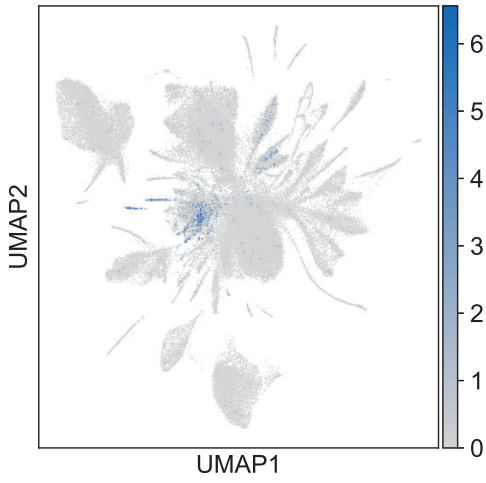

PrileiEVm019169t1

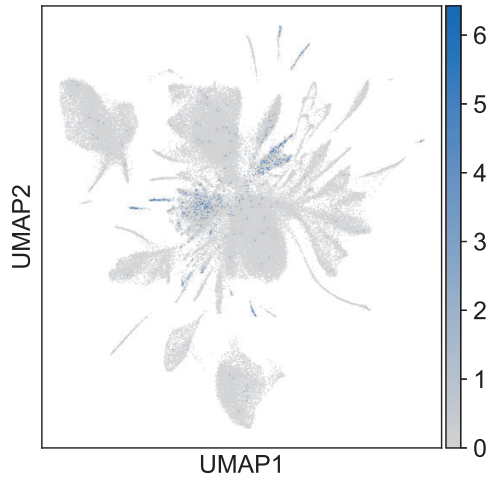

PrileiEVm011116t1

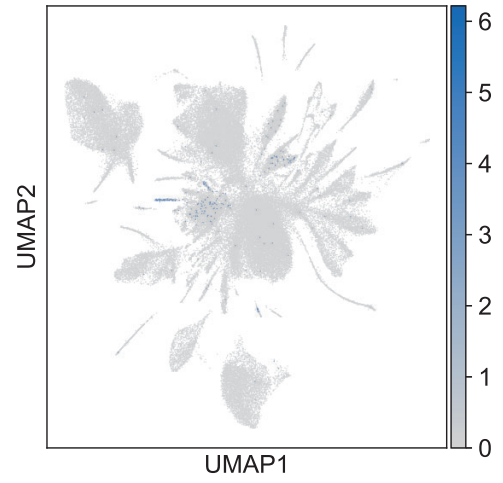

leiden\_1.5 cluster 43

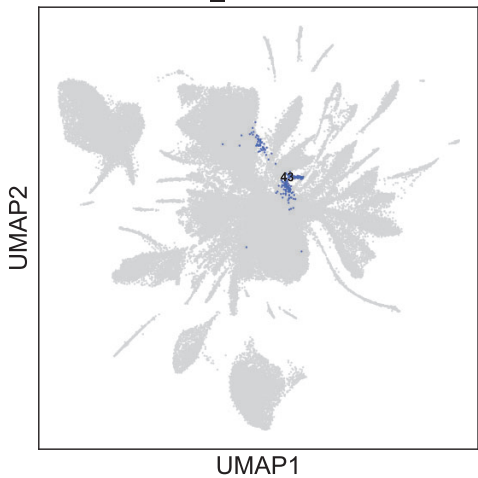

PrileiEVm031631t1

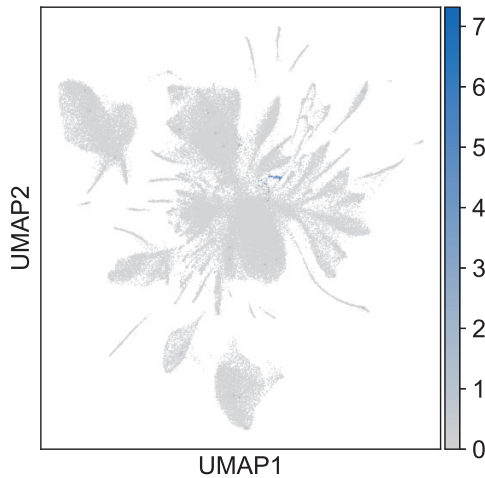

PrileiEVm025834t1

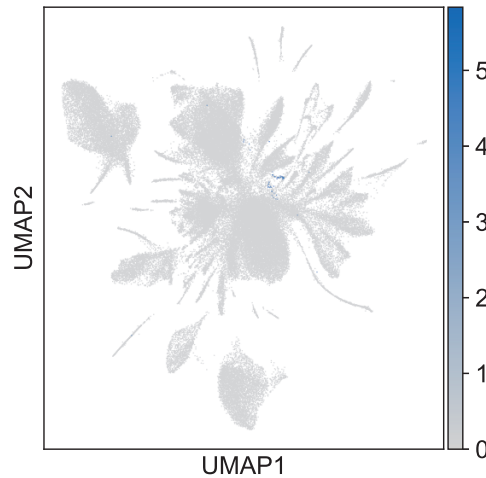

PrileiEVm014780t1

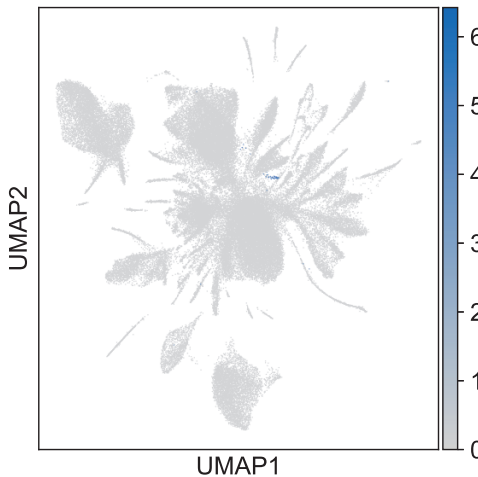

PrileiEVm017082t1

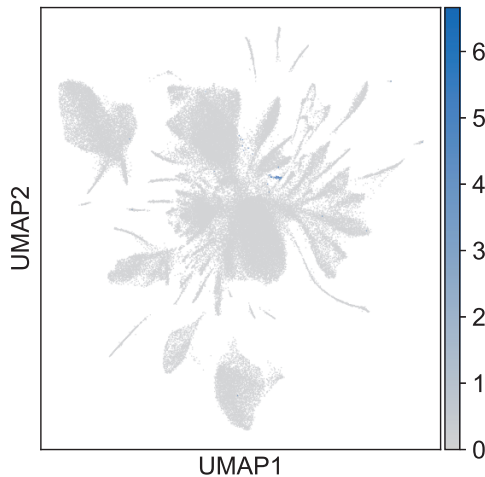

PrileiEVm026114t1

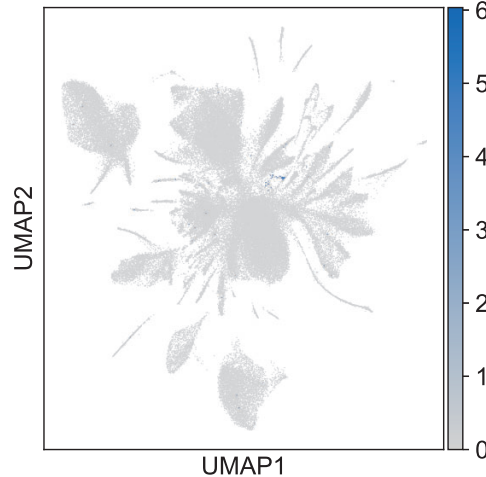

PrileiEVm016954t1

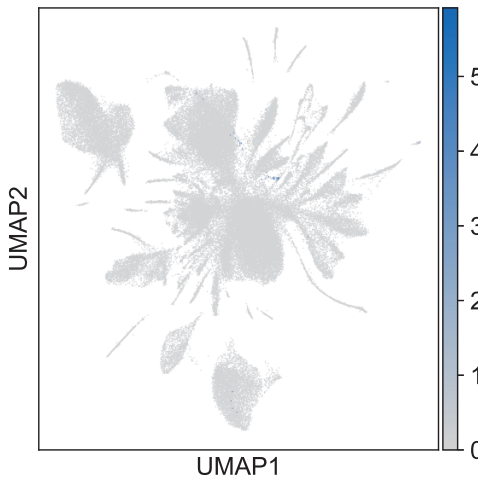

PrileiEVm008287t1

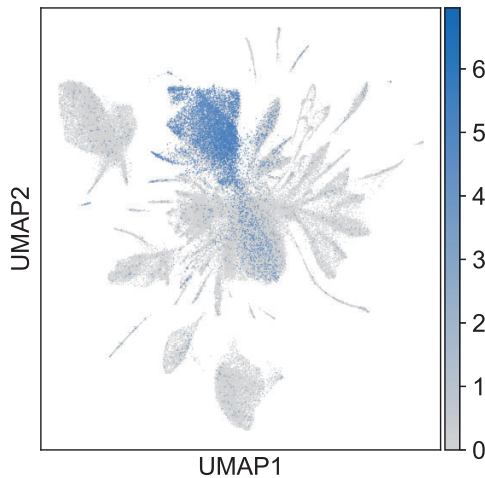

PrileiEVm015089t1

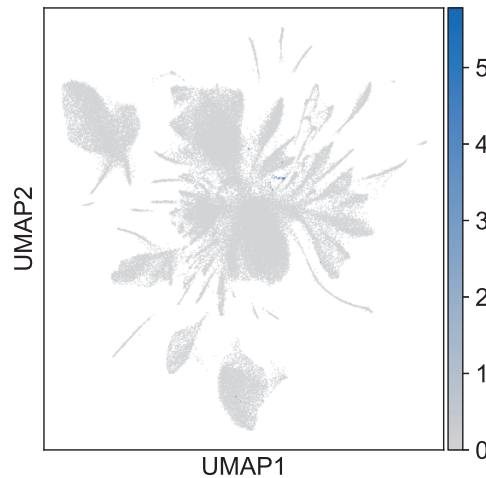



leiden\_1.5 cluster 44

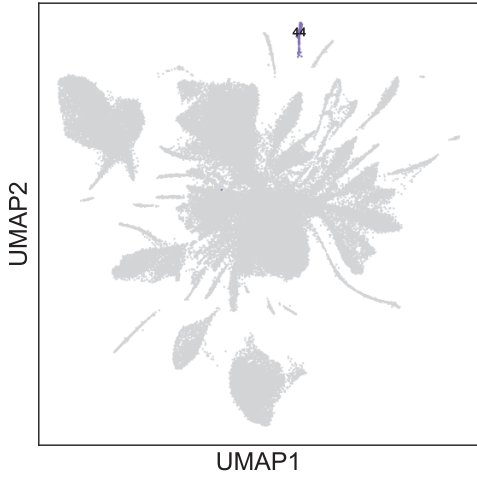

PrileiEVm019725t1

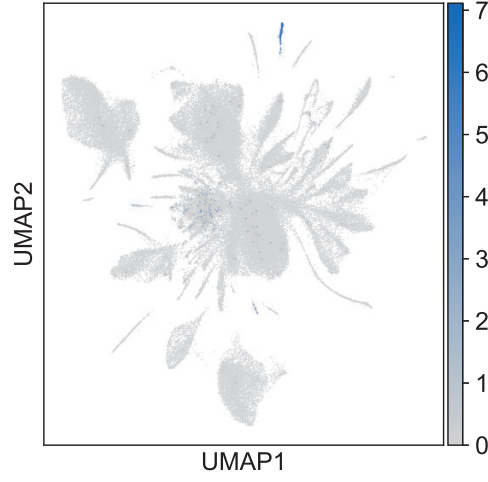

PrileiEVm000325t1

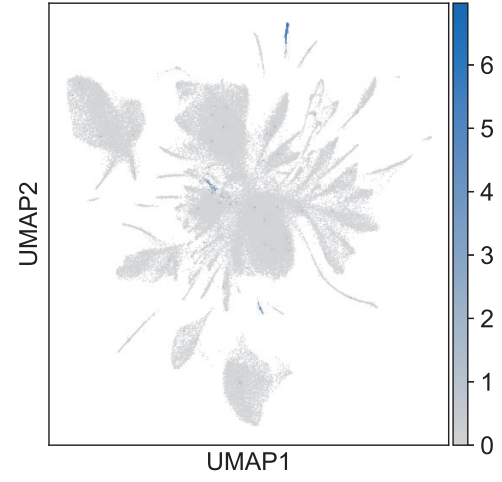

PrileiEVm026775t1

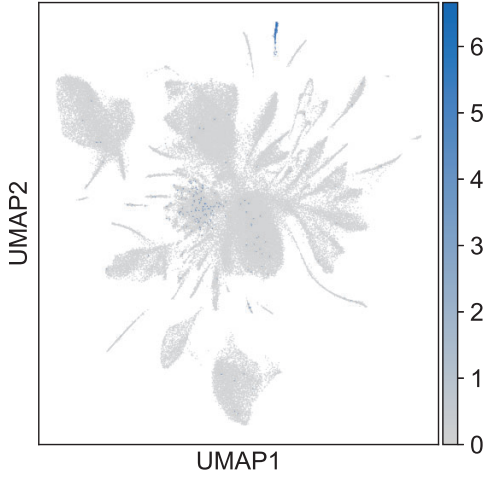

PrileiEVm003378t1

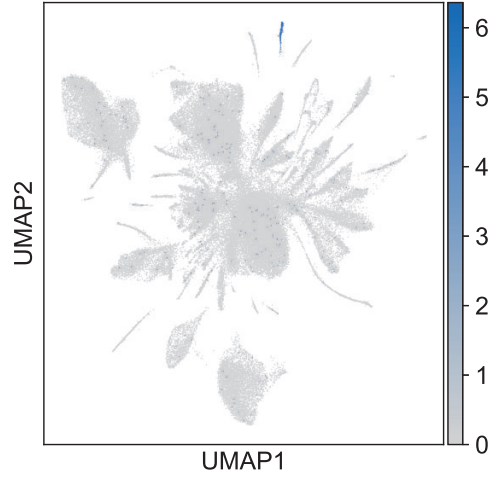

PrileiEVm033892t1

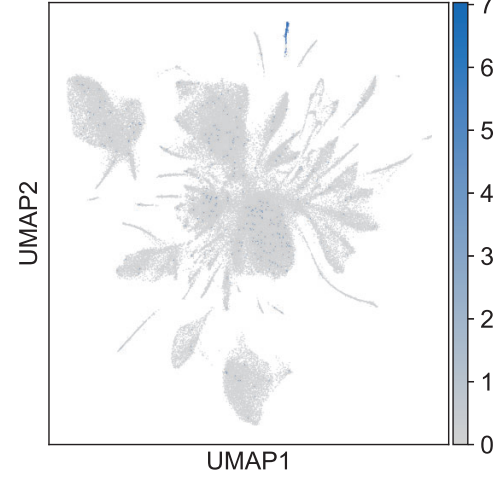

PrileiEVm005494t1

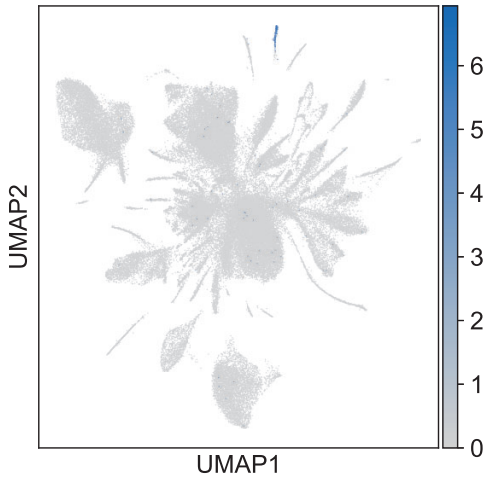

PrileiEVm004821t1

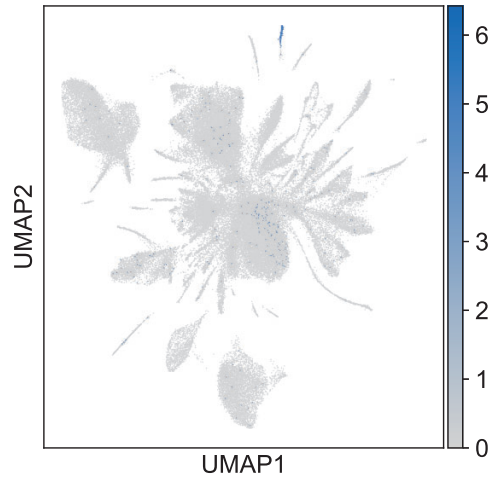

PrileiEVm032414t1

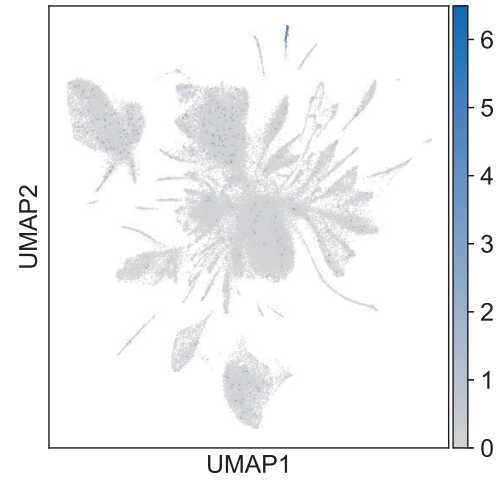

leiden\_1.5 cluster 45

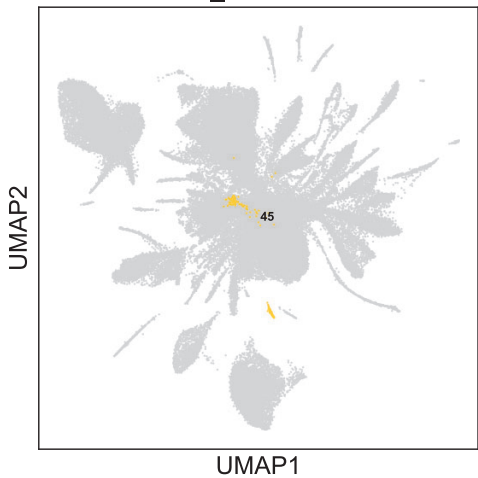

PrileiEVm000373t1

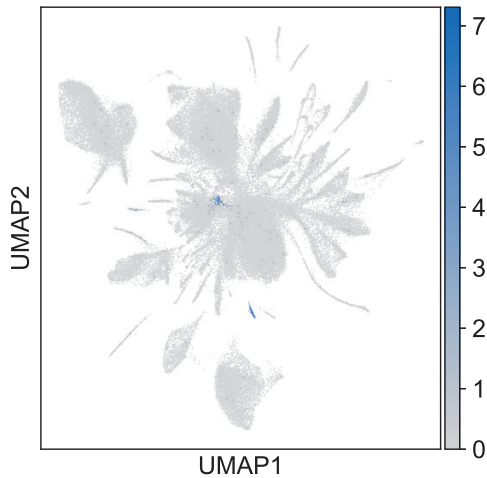

PrileiEVm000120t1

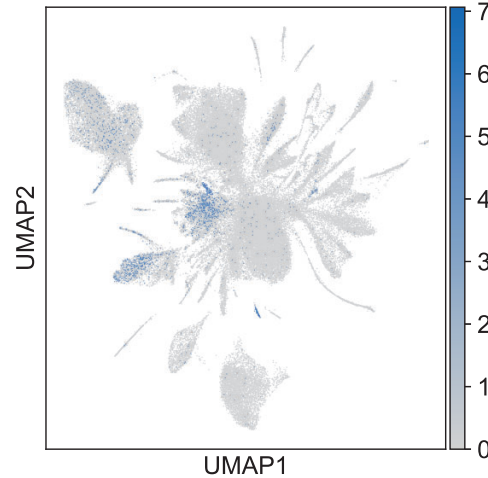

PrileiEVm015601t1

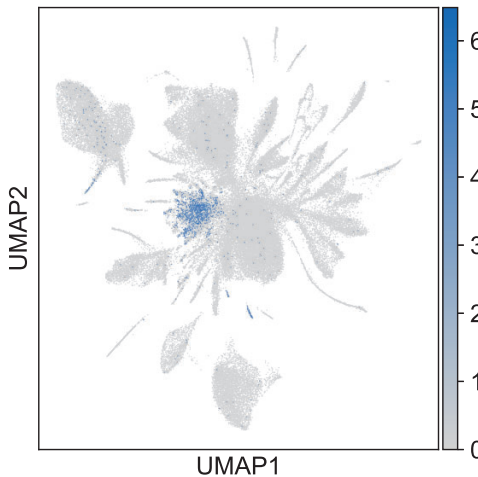

PrileiEVm001875t1

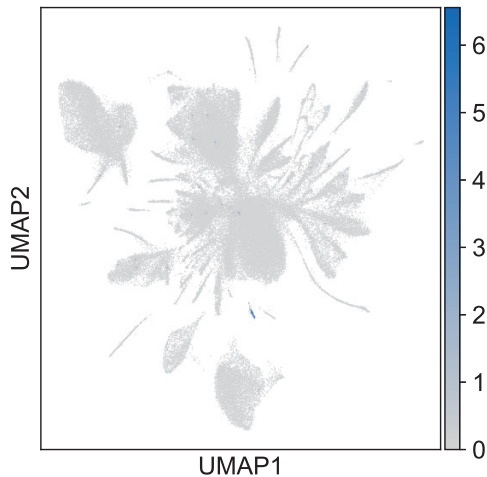

PrileiEVm000101t1

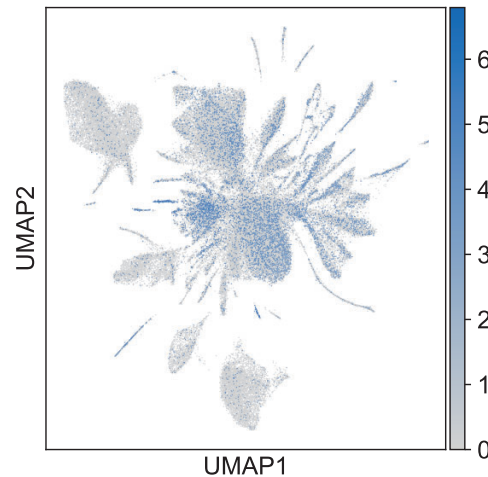

PrileiEVm013825t1

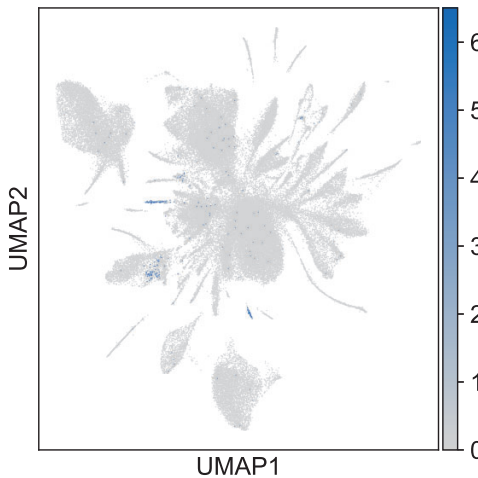

PrileiEVm019169t1

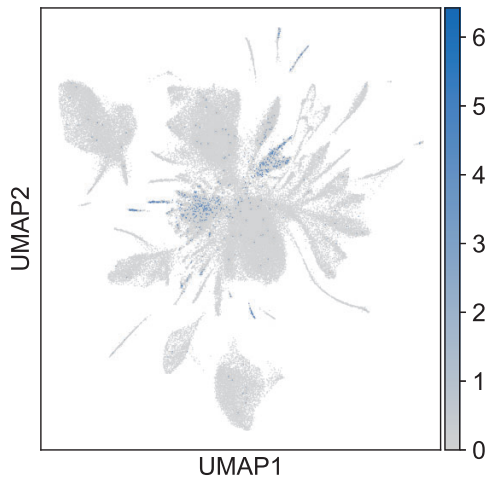

PrileiEVm000090t1

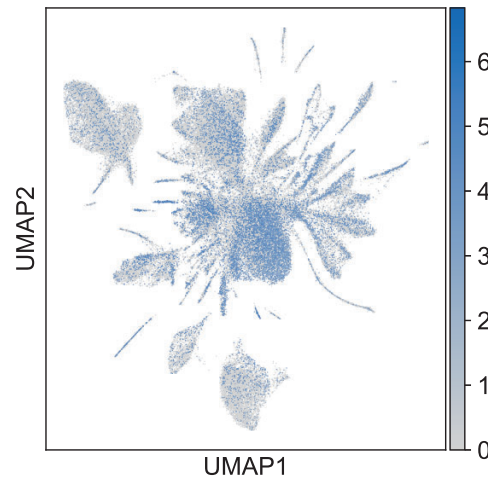

leiden\_1.5 cluster 46

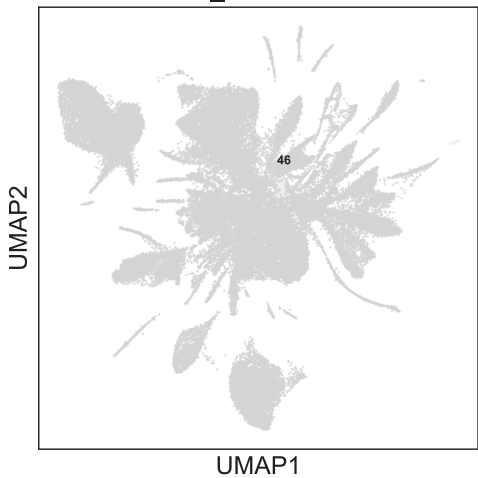

PrileiEVm016049t1

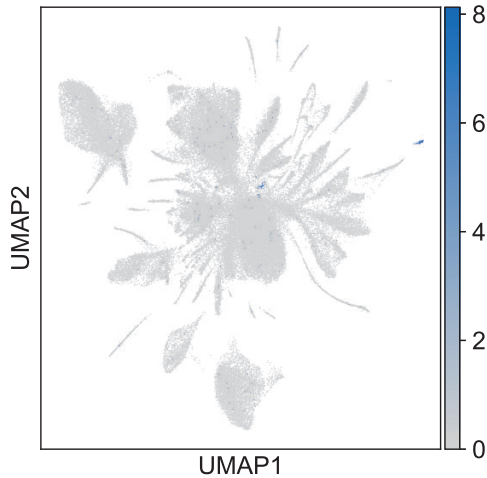

PrileiEVm016023t1

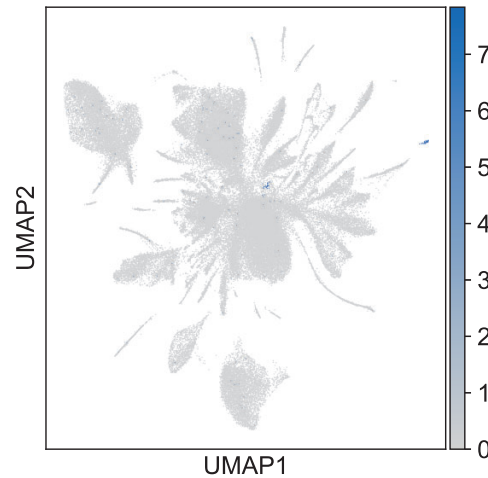

PrileiEVm030027t1

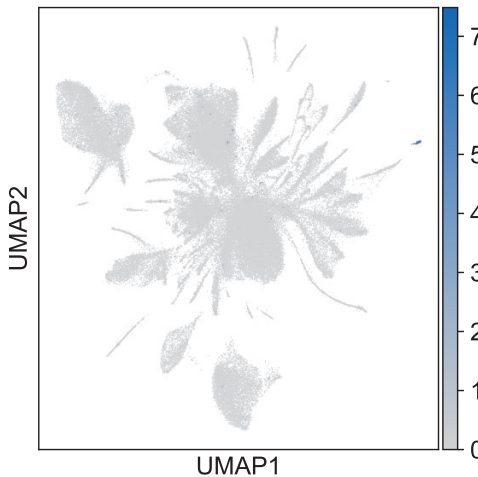

PrileiEVm024693t1

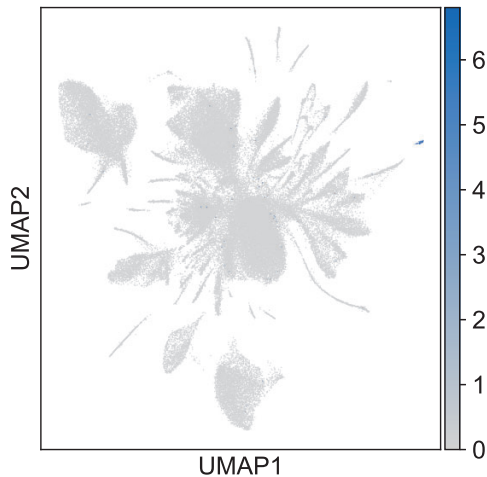

PrileiEVm025209t1

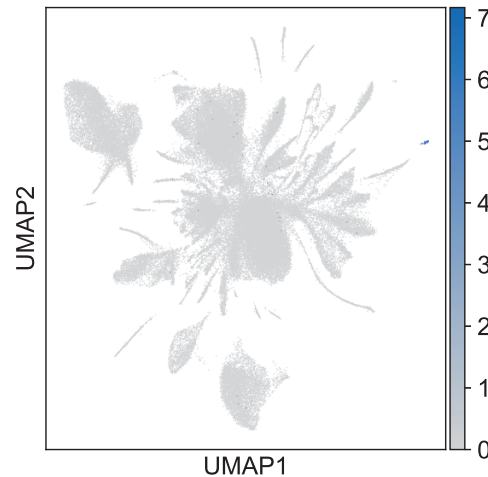

PrileiEVm022585t1

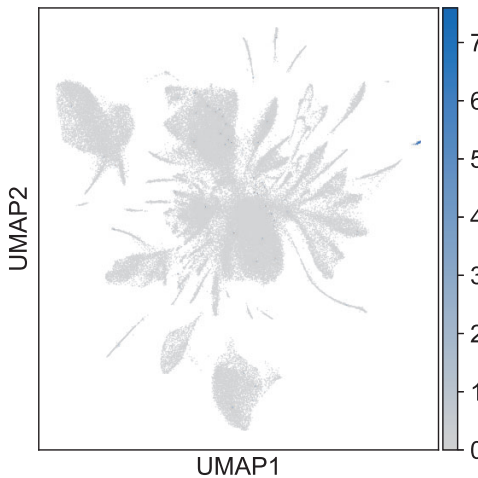

PrileiEVm026429t1

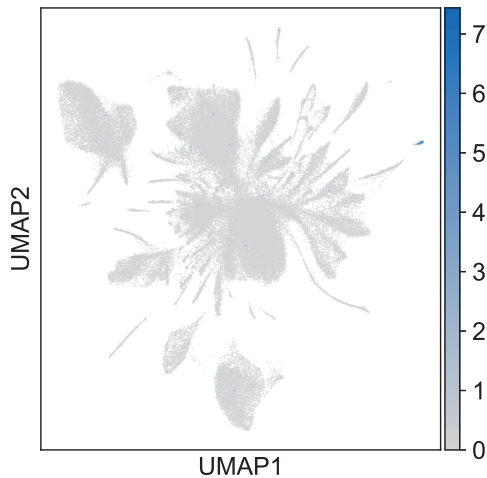

PrileiEVm022589t1

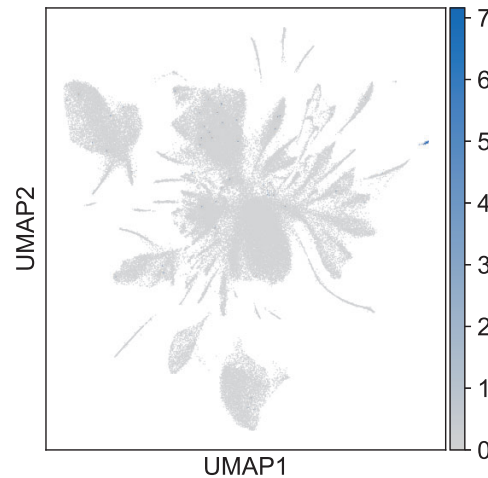



leiden\_1.5 cluster 47

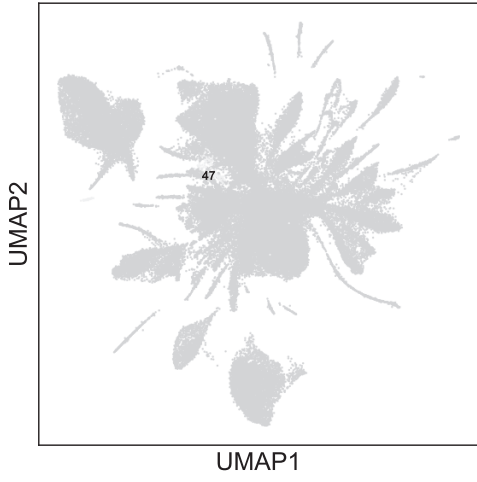

PrileiEVm004849t1

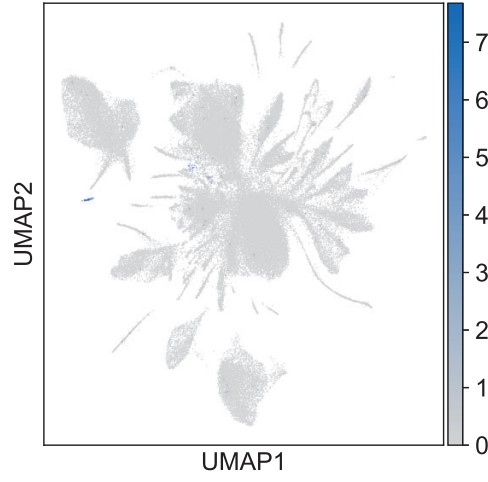

PrileiEVm027635t1

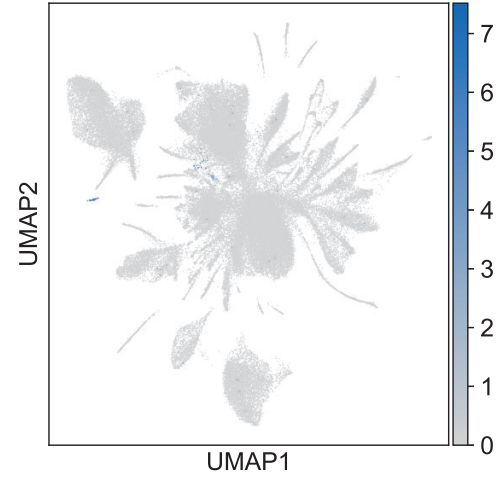

PrileiEVm016449t1

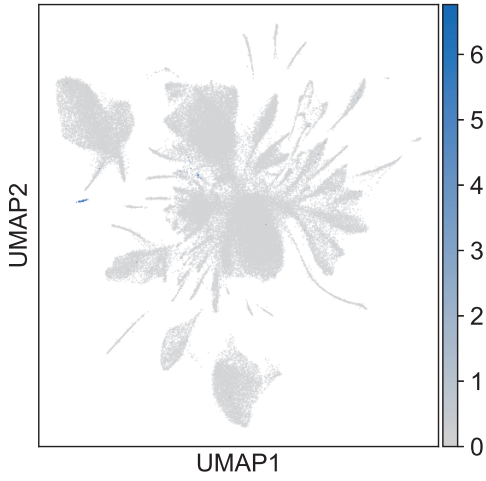

PrileiEVm008287t1

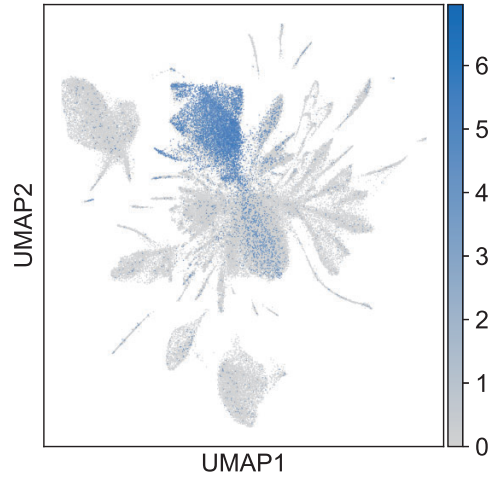

PrileiEVm016028t1

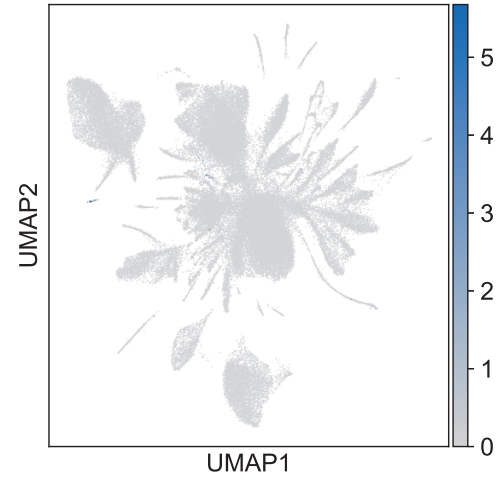

PrileiEVm020156t1

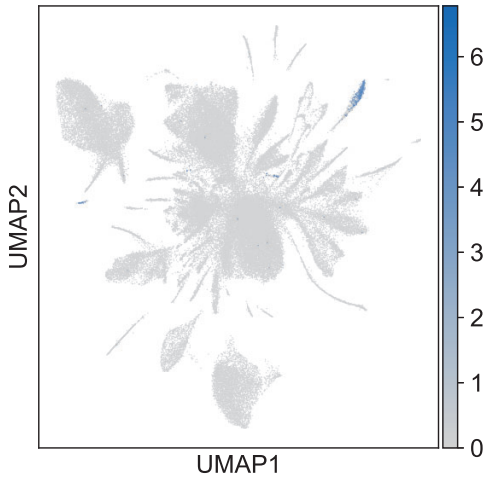

PrileiEVm021489t1

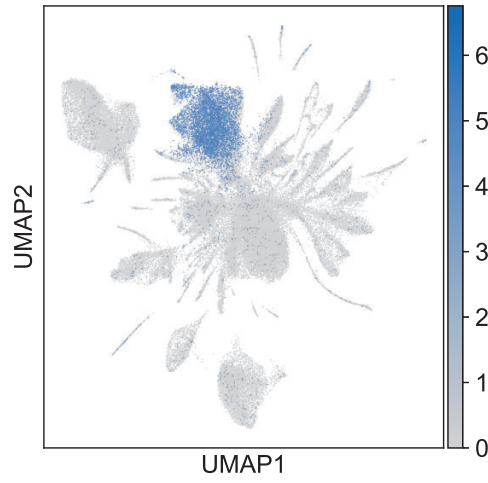

PrileiEVm017189t1

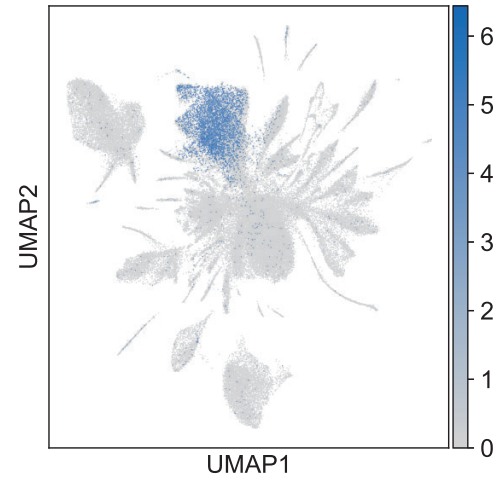

leiden\_1.5 cluster 48

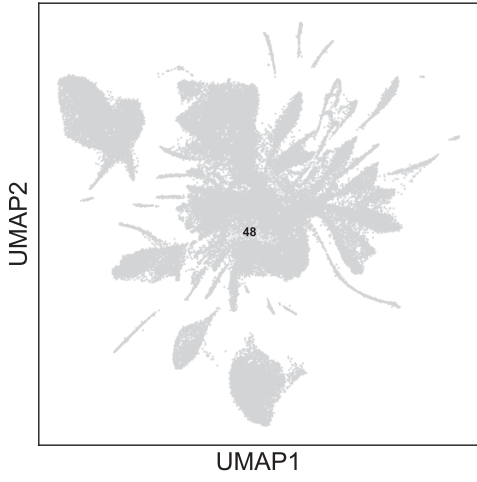

PrileiEVm013912t1

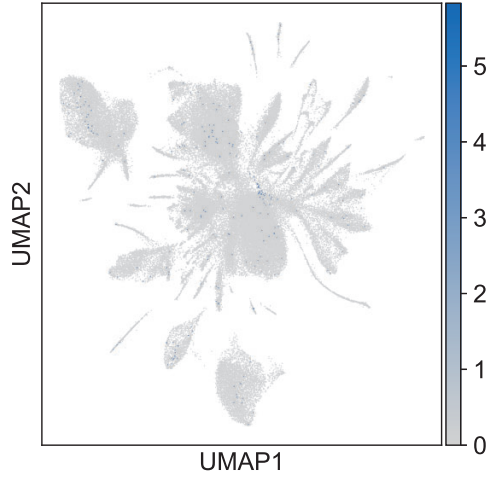

PrileiEVm022611t1

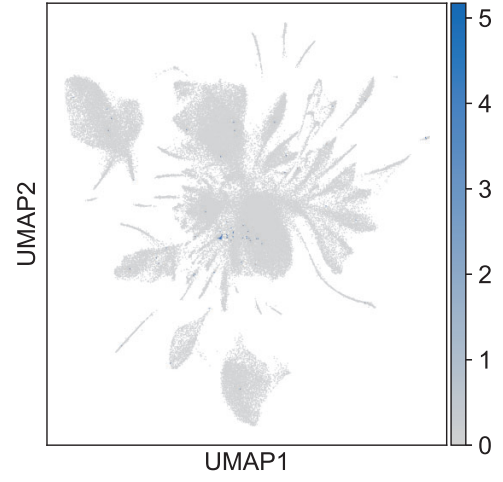

PrileiEVm027641t1

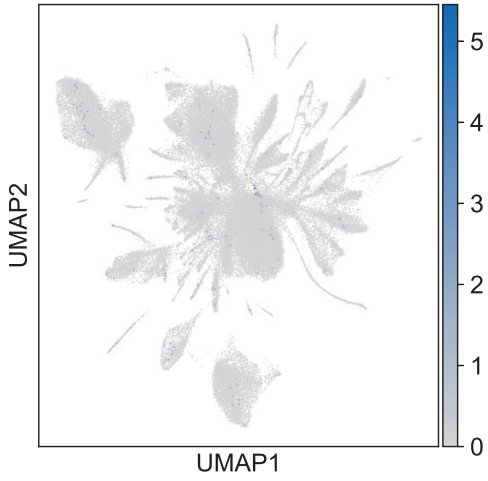

PrileiEVm012517t1

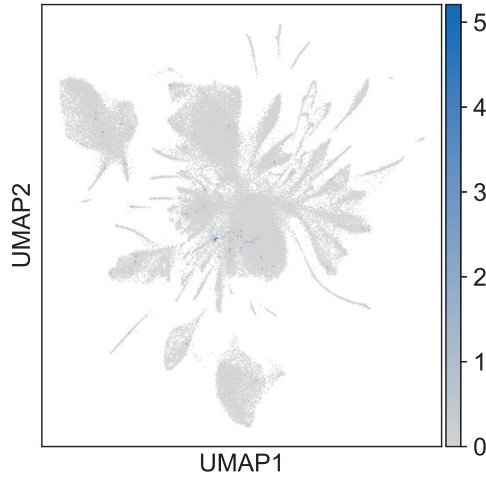

PrileiEVm012265t1

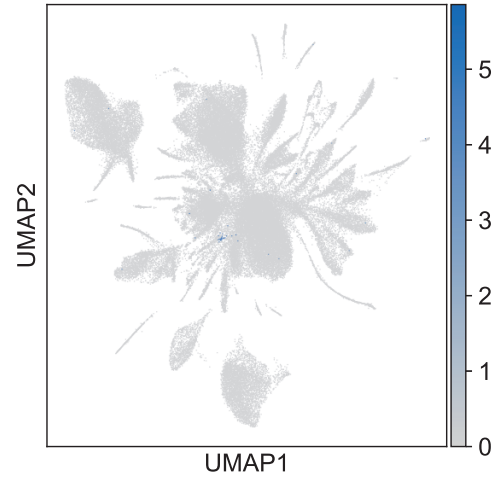

PrileiEVm021027t1

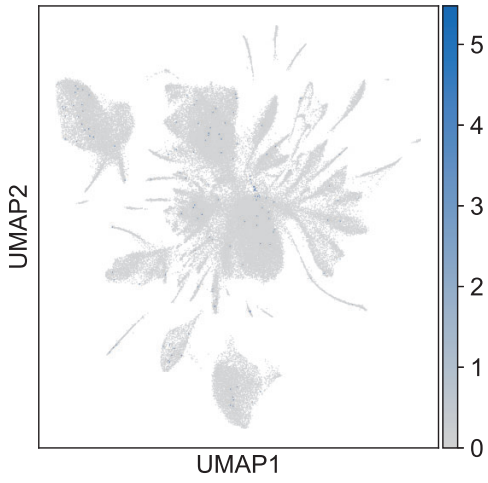

PrileiEVm012511t1

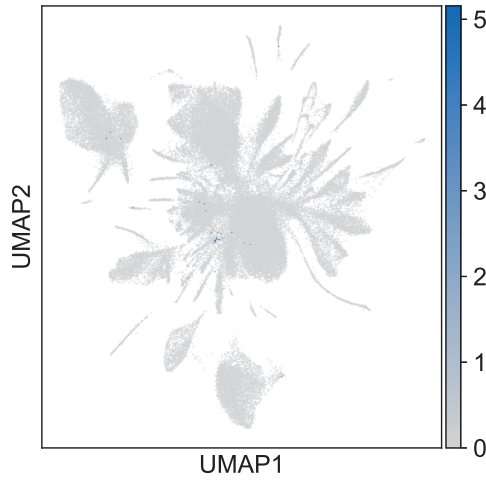

PrileiEVm012534t1

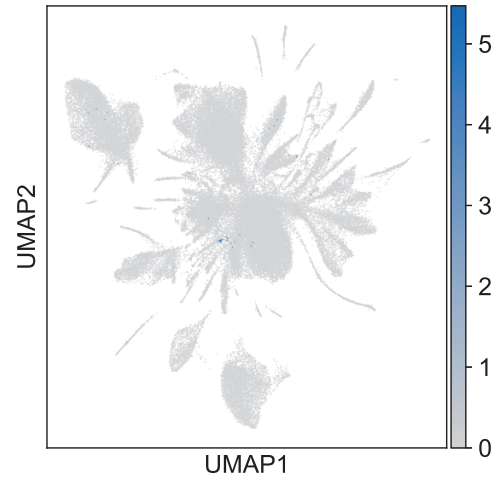

leiden\_1.5 cluster 49

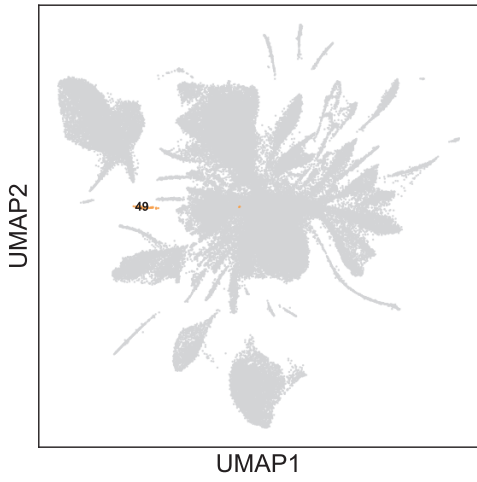

PrileiEVm019757t1

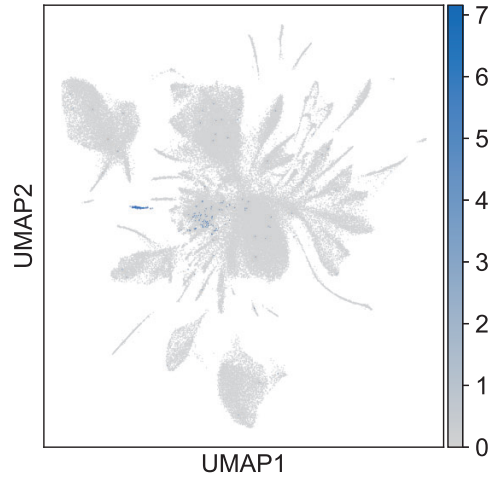

PrileiEVm018856t1

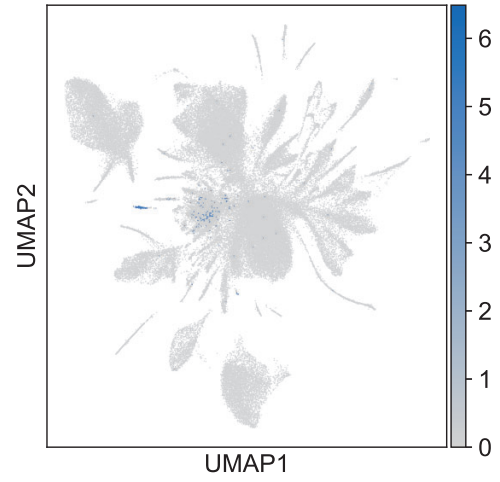

PrileiEVm000558t1

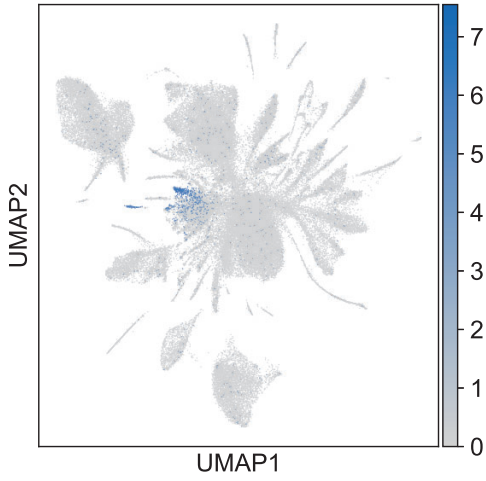

PrileiEVm022927t1

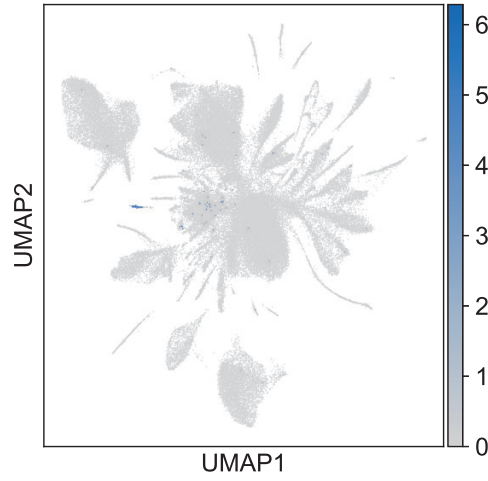

PrileiEVm023617t1

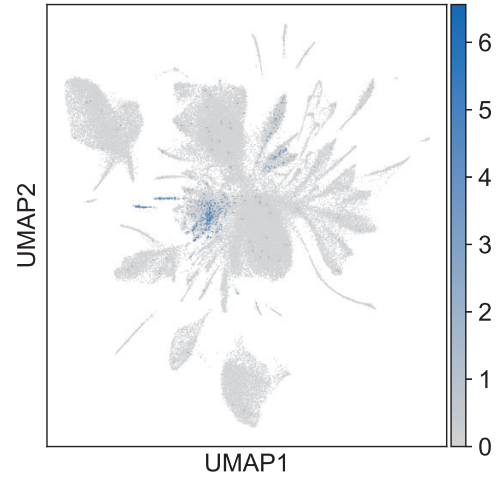

PrileiEVm020164t1

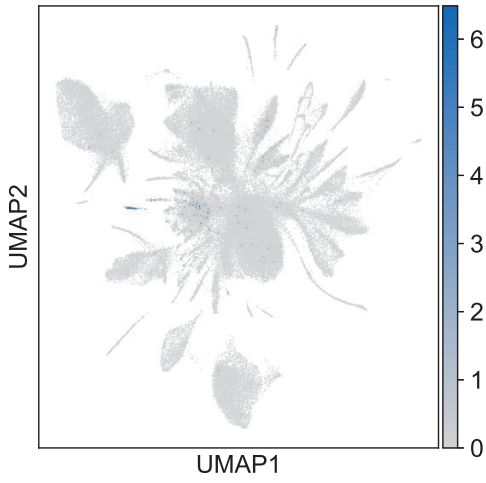

PrileiEVm001590t1

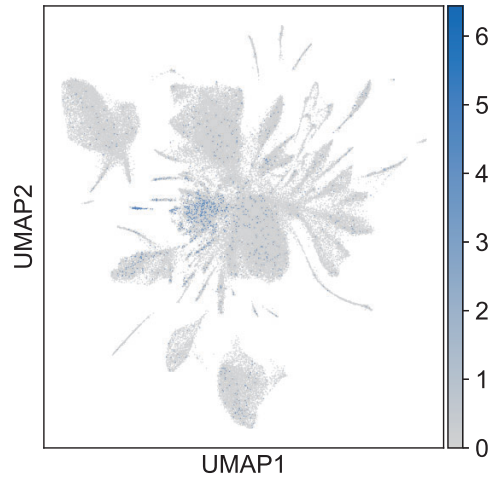

PrileiEVm005729t1

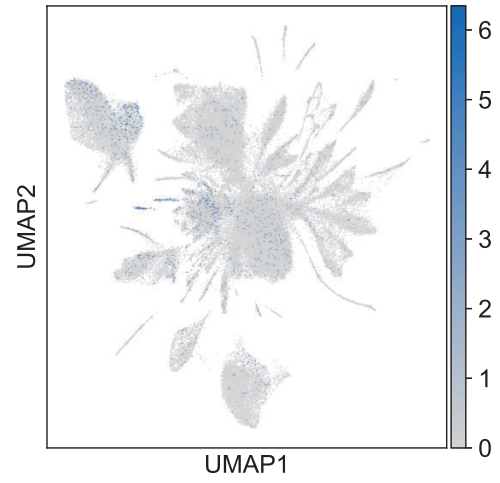



leiden\_1.5 cluster 50

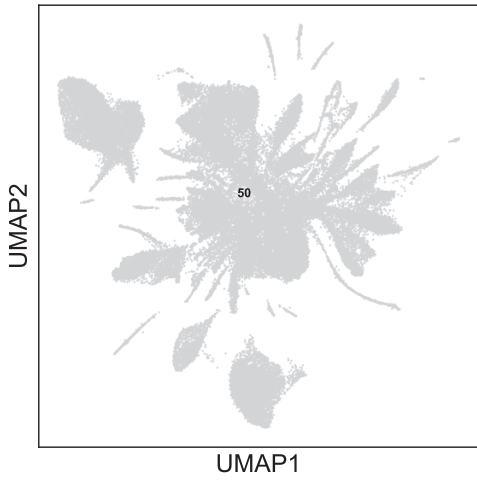

PrileiEVm026853t1

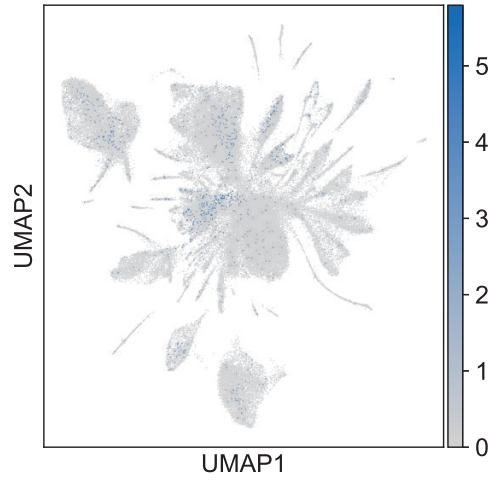

PrileiEVm033043t1

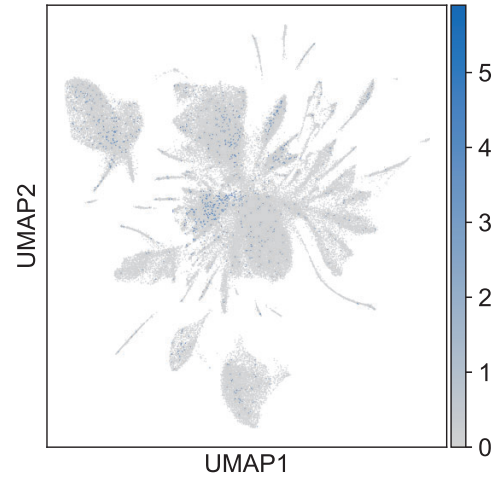

PrileiEVm031618t1

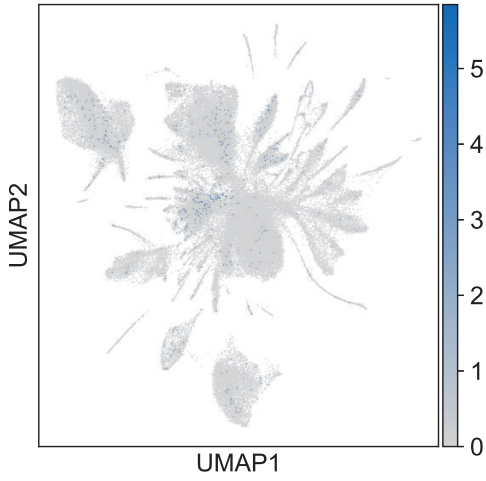

PrileiEVm023809t1

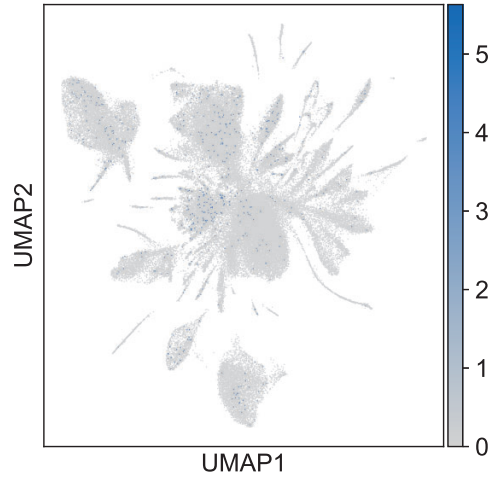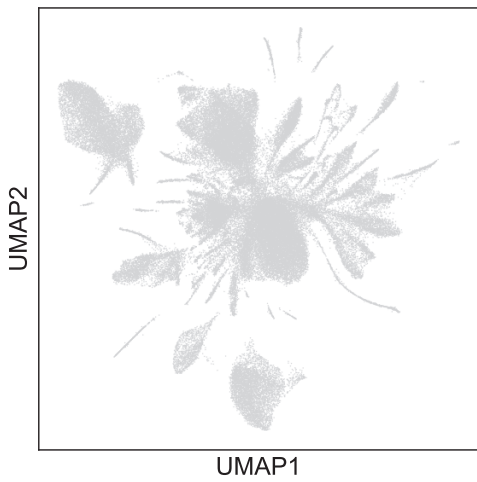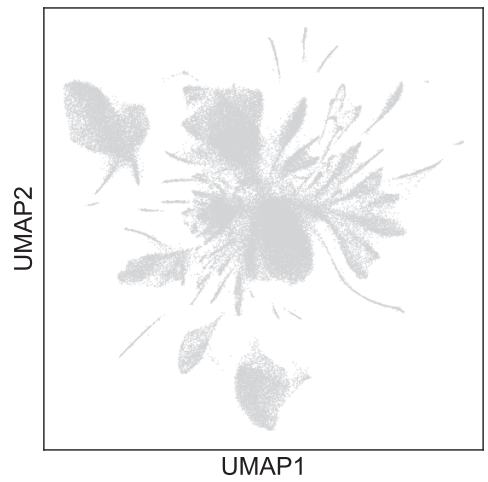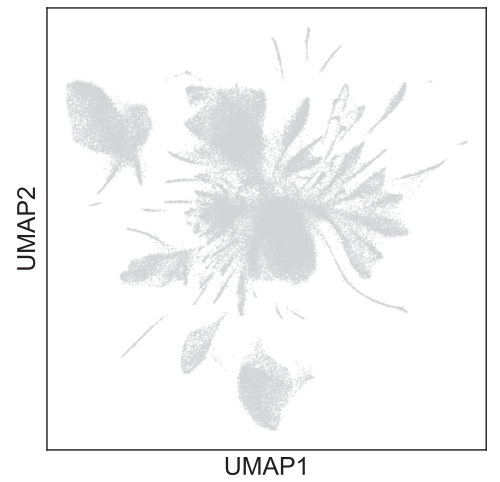

leiden\_1.5 cluster 51

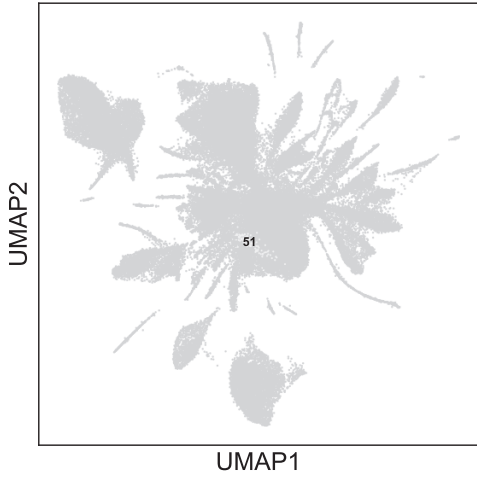

PrileiEVm008752t1

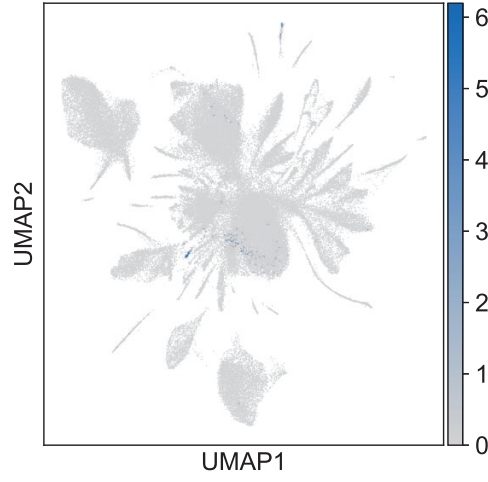

PrileiEVm023936t1

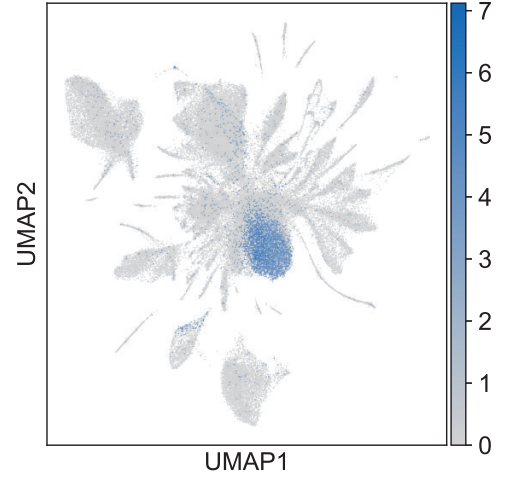

PrileiEVm022498t1

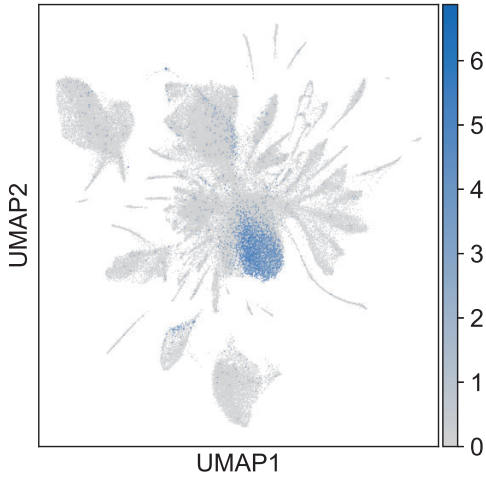

PrileiEVm016167t1

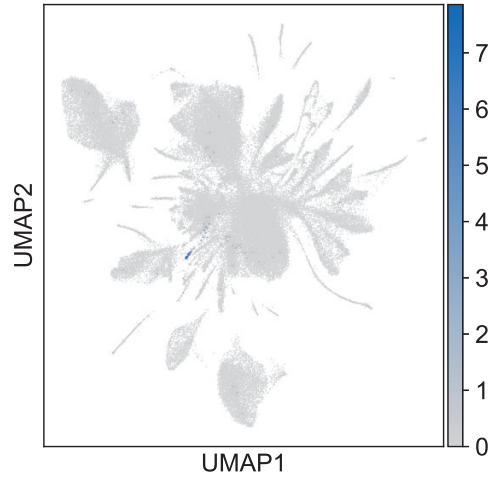

PrileiEVm030296t1

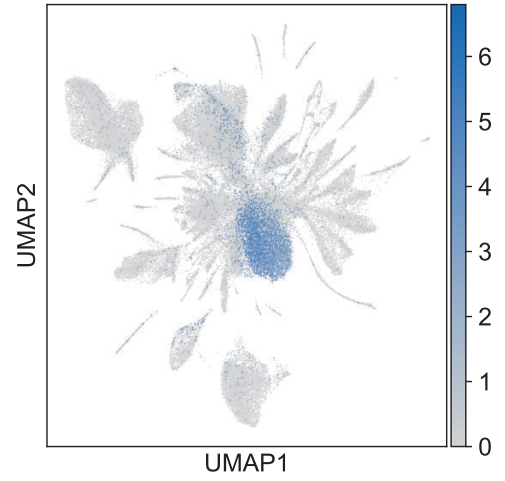

PrileiEVm009984t1

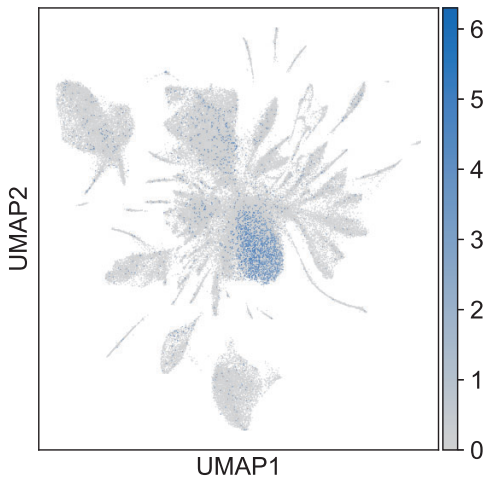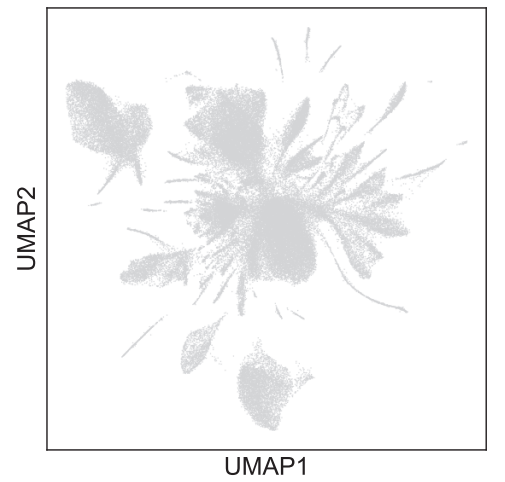

leiden\_1.5 cluster 52

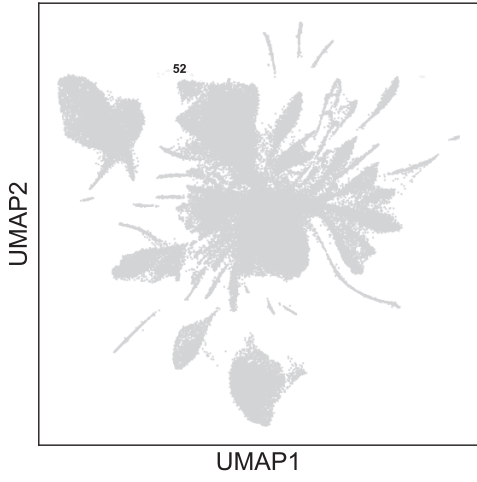

PrileiEVm022396t1

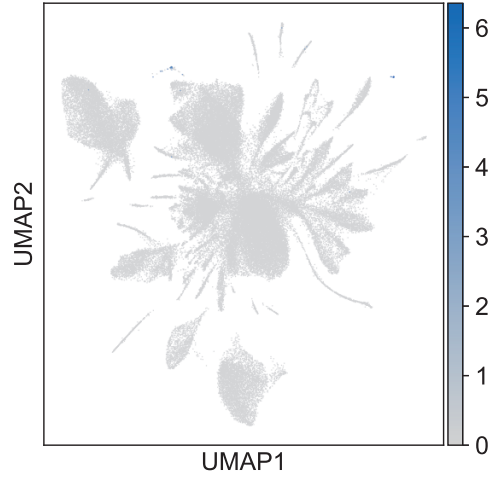

PrileiEVm020197t1

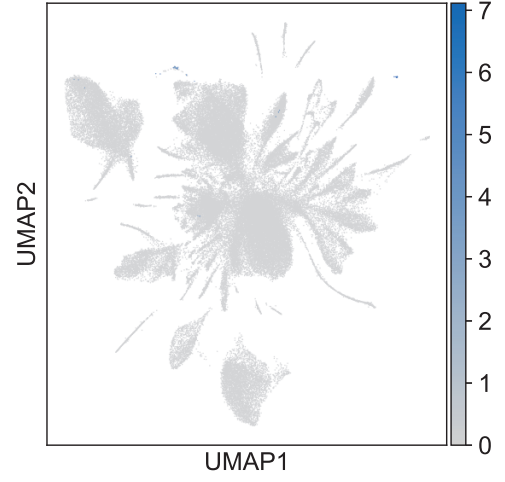

PrileiEVm018839t1

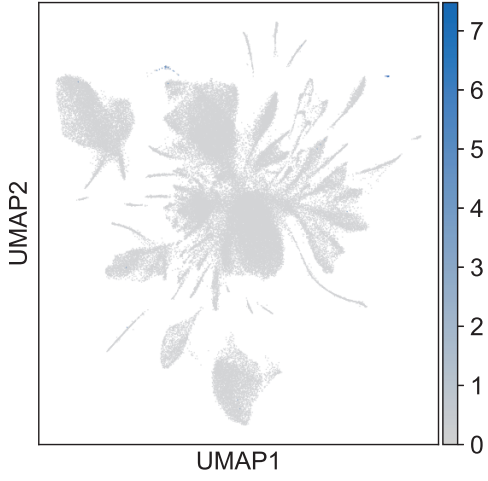

PrileiEVm018805t1

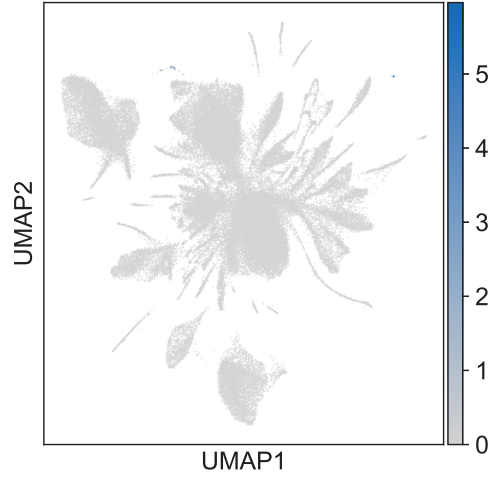

PrileiEVm021312t1

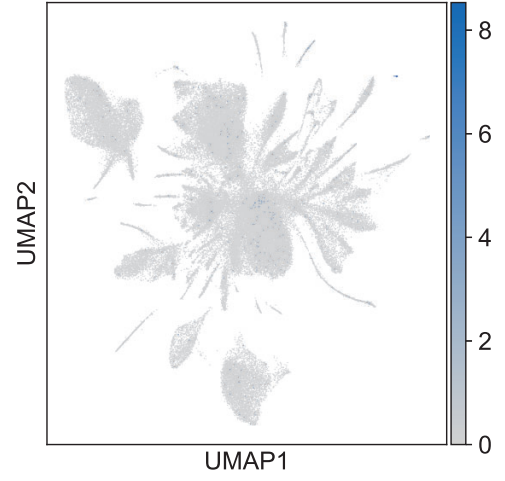

PrileiEVm024211t1

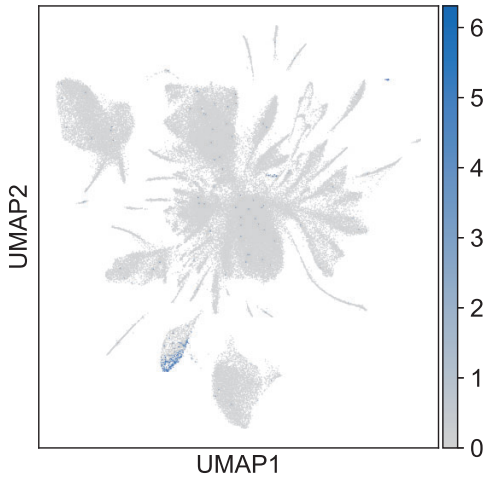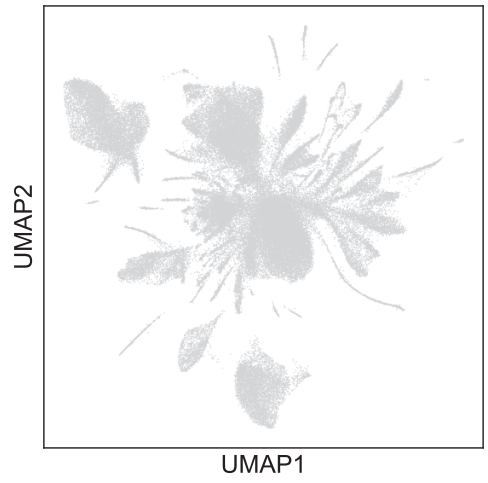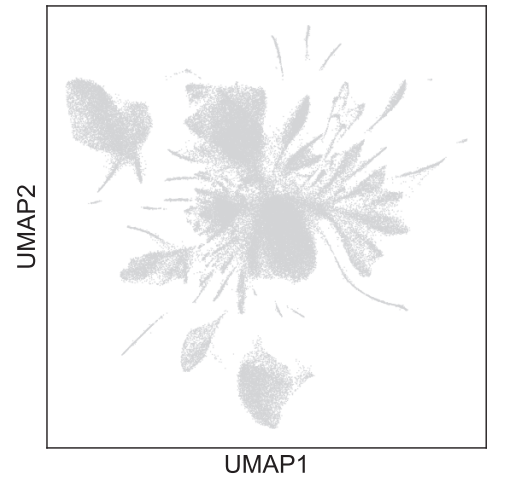



leiden\_1.5 cluster 53

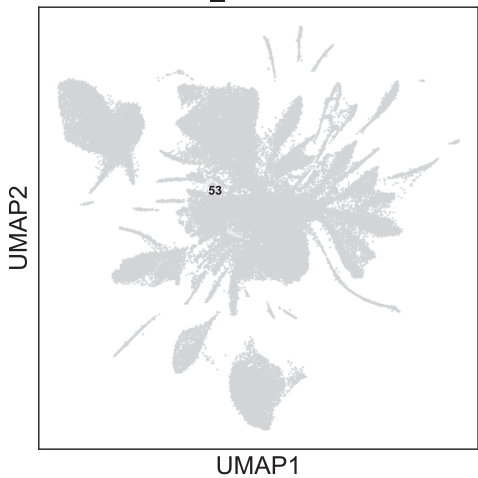

PrileiEVm007789t1

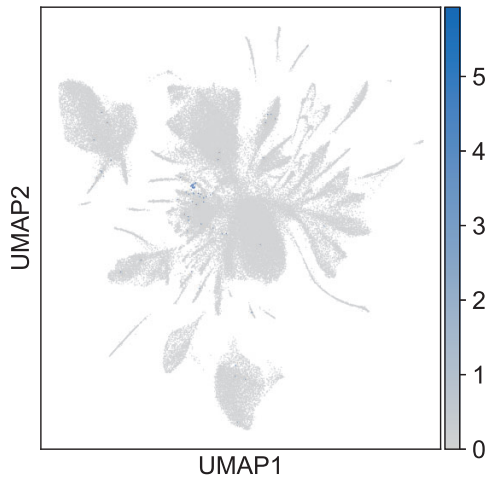

PrileiEVm024308t1

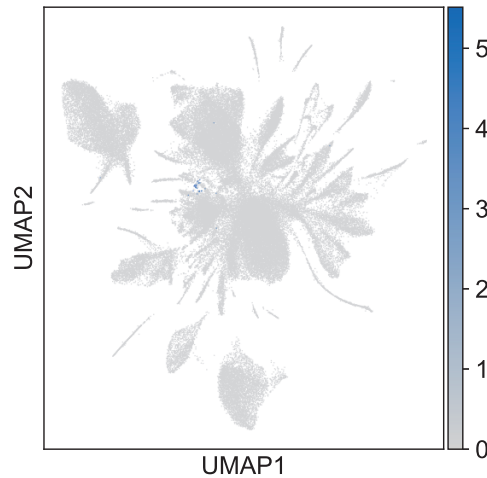

PrileiEVm025670t1

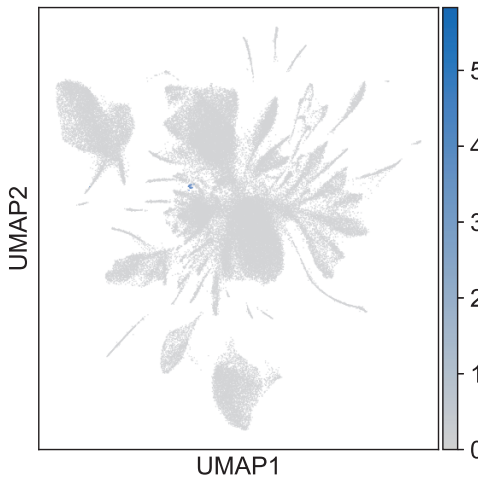

PrileiEVm019907t1

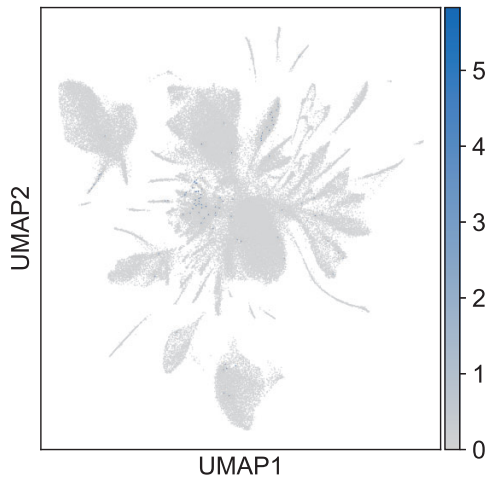

PrileiEVm021820t1

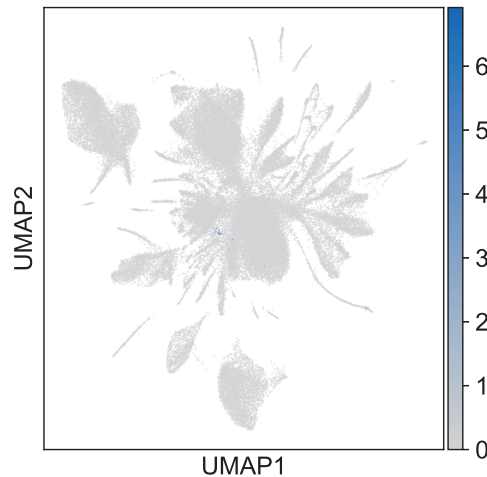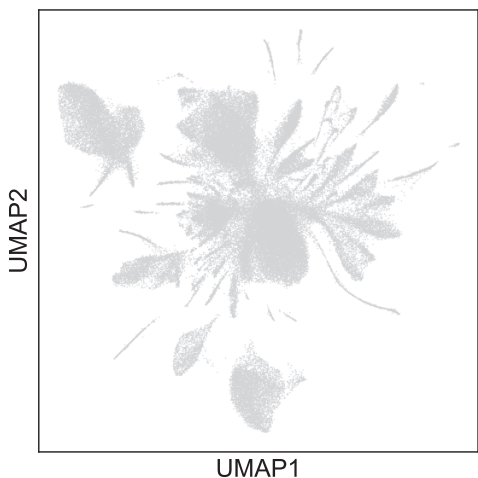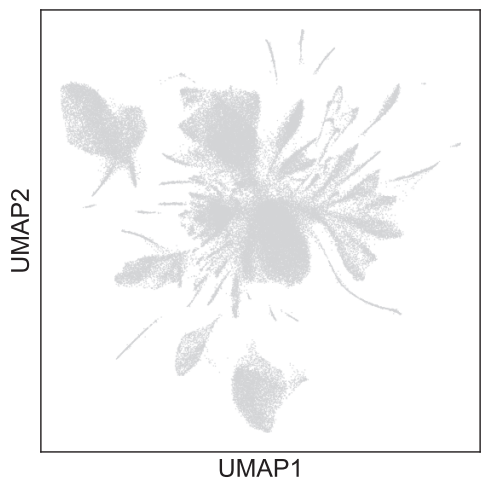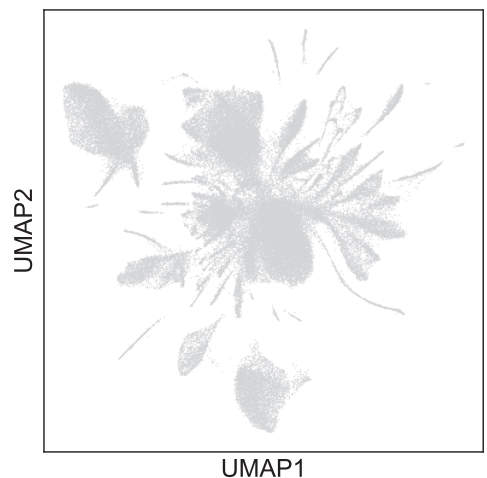

leiden\_1.5 cluster 54

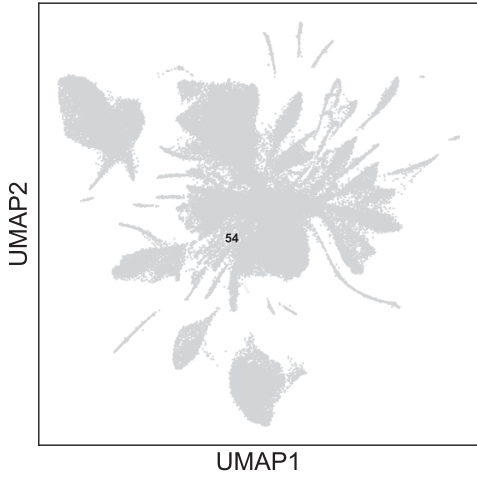

PrileiEVm018475t1

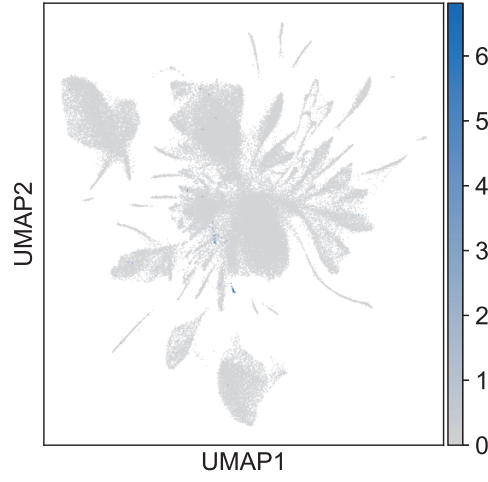

PrileiEVm019295t1

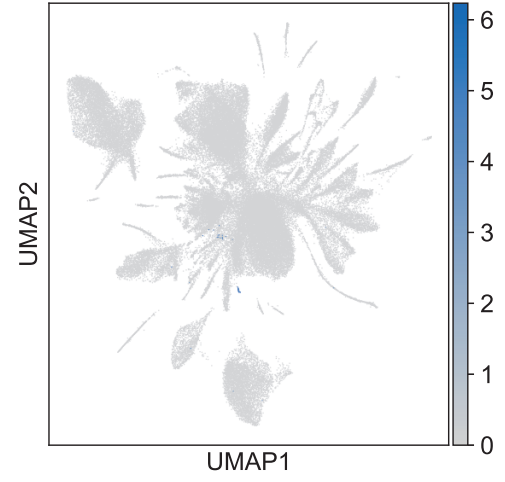

PrileiEVm014918t1

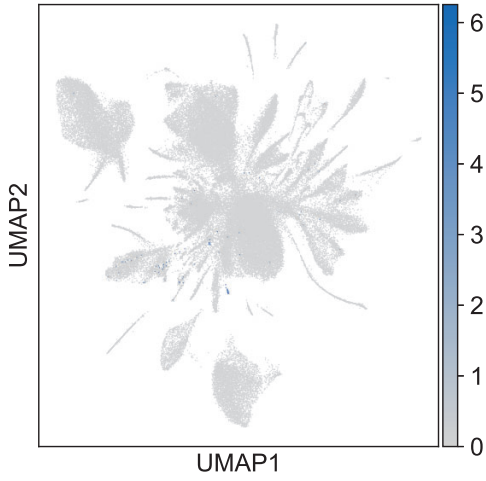

PrileiEVm019081t1

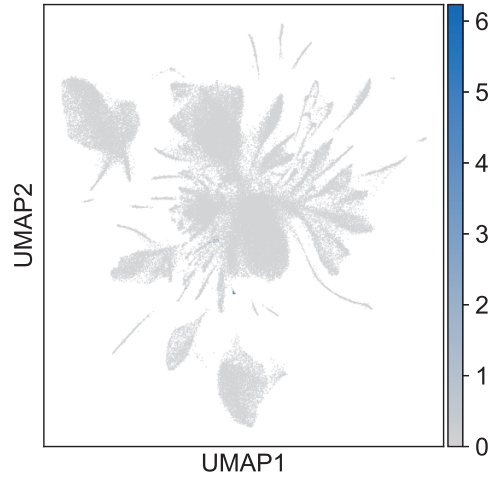

PrileiEVm009797t1

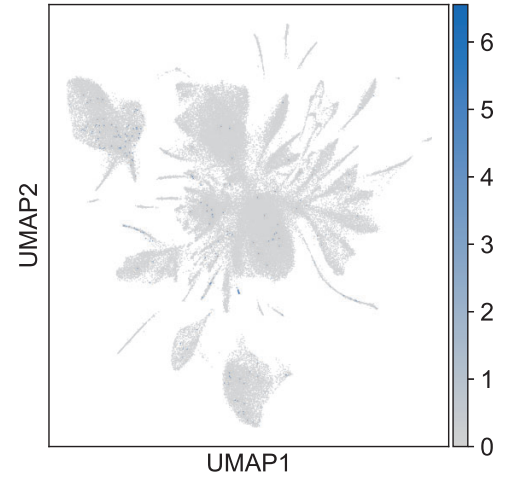

PrileiEVm011181t1

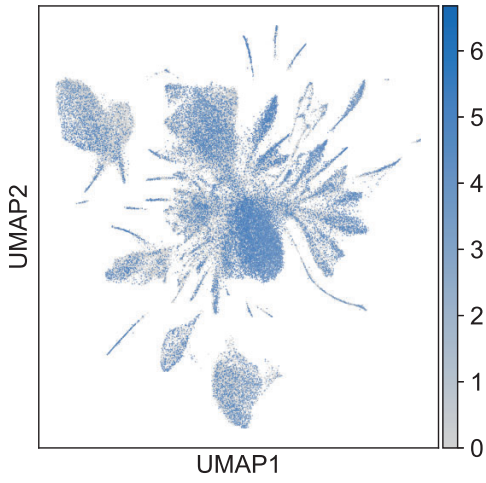

PrileiEVm016017t1

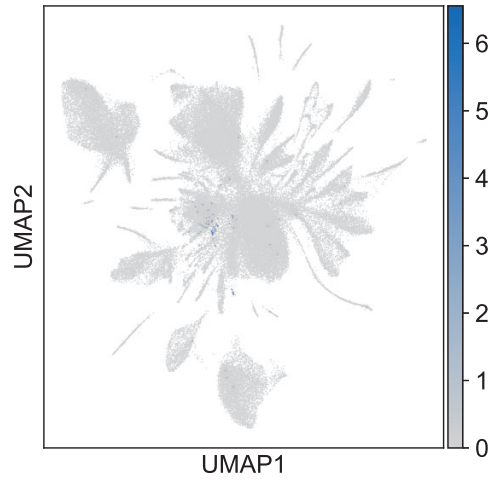

PrileiEVm015601t1

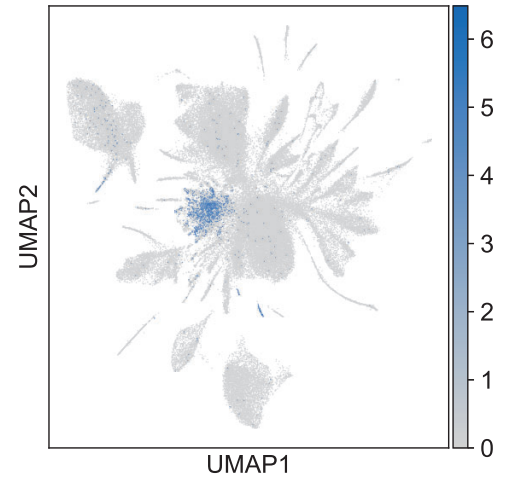

leiden\_1.5 cluster 55

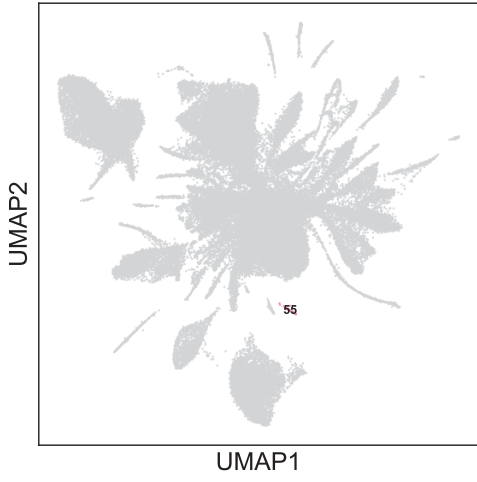

PrileiEVm018088t1

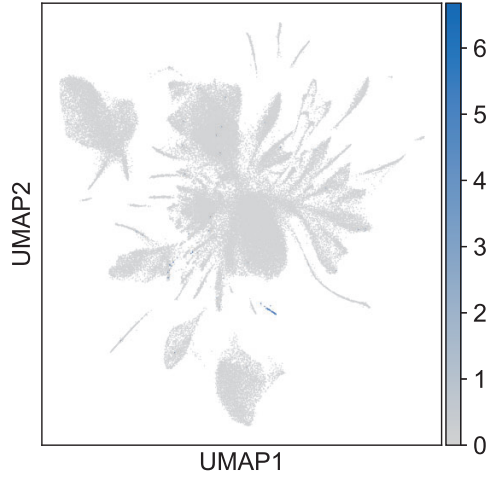

PrileiEVm016817t1

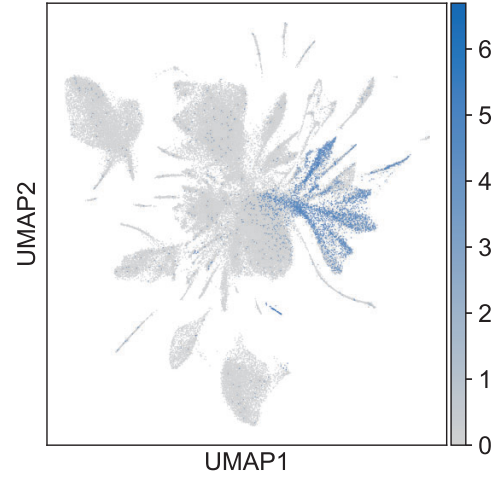

PrileiEVm013699t1

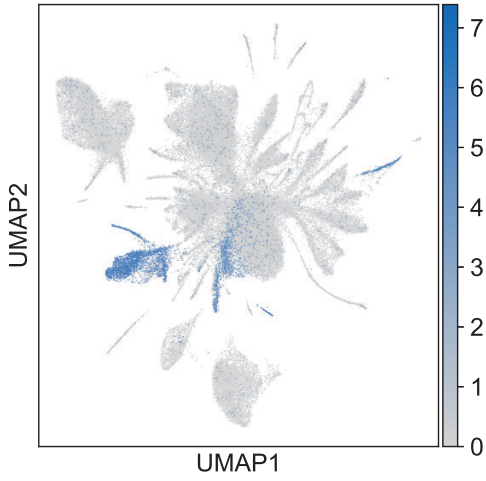

PrileiEVm007088t1

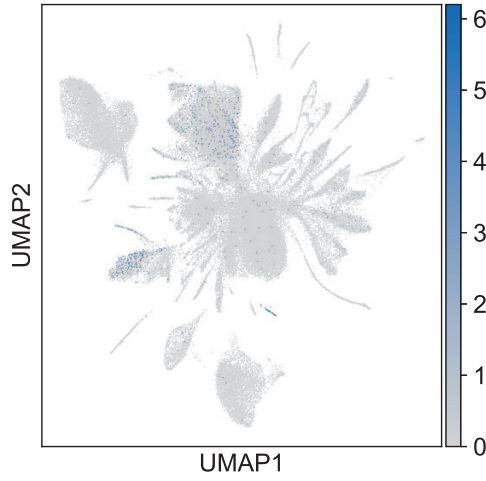

PrileiEVm020925t1

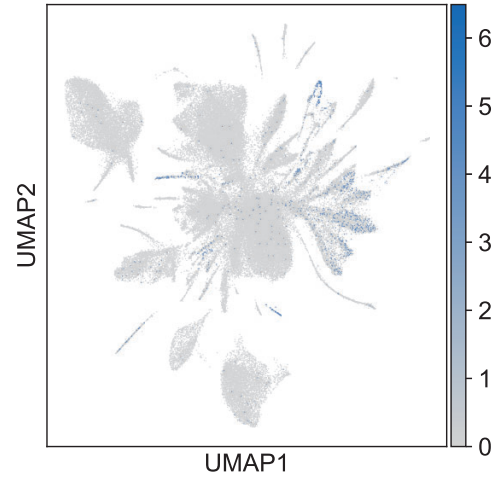

PrileiEVm013866t1

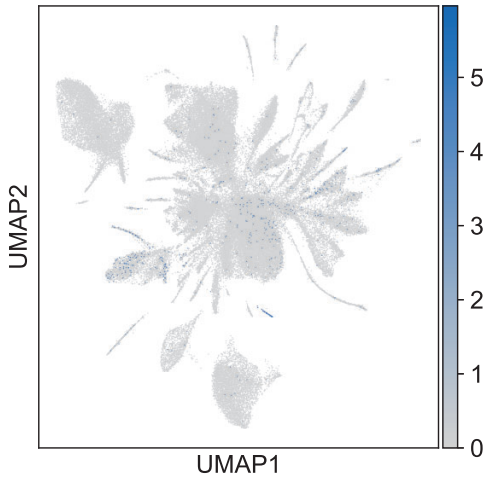

PrileiEVm013863t1

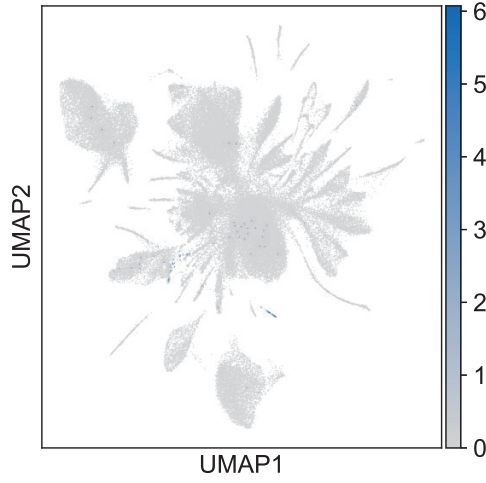

PrileiEVm016043t1

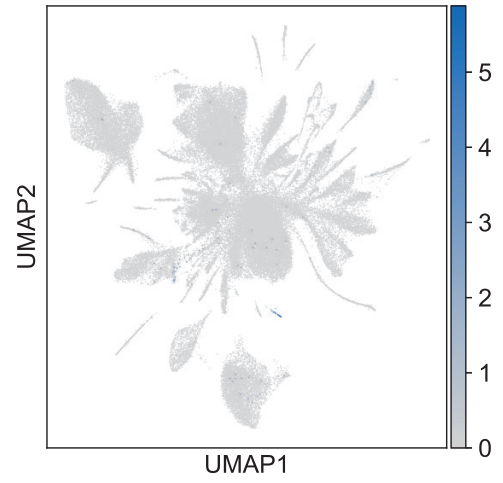

leiden\_1.5 cluster 56

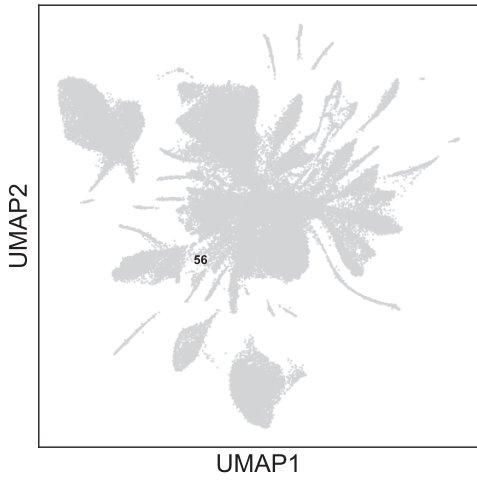

PrileiEVm020595t1

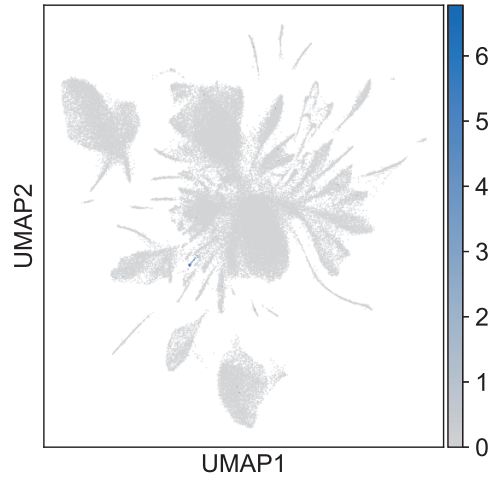

PrileiEVm020338t1

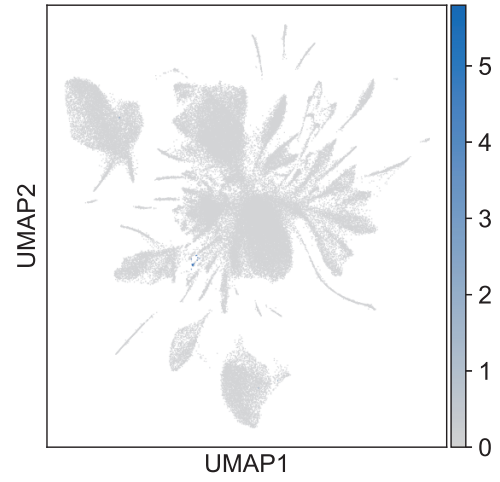

PrileiEVm020987t1

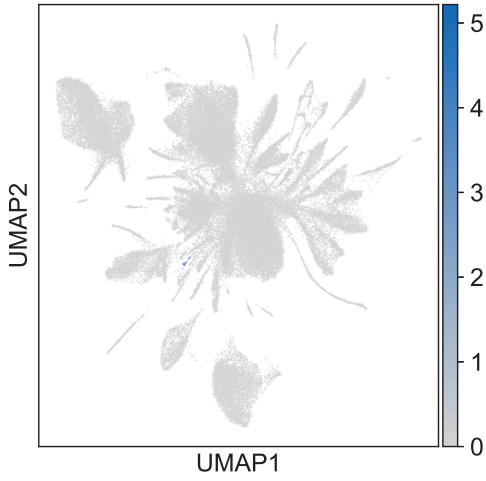

PrileiEVm027620t1

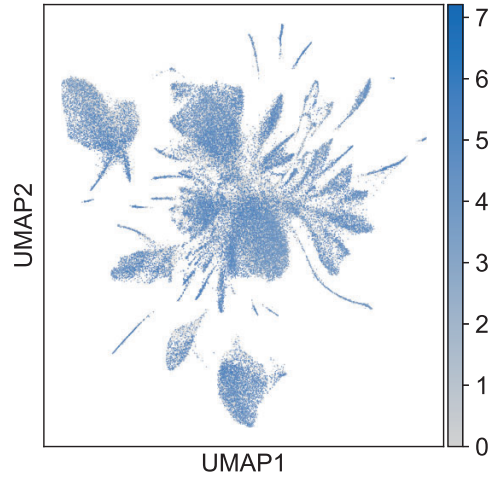

PrileiEVm018327t1

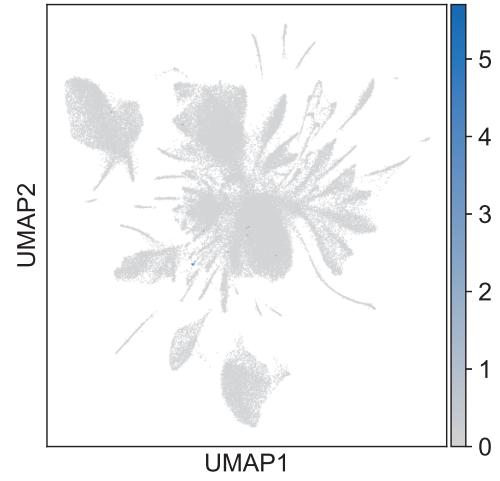



leiden\_1.5 cluster 57

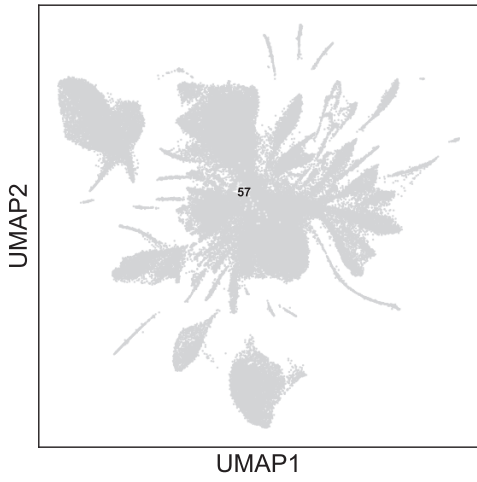

PrileiEVm012421t1

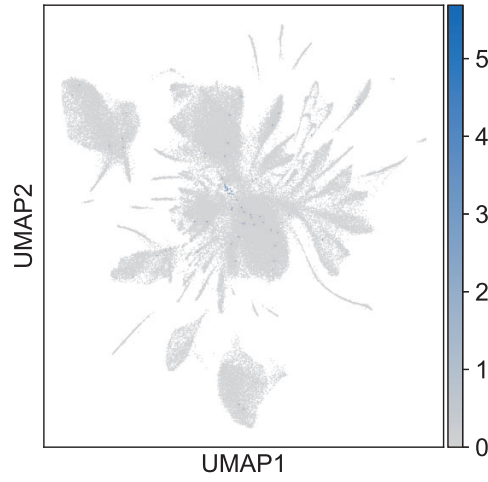

PrileiEVm012099t1

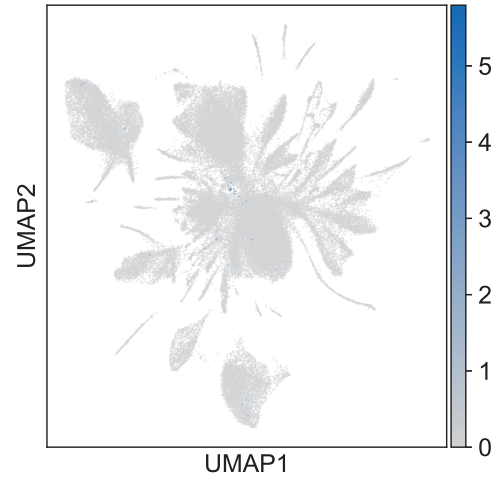

PrileiEVm012366t1

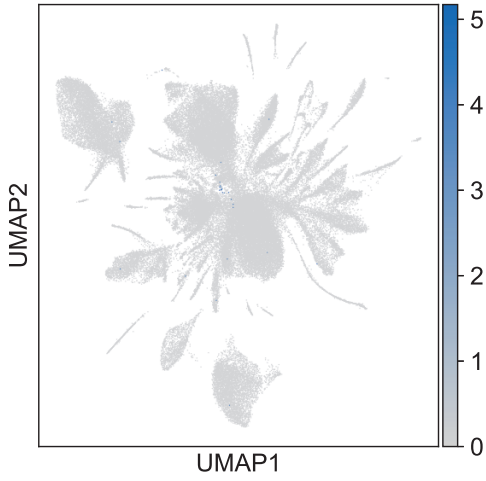

PrileiEVm012130t1

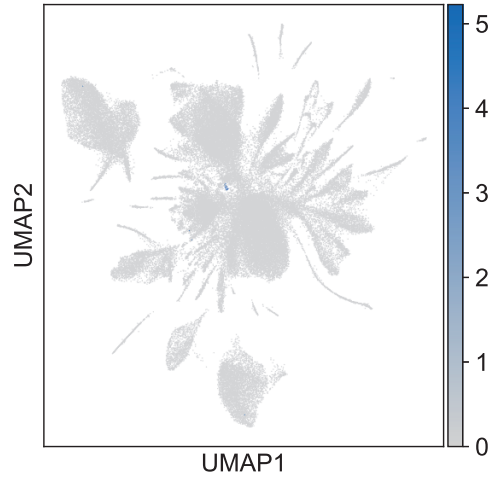

PrileiEVm011207t1

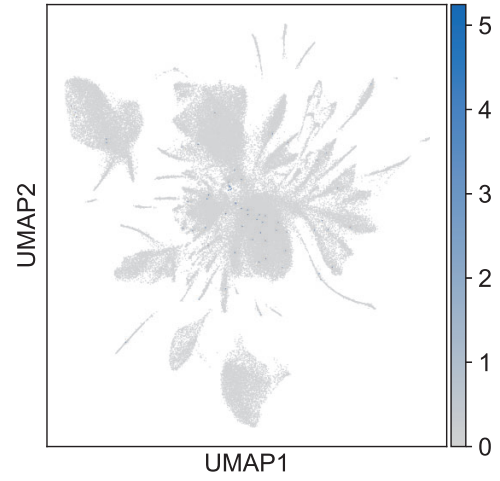

PrileiEVm012607t1

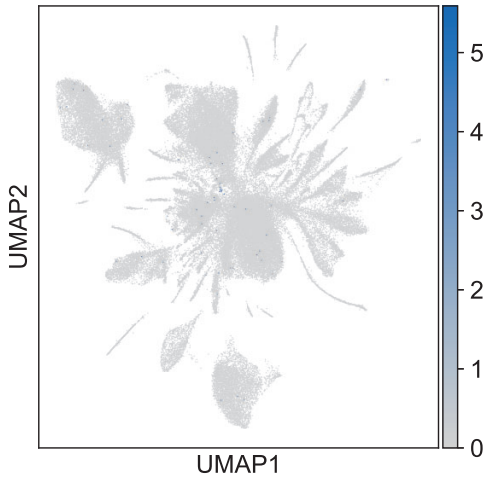

PrileiEVm012117t1

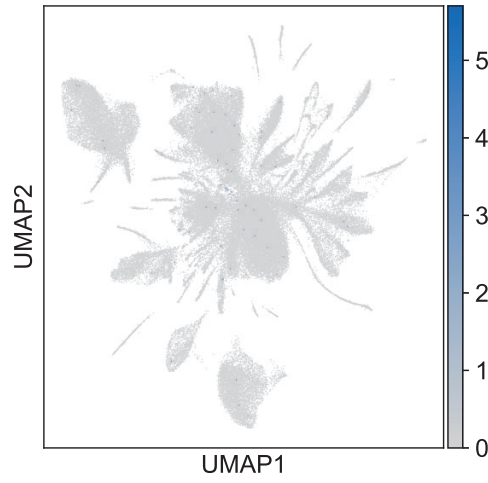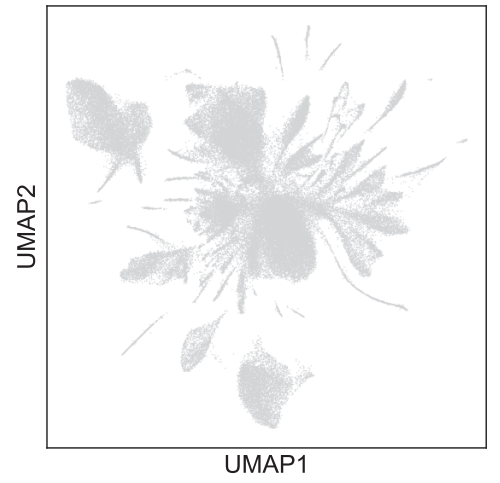

leiden\_1.5 cluster 58

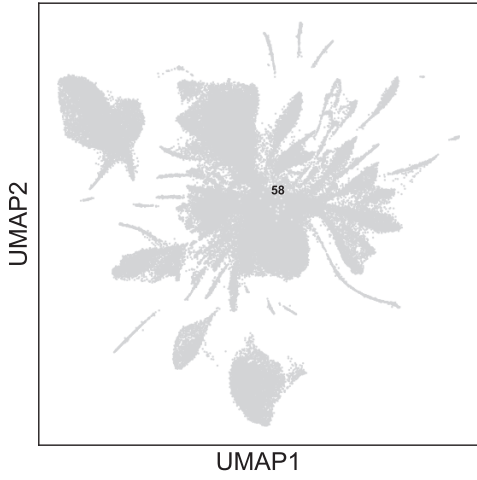

PrileiEVm018056t1

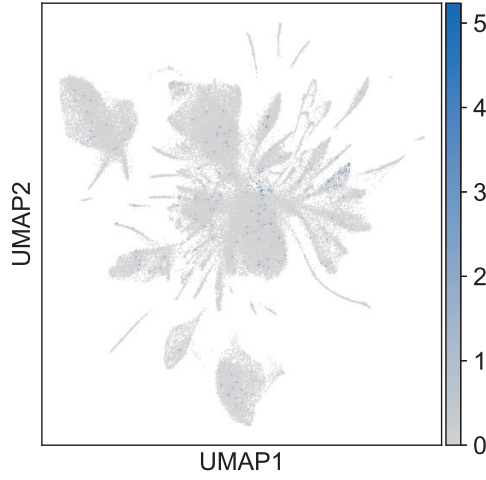

PrileiEVm021899t1

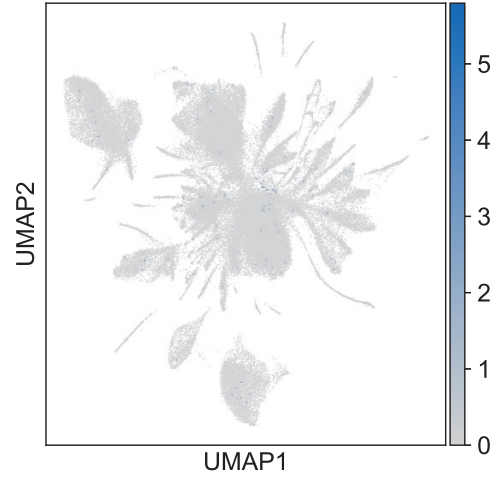

PrileiEVm010207t1

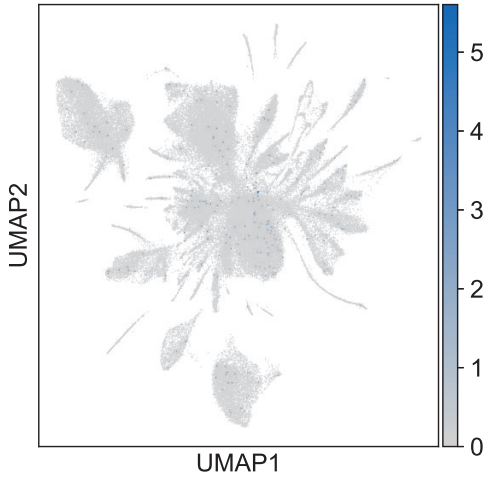

PrileiEVm017918t1

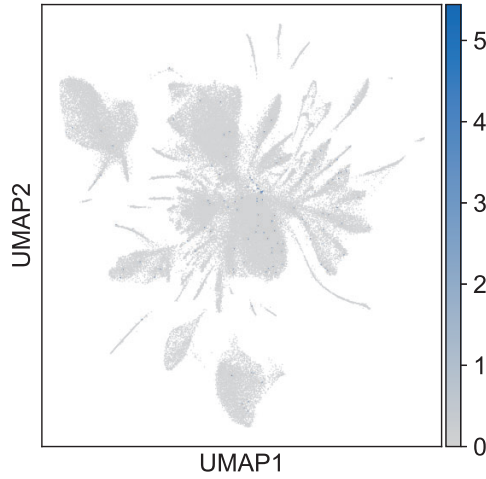

PrileiEVm005455t1

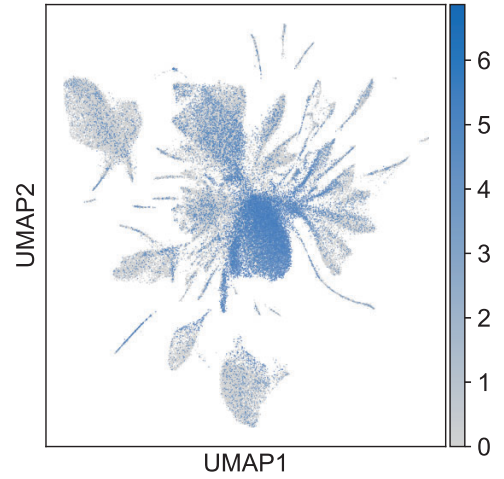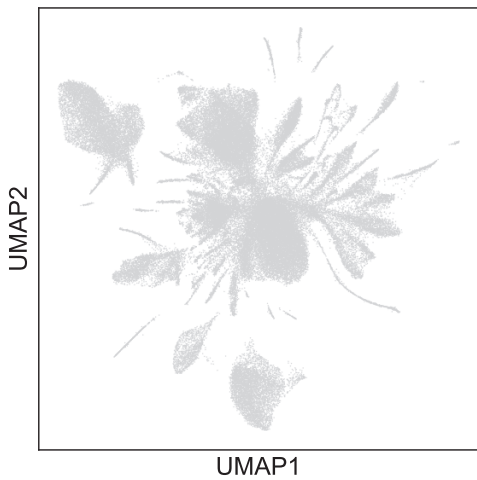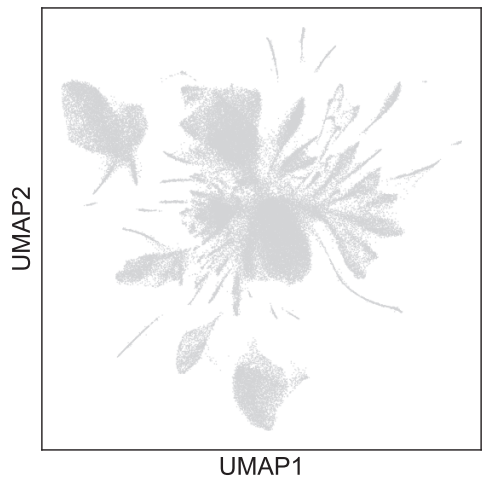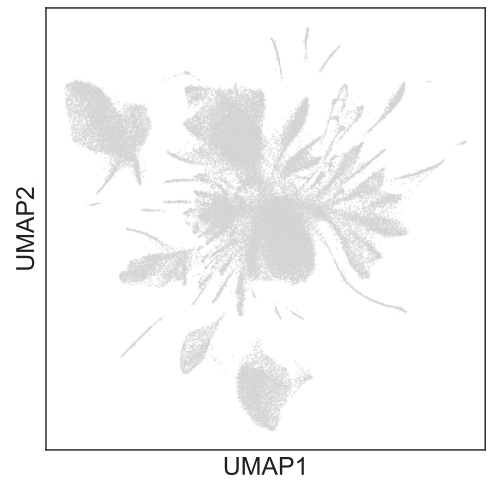

leiden\_1.5 cluster 59

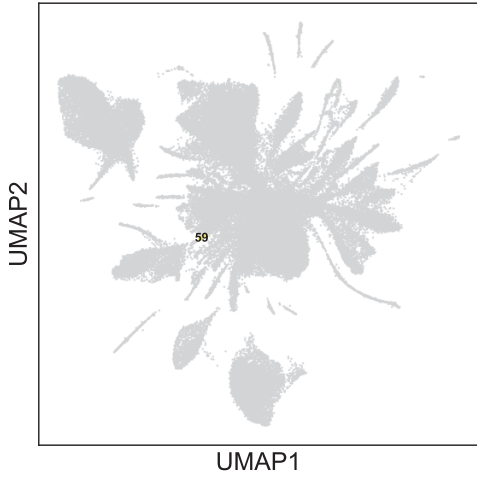

PrileiEVm018905t1

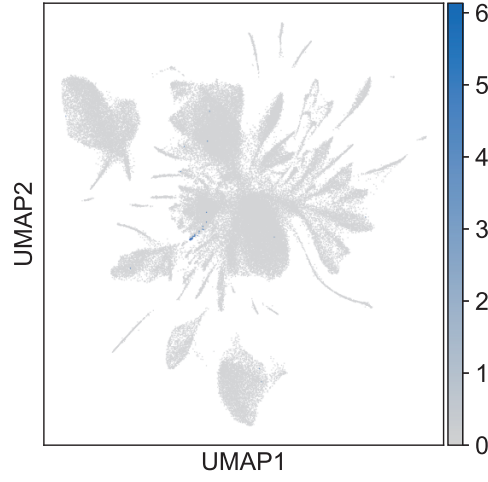

PrileiEVm018797t1

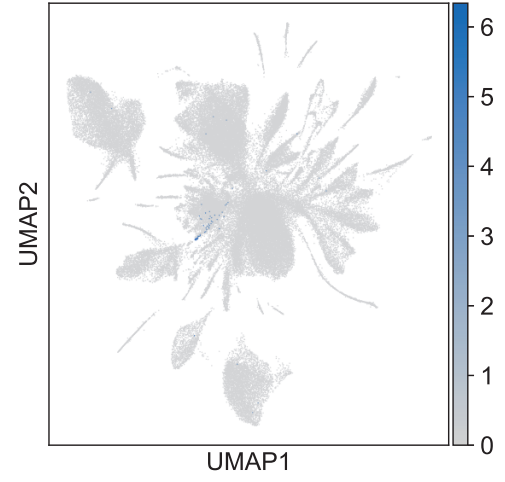

PrileiEVm014931t1

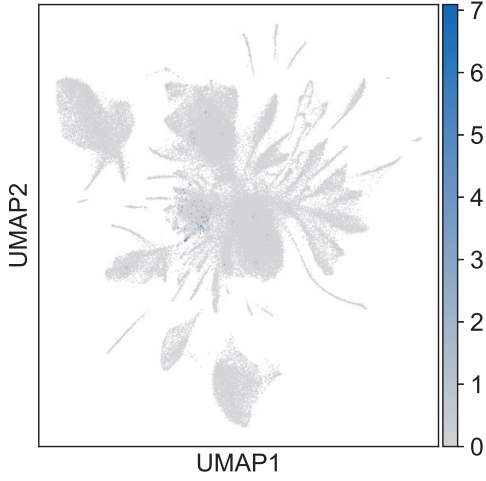

PrileiEVm023617t1

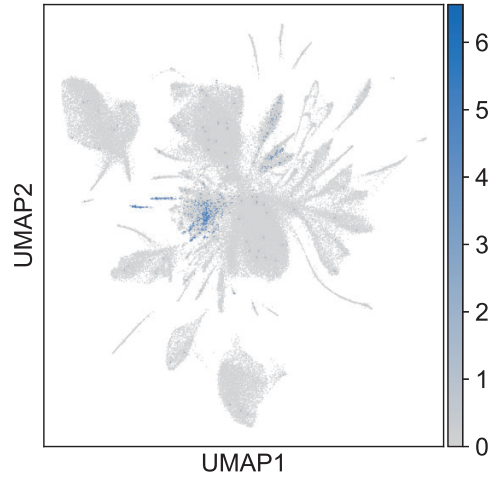

PrileiEVm019349t1

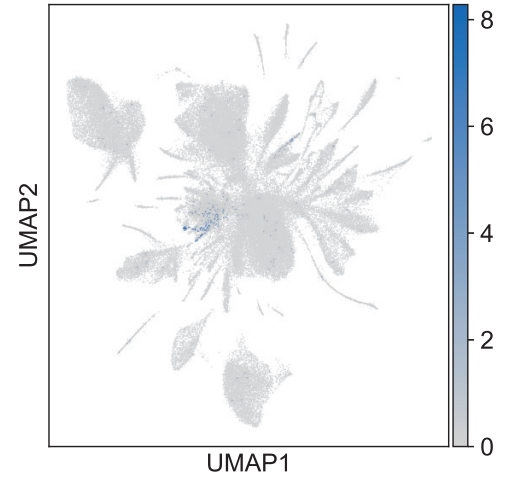

PrileiEVm017435t1

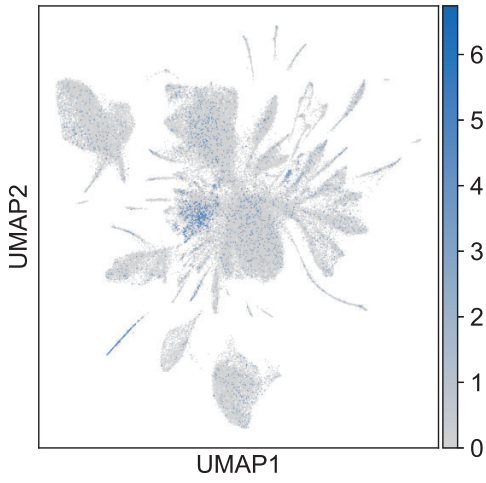

PrileiEVm009383t1

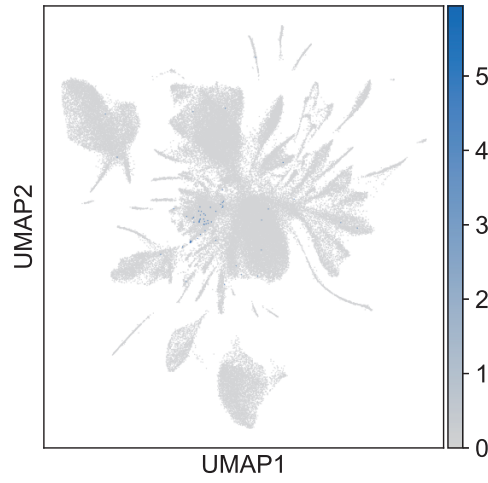

PrileiEVm012311t1

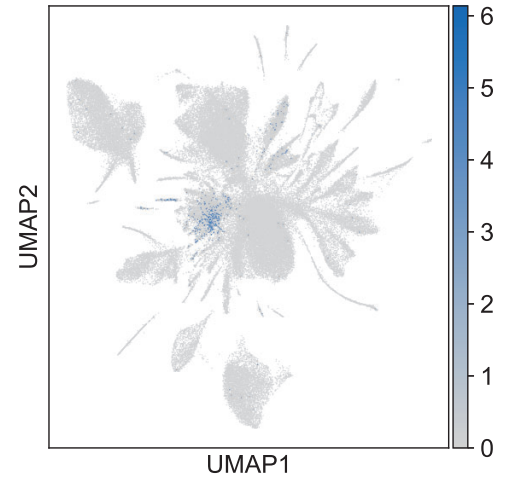

Supplement: 41467_2024_47401_MOESM8_ESM.pdf [file 41467_2024_47401_MOESM8_ESM.pdf]
