# Supplementary material for: Annelid adult cell type diversity and their pluripotent cellular origins
Source: PubMed Central journal article supplement (PMC11014941; doi:10.1038/s41467-024-47401-6), 2024-04-12

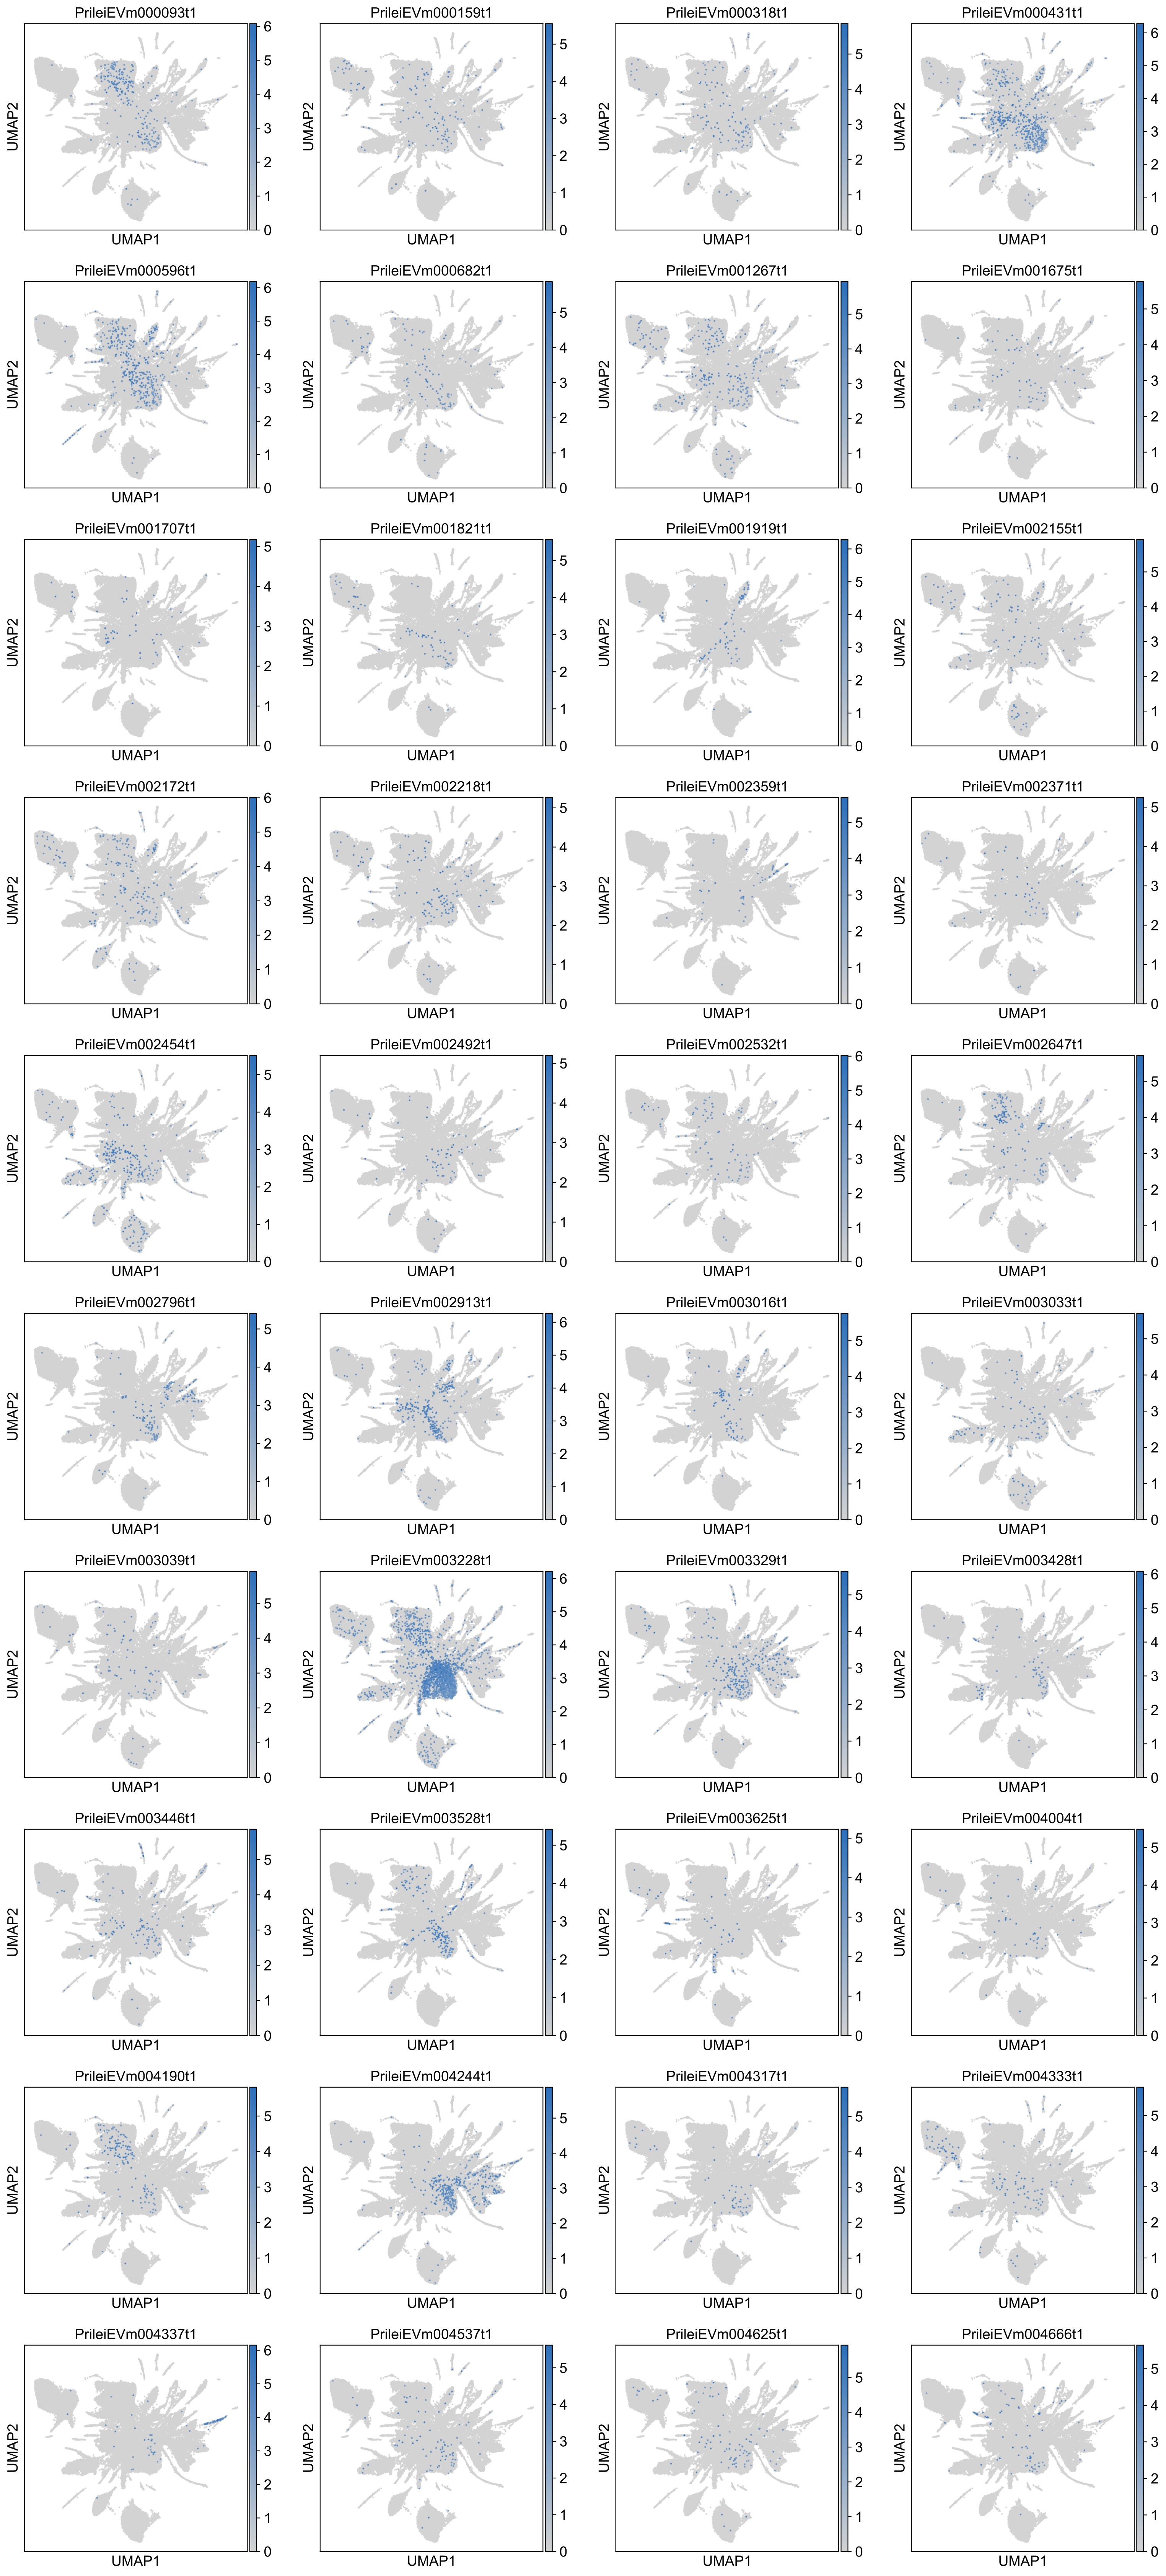



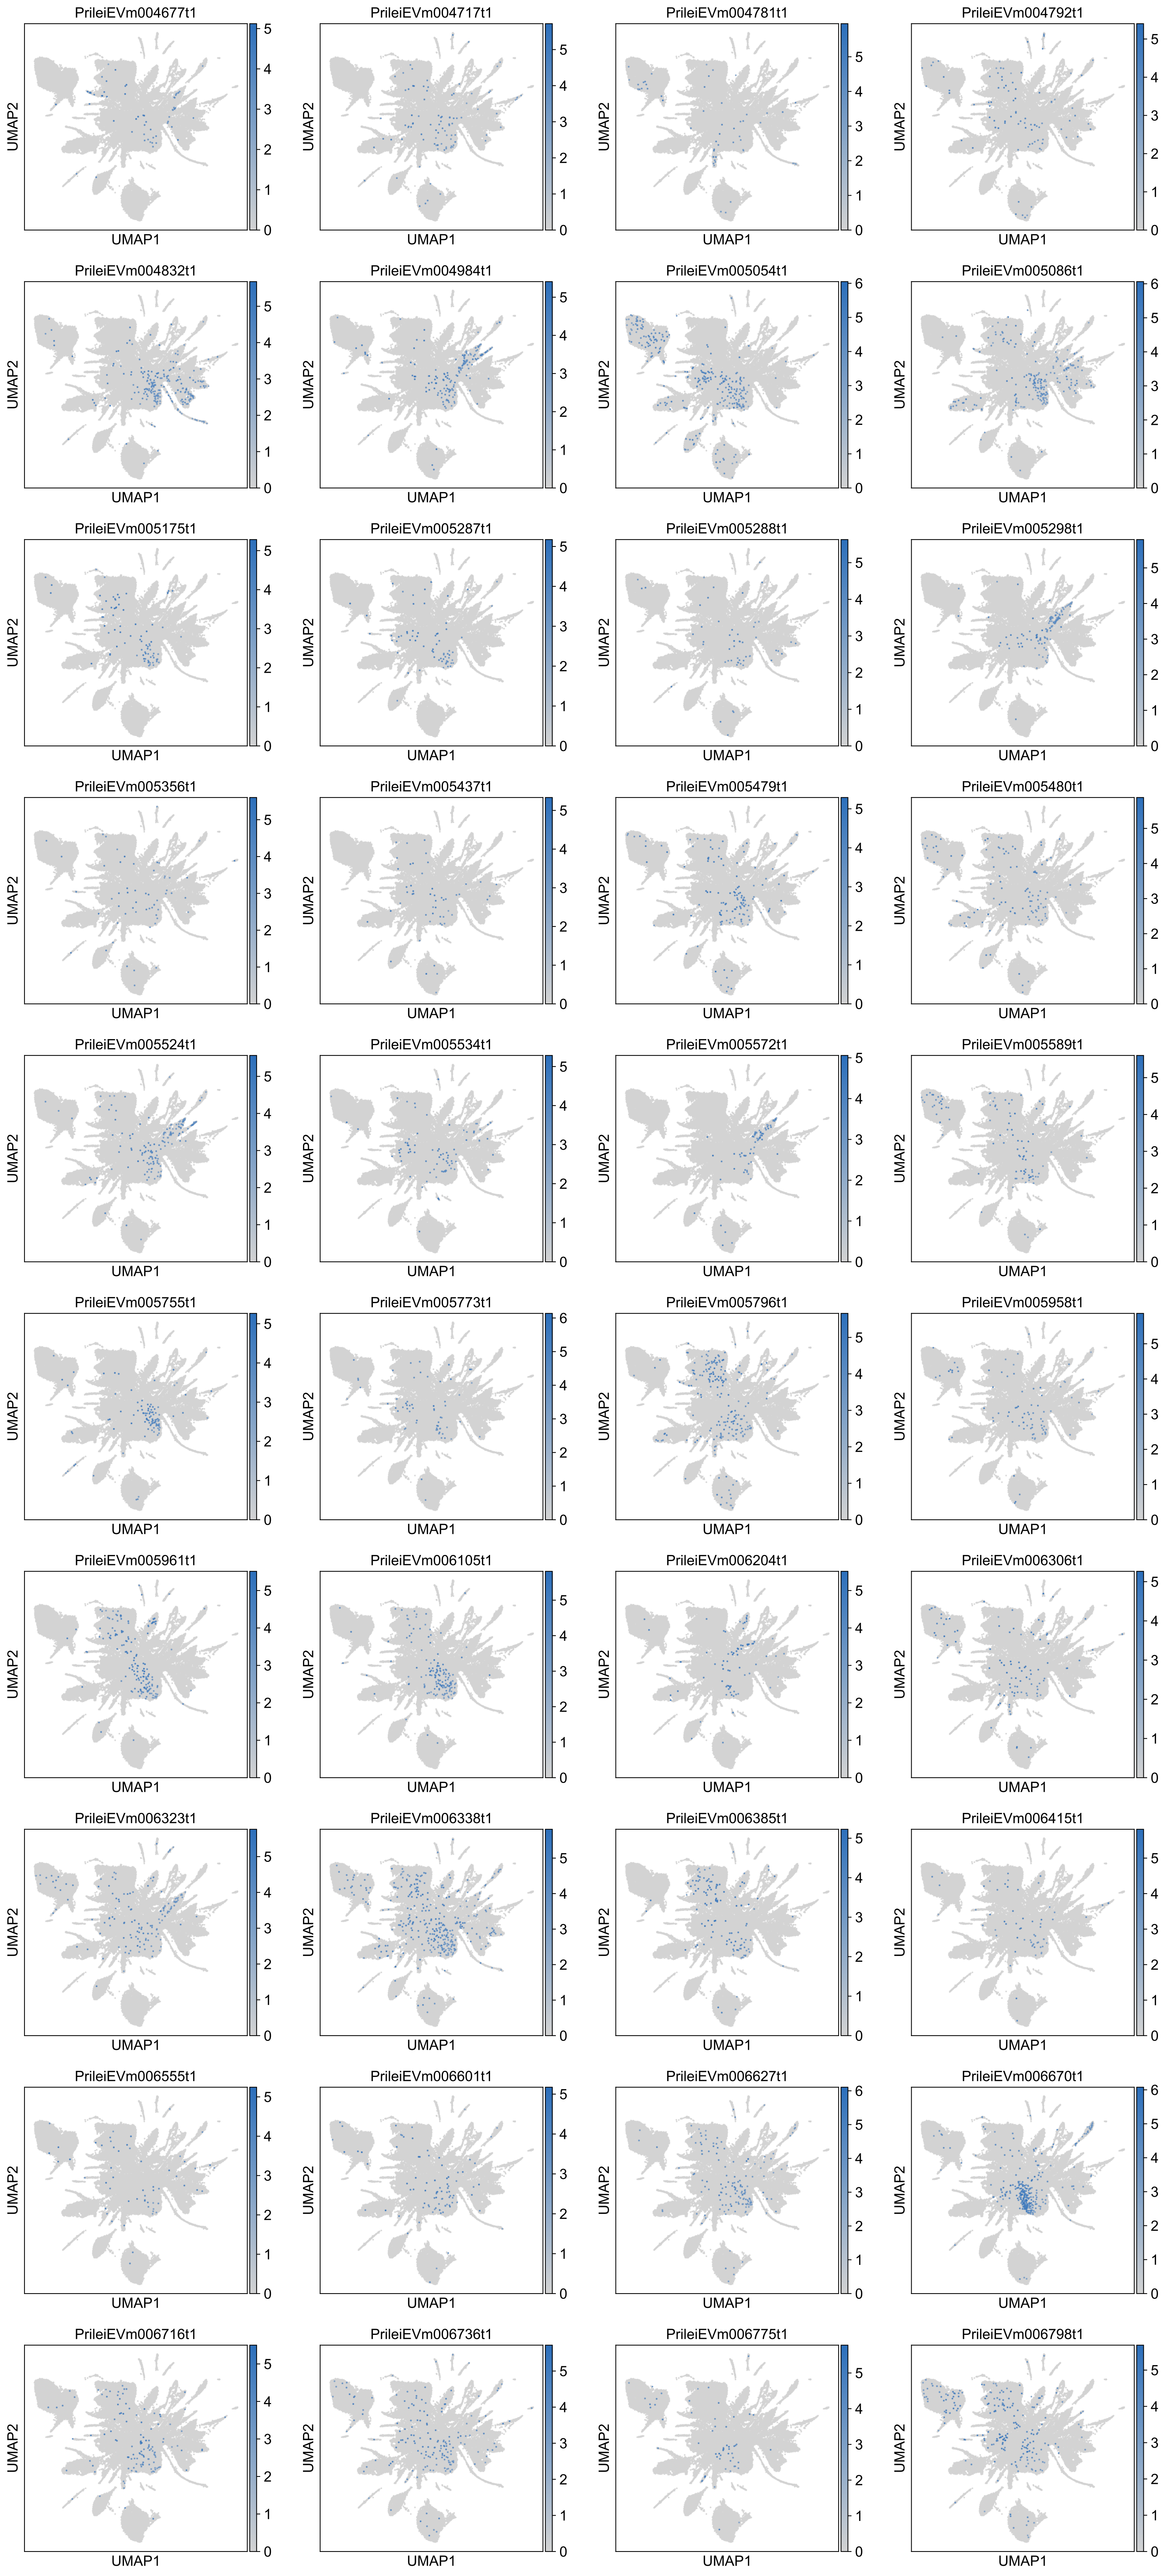



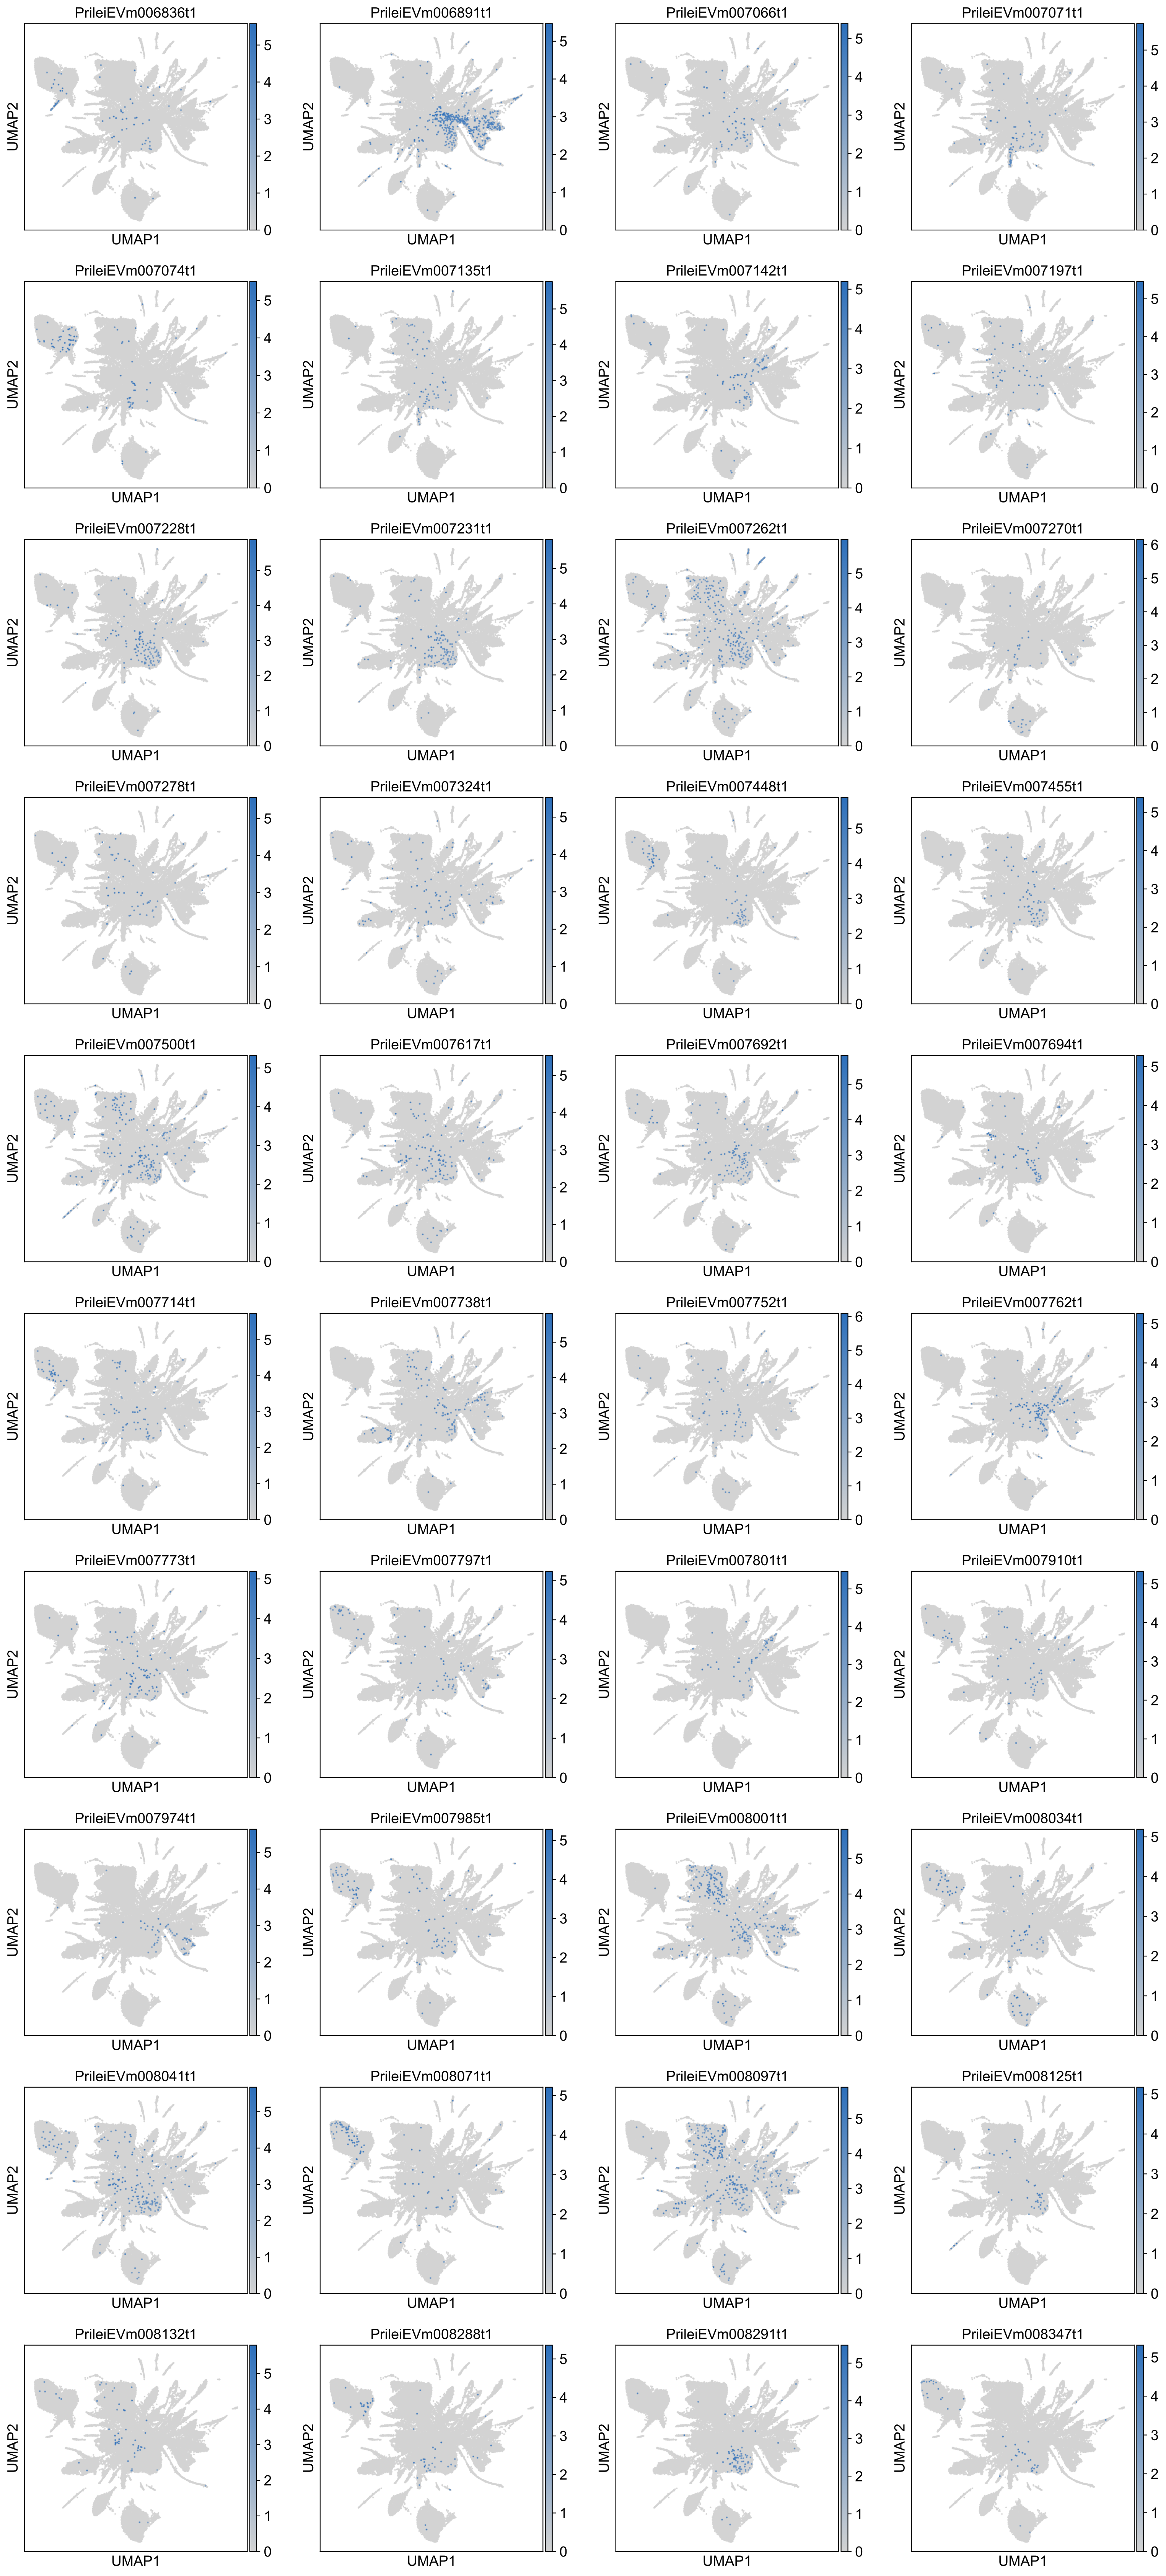



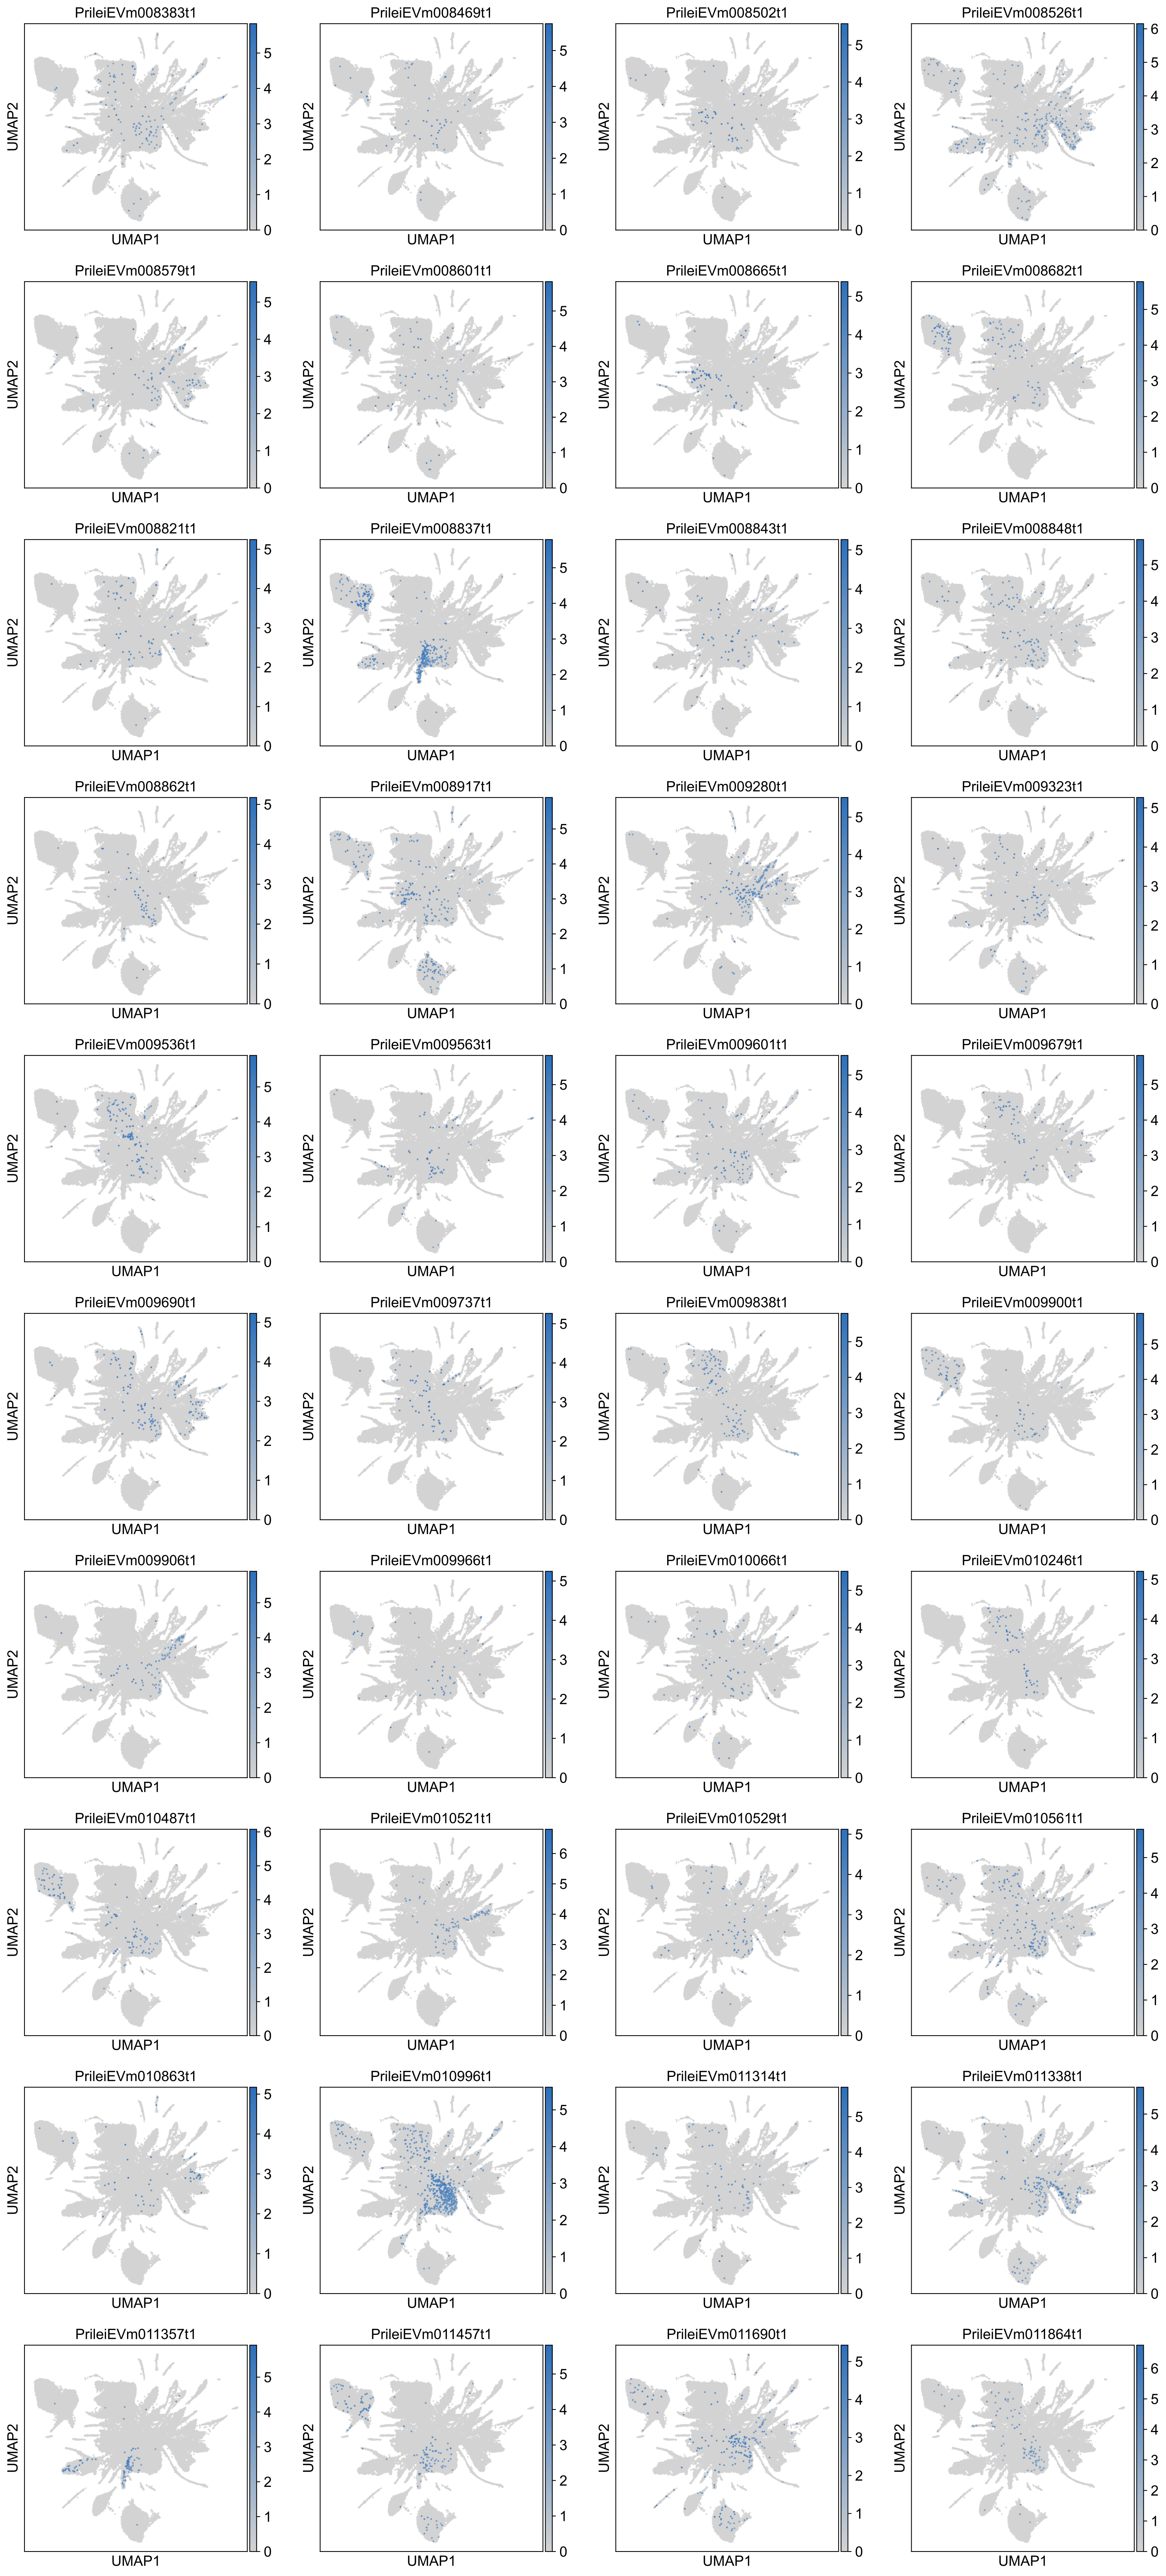



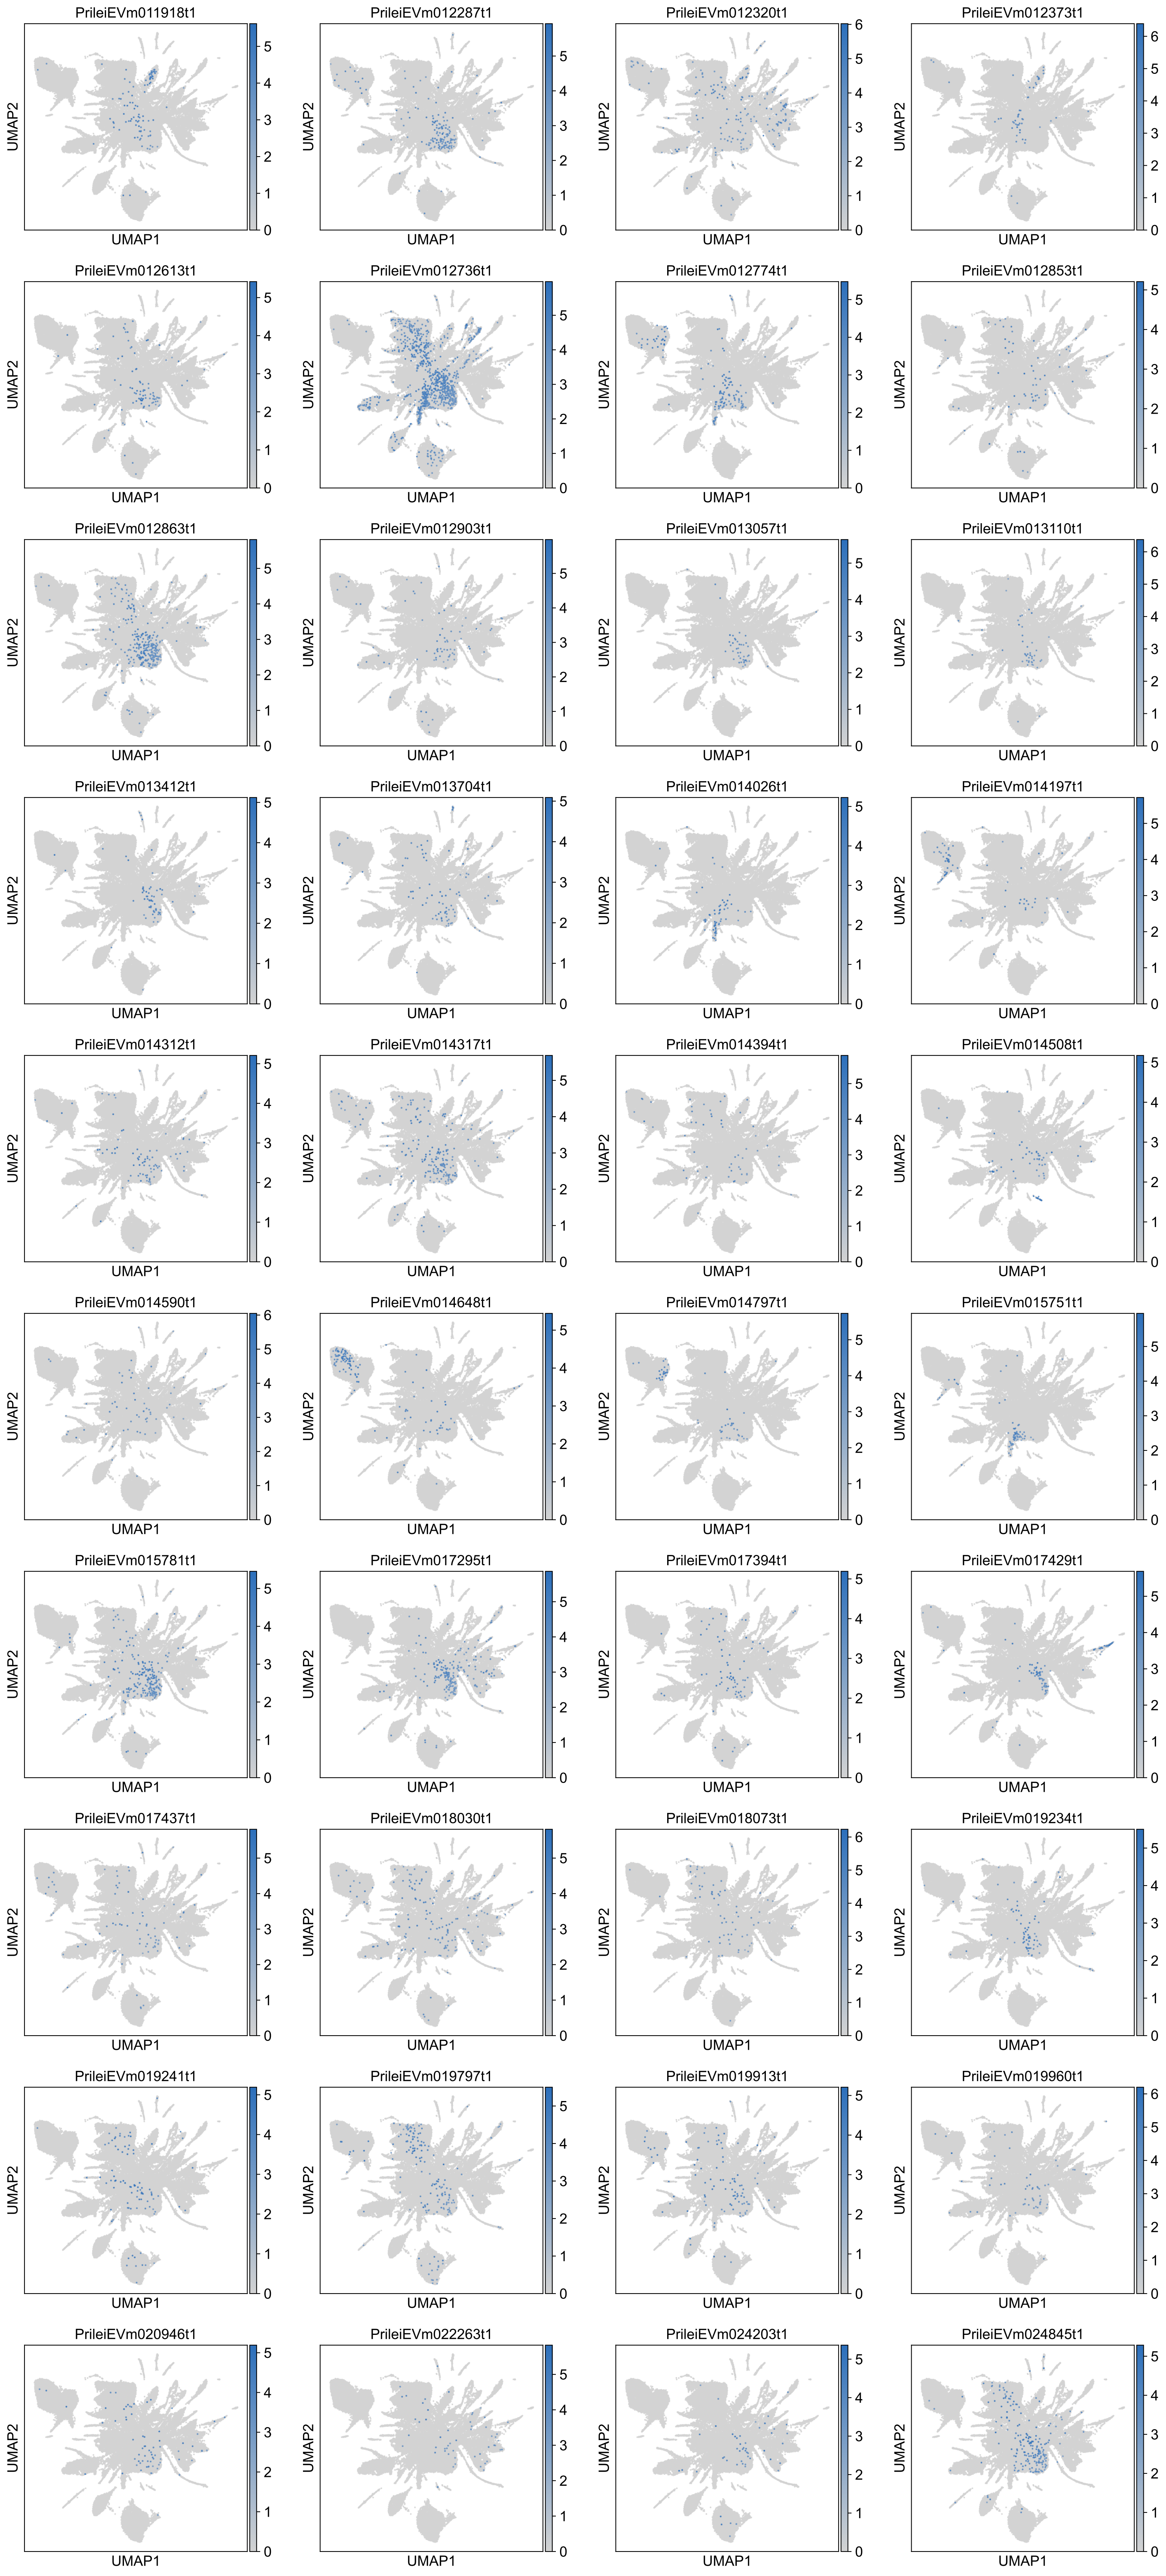

Supplement: 41467_2024_47401_MOESM15_ESM.pdf [file 41467_2024_47401_MOESM15_ESM.pdf]
